# Supplementary material for: Correlation Between Thioredoxin-Interacting Protein and Nerve Conduction Velocity in Patients With Type 2 Diabetes Mellitus
Source: Front Neurol. 2020 Jul 22;11:733. doi: 10.3389/fneur.2020.00733 (PMC7387714; doi:10.3389/fneur.2020.00733)
Supplement: Supplementary file 1 [file Table_1.XLSX]

## Sheet: 20200417����
分组	姓名	性别	年龄2	新空腹血糖	新糖化	神经病变有无	病程2	身高	体重	BMI	收缩压	舒张压	白蛋白	谷丙丙氨酸	谷草天冬氨酸	r谷氨酰	碱性磷酸酶	总胆固醇	甘油三酯	低密度	高密度	旧FBG	肌酐	尿素氮	尿酸	血钙	血磷	肾小球滤过率	空腹胰岛素	HOMAIR	糖化血红蛋白_1	糖化白蛋白	维生素D3	骨钙素	B胶原特殊序列	总I型胶原氨基酸延长肽	甲状旁腺素	视网膜病变有无	有无二甲双胍	有无用胰岛素	有无GLP1	冠心病0无1有冠心病无心梗2有过心梗的	总T3	总T4	TSH	尺神经运动	正中神经运动	腓总神经运动	尺神经感觉
1	代国清	1	54	9.91	8.1	无	0.015	160	72	28.12	154	117	45.7	17.3	17.9	100.4	118.8	6.45	1.17	4.47	1.31	9.91	80	7.3	399.4	2.39	1.12	95.85	5.34	2.35197	8.1	#NULL!	20.57	10.68	0.16	25.38	46.42	无	1	2	2	0	2.47	127	1.53	59.1	59	52.15	50.95
1	司晓鹏	1	33	11.3	9.6	无	0.02	170	88	30.45	102	75	#NULL!	#NULL!	#NULL!		#NULL!	5.88	2.09	#NULL!	#NULL!	11.3	#NULL!	#NULL!	#NULL!	#NULL!	#NULL!	#NULL!	#NULL!	#NULL!	9.6	25.13	12.53	15.53	0.55	70.45	49.49	无	1	1	1	0	1.8	85.38	1.39	52.5	57.5	47.5	62.5
1	王艳茏	2	46	6.44	6.9	无	0.03	166	50	18.14	106	74	35.5	16.7	17.4	31.1	62.7	3.99	0.52	1.31	2.47	6.44	62.7	4.2	214.6	2.17	1.55	102.61	#NULL!	#NULL!	6.9	#NULL!	#NULL!	#NULL!	#NULL!	#NULL!	#NULL!	无	2	1	2	0	1.02	104.2	1.5	65.3	63.05	48.4	79.45
1	杨华勤	2	52	7.81	7.8	无	0.04	173	86	28.73	133	97	43.2	74.9	55	30.1	110.9	4.56	1.94	0.98	3.08	7.81	56.1	6.1	223.2	2.51	1.22	103.22	24.63	8.54935	7.8	17.3	18.67	16.55	0.64	69.96	67.84	无	1	2	2	0	1.87	115.1	0.989	58.1	56.7	48.7	57.1
1	张玉苗	1	33	10.46	8.8	无	0.04	178	68	21.46	123	101	47.3	22.1	18	24.5	81.5	5.13	2.52	3.3	1.07	10.46	74	4.07	303.1	2.33	1.11	115.21	6.01	2.79398	8.8	#NULL!	24.03	12.79	0.19	35.06	30.95	无	1	1	2	0	1.51	94.55	2.76	62	58.5	46.5	66.9
1	刘伟	1	33	9.89	8.7	无	0.07	176	97	31.31	149	96	44.8	29.3	21.9	115.9	121.4	4.33	3.66	2.89	0.86	9.89	76.3	5.3	326.3	2.33	1.38	113.8	#NULL!	#NULL!	8.7	#NULL!	#NULL!	#NULL!	#NULL!	#NULL!	#NULL!	无	1	1	1	0	1.92	96.55	2.15	54.1	53.35	48.3	68.4
1	齐宝凤	2	55	17.72	13.6	无	0.1	160	60	23.44	135	91	#NULL!	#NULL!	#NULL!		133.7	6.31	5.28	#NULL!	#NULL!	17.72	#NULL!	#NULL!	#NULL!	#NULL!	#NULL!	#NULL!	#NULL!	#NULL!	13.6	#NULL!	#NULL!	#NULL!	#NULL!	#NULL!	#NULL!	无	1	1	2	0	1.01	84.92	2.01	65	58.4	50.15	58.35
1	武艳涛	1	37	8.1	10.2	无	0.1	169	64	22.4	121	72	38	27	39.8	24.9	77	3.53	1.38	2.17	0.88	8.1	68.9	3.5	349.9	2.28	1.53	115.36	2.52	0.9072	10.2	#NULL!	12.33	17.1	0.89	108.3	37.24	无	2	1	2	0	1.39	109.1	12.69	55.65	59.65	44.55	51.65
1	商段果	2	62	3.96	7.5	无	0.1	163	65	24.46	148	75	40.8	54.3	58.7	69	110.4	3.7	1.79	1.11	2.17	3.96	65	4.1	262.5	2.24	1.4	87.79	5.41	0.95216	7.5	#NULL!	35.5	20.01	0.7	55.59	45.98	无	1	2	2	0	2.41	161.1	6.07	63	58.5	47	60.1
1	彭海云	1	52	8.24	10.6	无	0.1	172	80	27	145	97	41	9.6	20.4	21.6	94.1	4.65	1.56	0.76	3.26	8.24	80.4	8.4	314.3	2.18	1.19	96.63	8.43	3.08725	10.6	27.45	18.07	11.94	0.37	41.27	40.45	无	1	2	2	0	1.7	94.55	0.837	58.5	57	44	61.75
1	张二菊	2	50	8.5	8.1	无	0.2	162	60	22.86	155	81	43.8	16.3	19.5	30.8	70.4	4.79	1.49	3.21	1.06	8.5	58.43	6.57	257.4	2.35	1.14	92.31	#NULL!	#NULL!	8.1	#NULL!	22.83	12.53	0.56	51.38	56.28	无	1	1	2	2	1.33	71.16	4.29	62	63	48.5	56
1	张云山	1	56	9.06389	5.6	无	0.2	168	62	21.97	94	73	#NULL!	#NULL!	#NULL!		#NULL!	#NULL!	#NULL!	#NULL!	#NULL!	9.06	#NULL!	#NULL!	#NULL!	#NULL!	#NULL!	#NULL!	#NULL!	#NULL!	5.6	#NULL!	#NULL!	#NULL!	#NULL!	#NULL!	#NULL!	无	1	2	2	0	#NULL!	#NULL!	#NULL!	55.8	54.55	48.75	56.1
1	赵森虎	1	46	6.1	13.7	有	0.2	170	64	22.15	123	70	39.92	18.3	15.5	13.5	99.2	4.61	0.61	3.07	1.01	6.1	62.5	3.9	254.82	2.3	1.32	112.72	4.47	1.21187	13.7	#NULL!	10.43	15.39	0.92	36.73	45.71	无	1	1	2	0	1.23	91.05	1.85	57	60	51	56.95
1	郝芳宾	2	40	20.12	12.9	2月	0.2	53	20.7	20.7	126	84	41.7	25.1	24.2	21.9	90.2	5.81	2.09	4.11	0.83	20.12	61.3	5	170	2.34	0.99	109.06	3.92	3.5054	12.9	0	13.89	9.04	0.23	26.07	33	有	2	1	2	0	1.31	87.82	1.6	54.65	54.45	43.9	53.25
1	臧少卫	2	49	9.06389	11.12	无	0.3	162	64	24.39	127	86	#NULL!	#NULL!	#NULL!		#NULL!	#NULL!	#NULL!	#NULL!	#NULL!	9.06	#NULL!	#NULL!	#NULL!	#NULL!	#NULL!	#NULL!	5.61	#NULL!	11.12	#NULL!	16.54	10.84	0.4	42.42	31.53	无	1	2	2	0	1.75	115.8	1.09	58.5	62	47.5	59.2
1	李明	1	62	4.84	9.1	有	0.4	183	87	25.98	143	82	38	21.5	19.5	14.2	85.8	2.09	1.1	1.28	0.53	4.84	69.1	3.8	249.7	2.09	1.68	96.66	#NULL!	#NULL!	9.1	#NULL!	18.59	22.13	#NULL!	#NULL!	43.57	无	1	1	2	0	1.79	113.1	0.201	67.25	62.3	#NULL!	65.9
1	牛景雁	2	38	4.95	6.8	无	0.5	165	67	24.61	108	83	40.6	10.2	12.9	8.7	38.9	4.2	0.8	2.69	0.97	4.95	55.6	5.6	280.1	2.25	1.35	114.22	6.66	1.4652	6.8	#NULL!	23.23	14.48	0.41	35.25	39.56	无	1	1	2	0	1.28	69.48	3.71	54.1	55.55	48.9	58
1	徐运华	2	64	5.69	8.84177	有	0.5	160	69	26.95	154	76	44.1	14.2	17.8	19	104.6	2.72	1.04	1.56	0.81	5.69	58	6	212.7	2.35	1.14	93.85	#NULL!	#NULL!	8.85	#NULL!	#NULL!	#NULL!	#NULL!	#NULL!	#NULL!	有	1	2	2	0	1.47	97.16	6.03	56.75	52.45	45	52
1	边江	1	44	8.2	5.2	无	0.6	172	75	25.35	107	71	39.5	45	21.4	34.7	70.1	5.4	2.1	3.56	1.16	8.2	77.41	5.59	292.01	2.28	1.38	104.69	9.77	3.56062	5.2	#NULL!	14.82	13.25	0.47	41.08	33.18	无	2	2	2	0	1.57	56.97	2.47	57.25	56.75	45.25	57.9
1	裴慈恩	2	37	6.72	7.5	无	0.6	158	59	23.63	114	85	48.9	15.8	18	23.4	71.6	5.79	1.85	3.94	1.07	6.72	70.3	4.2	343.4	2.43	1.12	95.23	6.46	1.92939	7.5	#NULL!	#NULL!	#NULL!	#NULL!	#NULL!	#NULL!	无	2	2	2	0	1.34	117.5	1.53	58.25	62.3	48.7	57.6
1	齐恒建	1	56	9.06389	6.4	无	0.6	168	87	32.74	136	101	46.1	12.6	14.1	21.4	94.7	5.35	2.65	3.9	0.78	9.06	89.4	7.4	408	#NULL!	#NULL!	62.31	11.2	#NULL!	6.4	#NULL!	11.53	8.19	0.45	42.97	62.75	无	2	2	2	0	1.55	112.3	1.64	63.5	58	48	62.2
1	王凤霞	2	55	9.06389	14.2	有	0.6	163	70.5	26.53	154	101	#NULL!	#NULL!	#NULL!		#NULL!	#NULL!	#NULL!	#NULL!	#NULL!	9.06	#NULL!	#NULL!	#NULL!	#NULL!	#NULL!	#NULL!	1.92	#NULL!	14.2	#NULL!	14.22	13.59	0.51	53.83	39.35	无	1	1	2	0	1.46	81.51	2.38	55.45	53.3	46.6	60.65
1	魏建华	1	65	9.92	11	有	0.6	170	70	24.22	111	87	36.9	17.5	18.4	21	86.9	4.95	1.7	0.83	3.68	9.92	86.5	8.8	417.7	2.21	1	80.7	2.34	1.03168	11	41.68	13.77	5.27	0.4	19.96	32.06	无	1	1	2	0	0.85	87.06	0.335	54.6	55.05	43.9	61.8
1	赵风岐	1	62	7.82	5.2	有	0.6	170	62	21.45	120	59	37.7	23	18.5	13.2	64.6	7.78	0.9	1.41	5.45	7.82	64.1	4.5	165.6	2.12	0.91	99.69	2	0.695111	5.2	51.31	#NULL!	#NULL!	#NULL!	#NULL!	#NULL!	无	1	1	2	0	1.1	66.54	9.24	52.95	47.05	43.2	52.5
1	朱卫东	1	51	5.11	5.6	有	0.6	170	90	31.34	128	75	41.1	20.3	19.7	29.5	68.4	5.28	1.76	1.17	3.54	5.11	66.4	5.4	504.5	2.31	1.44	106.15	11.84	2.689	5.6	13.86	28.9	20.14	0.38	52.58	45.13	无	1	2	2	1	1.52	80.17	2.57	54.65	55.9	48.05	65.5
1	李春英	2	66	12.01	11.9	有	0.6	150	74	32.89	139	111	30.06	8.7	11.3	17.2	109.7	7.03	1.33	4.21	1.7	12.01	49	4.05	208.9	2.34	1.21	97.81	4.97	2.65288	11.9	29.08	11.9	14.72	0.36	42.11	64.51	无	2	1	2	0	1.29	96.66	2.75	53.6	55.1	43.5	58.3
1	杜永春	1	73	7.17	6.7	有	0.9	175	66	21.55	121	71	35.6	17.3	17.7	47.2	89.6	3.62	0.82	2.56	0.74	7.17	89	6.7	308.1	2.16	1.16	73.73	4.55	1.44993	6.7	#NULL!	18.85	13.74	0.42	38.76	29.23	有	2	2	2	0	1.31	90.36	2.56	52.95	51.95	43.6	47.4
1	倪立新	1	51	7.36	7.9	无	1	172	77	26.03	124	77	43.4	18.8	15.1	40.8	73.5	4.88	5.14	2.85	0.81	7.36	82.1	6	339.4	2.31	1.2	94.88	#NULL!	#NULL!	7.9	#NULL!	9.31	12.39	0.28	28.02	38.61	无	1	2	2	0	1.47	75.14	1.33	59.85	59.1	44.25	64.05
1	倪卫江	1	43	6.57	8.1	无	1	170	94	32.53	146	90	43.9	9.5	12	25.6	81.6	6.32	2.3	4.44	0.8	6.57	83.1	6.4	459.6	2.29	1.5	98.91	6.17	1.80164	8.1	#NULL!	#NULL!	#NULL!	#NULL!	#NULL!	#NULL!	无	1	2	2	0	1.39	75.66	2.55	54.2	53.5	47	65.1
1	王彦民	1	56	6.14	5.8	无	1	170	55	19.03	115	71	44.8	23.3	23.8	46.8	110.2	4.09	0.69	2.15	1.58	6.14	82.6	5.01	277.7	2.4	1.13	90.99	2.98	0.813209	5.8	18.98	28.01	9.7	0.14	50.05	19.54	无	2	2	2	0	1.73	109.7	2.59	59.55	59.05	46.25	61.25
1	罗士秀	2	71	4.68	6.7	无	1	155	70	29.14	137	82	36.5	21.1	22.1	22.6	73.9	7.22	2	4.72	1.44	4.68	64	4.1	256.8	2.23	1.13	84.05	#NULL!	#NULL!	6.7	#NULL!	8.64	25.53	0.6	69.04	62.45	无	2	1	2	0	1.72	89.49	1.01	52.15	54.9	45	64.55
1	甄献花	2	50	11.87	13	有	1	160	64	25	114	86	38.9	35.6	24.7	71	93	6.76	2.51	4.57	1.2	11.87	49.34	4.07	277.97	2.47	1.73	109.19	#NULL!	#NULL!	13	#NULL!	14.15	9.7	0.35	40.72	19.13	无	1	1	2	0	1.29	106.8	1.31	53.35	54.7	45	61.1
1	郝建民	1	62	10.76	11.4	有	1	173	82	27.4	151	78	38.9	17	20.9	11.6	96.9	3.67	0.5	2.16	1.13	10.76	70.2	6.5	275.9	2.24	1.04	96.04	#NULL!	#NULL!	11.4	#NULL!	#NULL!	#NULL!	#NULL!	#NULL!	#NULL!	无	1	1	2	0	1.44	78.82	1.11	52.85	52.4	43.5	52.6
1	张普	1	48	9.88	8.3	有	1	178	80	25.25	175	101	40	274.6	146.3	242.7	176.2	4.88	0.88	3	1.32	9.88	55.8	4.5	207.4	2.29	0.96	116.45	7.96	3.49532	8.3	24.46	15.83	15.25	0.69	84.81	42.59	无	2	2	2	0	1.95	76.58	2.07	53.9	53.8	44.1	54.5
1	白振宇	1	38	13.37	10	有	1	180	92	28.4	130	95	37.1	32.4	13.5	89.4	78.6	4.55	5.72	2.97	0.75	13.37	88.8	6	580.4	1.94	0.84	94.55	5.8	3.44649	10	#NULL!	6.41	5.28	0.6	25.62	31.45	有	1	1	2	0	0.57	66.62	1.41	53.35	53.5	43.75	48.6
1	耿敖孩	1	55	7.11	11.8	有	1	175	70	22.86	149	93	43.4	33.4	25	50.8	138.9	5.36	1.12	3.43	1.03	7.11	71.4	4.8	245.8	2.35	1.07	100.18	#NULL!	#NULL!	11.8	#NULL!	15.54	15.33	0.7	71.78	33.96	无	2	1	2	0	1.92	127.5	2.11	65.5	62.5	45.5	53.55
1	常宏	1	39	5.25	5.8	有	1	175	70	22.86	107	72	40.2	12.5	13	12.3	49	4.26	1.45	0.91	3.17	5.25	69.8	6	265.8	2.22	1.45	113.17	4.31	1.00567	5.8	14.37	#NULL!	#NULL!	#NULL!	#NULL!	#NULL!	无	1	2	2	0	1.5	81.73	4.75	54.9	55.75	43.4	52.45
1	王玉琨	1	50	12.36	13.2	有	1	174	85	28.08	113	82	42.1	57.8	42.3	39.1	86.8	5.65	2.97	3.9	0.99	12.36	108.4	8.5	373.5	2.3	1.38	68.29	#NULL!	#NULL!	13.2	#NULL!	21.7	12.05	0.47	55.59	33.55	无	2	1	1	0	0.757	47.83	7.44	54.65	51.95	43.15	55.6
1	赫志花	2	68	9.55	9.1	无	2	155	72	29.97	123	88	40.02	30.9	23	24.8	87.2	6.57	1.71	4.27	1.58	9.55	82.1	3.84	188.15	2.26	1.16	63.46	6.86	2.91169	9.1	#NULL!	25.91	18.23	0.62	44.25	24.14	无	1	2	2	1	0.898	83.55	2.78	52.65	54.25	48.3	59.35
1	王洋	1	27	8.17	10.9	无	2	183	90	26.87	139	93	40.6	12.8	12.3	29.5	40.9	3.15	0.76	2.09	0.81	8.17	63.43	5.1	274.83	2.35	1.38	128.03	9.2	3.34062	10.9	#NULL!	13.45	13.15	0.46	25.82	37.54	无	1	2	2	0	1.19	84.81	1.35	61	60.5	49.5	59
1	张守龙	1	42	8.55	8	无	2	175	95	31.02	136	90	44.7	36.4	29	29.3	99.3	5.34	3.26	3.33	0.99	8.55	66.2	7.6	452.7	2.28	1.41	113.22	22.84	8.6792	8	#NULL!	22.97	16.26	0.5	74.7	45.5	无	1	2	2	0	1.48	74.5	2.63	53.55	55.5	44.35	60.45
1	张兆	1	44	5.09	6.2	无	2	173	70	23.39	137	97	42.3	18.3	20.7	82.1	75.7	5.03	3.47	2.86	1.09	5.09	88.9	4.8	510.4	2.31	1.18	90.52	#NULL!	#NULL!	6.2	#NULL!	14.68	17.19	0.68	49.16	60.26	无	1	2	2	0	1.5	82.78	1.59	63.35	61.4	50.7	65.85
1	邵晨	1	40	12.86	9.4	无	2	170	69	23.88	129	69	42.6	19	17	24	45.4	4.09	2.43	0.97	2.77	12.86	62.8	5.3	283	2.47	1.16	117.34	8.61	4.92109	9.4	24.02	17.96	11.68	0.24	19.38	34.4	非增殖期	1	2	1	0	1.54	118.9	0.963	52.45	53.1	43.95	59.35
1	王建霞	2	50	5.35	5.7	无	2	162	55	20.96	103	61	40.8	12.9	16	13.5	84.2	5.87	4.3	1.02	3.67	5.35	54.9	5.4	523.42	2.43	1.12	105.42	9.15	2.17567	5.7	15.07	19.37	36.19	0.73	85.03	47.57	无	2	2	2	0	1.12	66.67	3.27	58.65	57.15	49.55	62.45
1	刘克敏	1	42	8.66	7.7	无	2	186	90	26.01	131	87	45.9	31.5	24.6	71.1	55.2	5.77	3.11	1.17	3.77	8.66	86.5	7.2	504.4	2.39	0.89	94.89	18.15	6.98573	7.7	22.31	21.19	9.87	0.18	17.55	49.13	无	1	2	2	0	1.47	93.45	2.26	60.9	60.65	48.9	56.5
1	刘志宏	1	49	6.49	6.5	无	2	178	87	27.46	177	98	43.9	25.5	21.8	112	94.4	5.07	2.29	1.17	3.4	6.49	65.7	6.4	361.9	2.34	0.88	108.12	14.84	4.28052	6.5	16.28	16.31	12.09	0.48	32.11	61.42	无	1	2	2	0	1.4	85.89	1.38	63	60.65	46.75	59.6
1	吴力强	1	35	10.1	8.4	无	2	170	66	22.84	125	75	44.8	35.9	31.7	50.1	108.1	9.08	16.25	3.68	0.63	10.1	79.1	5.2	306.3	2.28	1.11	110.53	7.29	3.2724	8.4	#NULL!	15.34	13.42	0.85	56.42	26.49	无	2	1	2	0	1.34	91	2.67	67.25	63.1	45	65.4
1	张险峰	1	48	7.76	7	有	2	180	75	23.15	121	86	44.5	15.7	18.8	25.6	61.2	5.81	1.77	3.85	1.35	7.76	70.1	6.3	337	2.37	1.15	106.05	11.45	3.94898	7	20.95	16.65	14.56	0.41	29.16	46.47	无	1	2	2	0	1.53	94.92	0.598	55.25	54.35	46.4	60.45
1	赵国栋	1	64	4.44	6.2	有	2	160	72	28.12	108	80	43	23.6	22.4	20.1	62.9	2.43	1.42	0.67	1.5	4.44	95.7	7.2	347.7	2.2	1.18	71.95	10.99	2.16869	6.2	17.13	15.11	12.84	0.49	55.11	59.76	无	2	2	2	0	1.72	86.7	2.96	55.6	52.95	47.25	58.15
1	朱国华	1	45	6.75	7	有	2	182	95	28.68	136	94	42.84	68.6	28.5	90.8	74.8	3.12	0.95	1.88	0.88	6.75	62.4	6.3	189.4	2.24	1.46	113.58	6.81	2.043	7	18.4	16.91	14.29	0.13	42.28	29.36	有 非增殖期	2	2	1	0	1.97	62.36	2.73	57.75	58.75	48.9	57.6
1	张少楠	2	26	7.42	9.14	有	2	158	75	30.04	123	91	41.9	51.7	40.3	30.6	72.6	3.44	0.81	1.87	1.22	7.42	51.7	4.6	263.6	2.34	1.33	127.27	40.49	13.3527	9.14	#NULL!	10.68	16.46	0.74	66.69	48.07	无	1	2	1	0	2.06	101.8	2.92	59.8	58.35	52.45	67.1
1	杜亮波	1	41	14.95	8.6	有	2	170	85	29.41	135	97	45.1	12.1	12.7	23	82.3	4.13	4.39	2.86	0.7	14.95	82.7	4.9	498	2.37	1	100.85	19.86	13.1959	8.6	#NULL!	15.9	14.96	0.29	39.07	45.66	无	1	1	1	0	1.6	99.48	3.86	53.7	54.4	43.55	53.7
1	曹彦芳	2	63	5.63	7.5	2年	2	63	16.91	16.91	170	93	36.5	9.6	14.5	12.1	92.7	5.08	1.28	3.12	1.2	5.63	50.6	3.7	242.8	2.2	1.1	98.84	7.09	1.7741	7.5	17.92	16.95	11.59	0.4	42.35	50.17	无	1	2	2	0	1.21	76.4	0.8	59.9	54.05	52.9	62.95
1	王延民	1	58	7.22	8	无	3	174	88	29.07	154	92	41.72	35.9	42.3	60	82.8	4.32	3.45	2.5	1.05	7.22	67.9	5.36	354.56	2.26	1.46	100.13	#NULL!	#NULL!	8	#NULL!	19.48	10	0.3	36.6	43.18	无	1	2	2	1	1.42	77.96	1.07	50.85	59	44.8	57.15
1	烟硕	1	31	7.04	8.84177	无	3	180	101	31.17	170	113	43.5	32.9	21.5	130.3	62.1	4.82	3.8	3.3	0.74	7.04	76.7	4.4	358.2	2.25	1.4	115.11	#NULL!	#NULL!	8.8	#NULL!	9.56	14.49	0.51	33.33	49.28	非增殖期	1	1	1	0	#NULL!	#NULL!	#NULL!	54.1	54.15	46.2	63.15
1	朱风科	1	53	8.23	10.4	无	3	172	82	27.72	119	82	38.7	87.9	49.6	76.2	69.4	3.7	1.24	0.75	2.38	8.23	81.7	5.1	270.6	2.26	1.54	94.11	#NULL!	#NULL!	10.4	#NULL!	11.87	11.92	0.27	34.73	21.16	无	1	1	2	1	1.25	94.42	2.72	55.9	55.35	51.05	58.35
1	王彩芬	2	69	9.33	8.5	无	3	168	70	26.35	159	85	41.9	22.1	20.1	32.6	124.3	3.55	1.26	1.02	2.24	9.33	55.7	4.4	182.6	2.32	1.23	91.81	10.03	4.15911	8.5	24.61	22.82	25.57	0.94	69.16	49.14	无	1	1	2	0	1.36	87.19	2.17	55.5	56	55.5	55.75
1	朱会彬	1	55	7.61	6.6	无	3	#NULL!	#NULL!	#NULL!	128	78	39	16.6	21	44.7	68	7.27	3.96	4.94	1.13	7.61	88.2	5.3	322.6	2.14	1.06	84.6	4.67	1.5795	6.6	#NULL!	11.63	9.64	0.41	25.93	89.4	无	1	2	2	？	#NULL!	10.18	57.32	58.5	62.5	47	56.7
1	马京学	1	43	8.51	8.6	无	3	170	93	29.41	133	102	44	22	14.2	39.2	59.4	4.8	2	3.03	0.95	8.51	74.9	6.75	479.5	2.44	1.4	106.89	#NULL!	#NULL!	8.6	17.94	15.83	9.41	0.47	34.71	48.44	无	1	2	1	0	1.95	100.9	4.21	56.85	56.55	51.7	60.3
1	王敏	1	79	7.64	6.8	有	3	170	60	20.76	130	66	39.3	18.8	22.1	13.6	56.6	5.25	0.61	3.07	1.42	7.64	65.4	3.7	203.6	2.26	0.96	87.74	#NULL!	#NULL!	6.8	#NULL!	11.46	15.62	0.42	36.08	53.18	无	2	2	2	0	1.14	67.11	1.3	55	55	45	54.3
1	祖利锋	1	37	17.27	13.3	有	3	173	63	21.05	104	78	44.4	16.7	14.1	16.6	117.4	6.4	0.73	4.25	1.29	17.27	69.2	4.4	208.4	2.45	1.39	115.15	3.28	2.51758	13.3	#NULL!	23.91	15.41	0.58	51.22	48.43	无	1	1	2	0	1.66	126.7	0.934	55.5	58	46.5	59.65
1	杜文谦	1	51	5.43	5.5	有	3	172	60	20.28	122	77	41.5	10.2	16.4	20.8	67.3	4.4	0.65	1.35	2.55	5.43	80.9	3.5	328.7	2.37	0.87	96.63	7	1.68933	5.5	#NULL!	22.29	15.39	0.95	33.05	70.4	无	2	1	2	0	1.33	83.25	2.6	62	61.5	48	63.15
1	崔贺来	1	70	6.49	7.3	有	3	175	78	25.47	123	62	39.8	19.8	20.5	22.2	39.9	3.48	0.86	1.22	1.98	6.49	84.9	5.2	395.6	2.3	1.23	79.73	9.1	2.62484	7.3	22.19	7.05	12.22	0.15	26.51	53.76	无	2	2	2	2	1.59	76.46	3.89	55.5	56.5	46.5	52.1
1	张彦敏	1	60	10.85	8.2	有	3	172	82	27.72	157	108	44.8	14.7	17.4	42	97.6	4.97	1.89	3.2	1.13	10.85	84.5	5.83	270.9	2.45	1.11	86.06	7.46	3.59738	8.2	#NULL!	18.08	13.7	0.48	47.78	28.53	无	1	2	2	1	1.34	84.32	1.4	53.45	57.9	43.9	49.5
1	周立淼	1	67	6.23	7.4	有	3	173	82.5	27.57	143	80	35.7	19.4	17	16.8	70.8	4.69	1.06	2.89	1.32	6.23	71.9	5.34	348.9	2.25	1.45	91.79	5.16	1.42875	7.4	#NULL!	12.25	12.13	0.1	43.46	26.12	无	1	2	2	冠心病 不稳定心绞痛	1.03	62.28	2.32	53.3	52.9	43.6	51.6
1	刘涵	2	44	10.45	8.7	有	3	166	70	25.4	126	80	37.6	22.8	18.4	24.7	53.8	4.95	2.25	3.28	0.88	10.45	57.1	3.9	154.2	2.27	1.13	108.56	#NULL!	#NULL!	8.7	25.92	13.88	10.85	0.35	46.93	33.7	无	1	2	1	0	1.44	81.76	1.35	52	52.75	45.25	55.5
1	刘华芳	2	63	7.01	9	有	3	161	65	25.08	101	75	42.3	27	22	33.5	56.7	6.55	1.54	4.63	1.3	7.01	68.7	6.4	218.9	2.36	1.36	81.49	17.27	5.38056	9	30.36	19.68	13.85	0.25	32.45	35.57	无	1	2	2	0	1.41	84.29	10.06	57.6	56.3	43.55	57.15
1	张彦琴	1	62	7.45	7.1	有	3	171	76	25.99	141	71	44.2	17	17.6	22.7	134.3	5.17	1.01	3.21	1.35	7.45	64	7.77	242.3	2.37	1.09	89.42	10.57	3.49984	7.1	16.66	19.61	22.66	0.54	51.67	40.52	有	1	2	2	0	1.57	72.56	0.217	62.1	58.95	48.9	65.25
1	黄雪南	2	47	5.39	6.6	无	4	162	60	22.86	149	94	40.28	31.3	18.7	17.8	68.9	3.1	1.54	2.01	0.84	5.39	56.9	3.73	273.25	2.19	1.22	106.41	#NULL!	#NULL!	6.6	#NULL!	34.91	9.79	0.17	24.52	35.91	无	1	1	2	0	1.54	103.2	0.685	52.7	64.35	55	54.9
1	李世亮	1	63	7.28	8.1	无	4	170	75	25.95	118	71	42.9	13.7	20.8	14.9	56.9	6.2	0.82	3.81	1.63	7.28	72.5	6	246.5	2.27	0.94	94.11	#NULL!	#NULL!	8.1	#NULL!	#NULL!	#NULL!	#NULL!	#NULL!	#NULL!	无	2	1	2	0	1.63	102	1.01	55.7	58.4	43.9	58
1	兰晓辉	2	41	3.63	5.6	无	4	158	74	29.64	116	83	39.9	14.6	17.5	19	75.2	4.05	1.68	2.37	1.32	3.63	69.6	5.7	223.2	2.34	1.42	93.72	36.64	5.91125	5.6	14.09	13.61	17.17	0.45	55.98	44.85	无	1	2	1	0	1.75	94.81	1.2	59.5	61.4	51.9	63.85
1	苗龙兴	1	61	4.79	6.4	无	4	180	94	29.01	137	88	36.9	32.6	22.8	42.6	68.5	4.67	1.27	2.96	1.05	4.79	79.2	5	401.6	2.21	1.22	92.03	13.53	2.88039	6.4	#NULL!	17.58	16.66	0.33	38.07	36.87	无	2	2	2	0	1.48	109.9	0.807	53.7	53.85	44.55	59.2
1	王占久	1	59	6.32	6.5	无	4	175	80	26.12	146	89	38.9	13.8	15.7	35.9	60	3.97	1.04	2.56	0.95	6.32	134.6	9.6	333.6	2.16	1.24	49.32	7.33	#NULL!	6.5	19.13	23.86	14.35	0.5	53.31	50.2	无	2	2	2		1.41	71.78	0.786	55.2	58.75	45.8	59.4
1	陈晓宁	2	45	9.07	8	无	4	161	62	23.92	119	71	42.23	9	11.2	15.1	86.4	5.05	1.15	3.25	1.14	9.07	60.8	4.47	224.6	2.4	1.25	105.59	10.3	4.15204	8	#NULL!	12.18	12.04	0.49	32.08	39.94	无	1	2	2	0	1.54	88.51	4.92	54.95	58.35	47.25	65.45
1	王健	1	55	7.9	8.3	有	4	172	80	27.04	146	94	46.31	24.5	25.7	36	34.1	6.18	1.9	4.2	1.26	7.9	81.5	5.4	316.8	2.36	1.02	93.08	#NULL!	#NULL!	8.3	#NULL!	24.74	11.2	0.03	31.6	58.42	有 非增值性	1	2	2	0	1.9	107.3	3.46	54	57.2	45.15	54.7
1	谷小龙	1	32	8.5	9.4	有	4	183	95	28.37	138	85	43.8	306.2	142.8	132.4	80	5.63	3.3	3.85	0.97	8.5	75.3	4.5	347.1	2.28	1.63	115.17	#NULL!	#NULL!	9.4	#NULL!	#NULL!	#NULL!	#NULL!	#NULL!	#NULL!	无	2	1	2	0	1.71	98.13	2.03	58.5	58	43.5	53.5
1	田虹	2	58	7.68	6.9	无	5	162	52	19.81	125	88	44.9	16.8	14.9	18.1	83.8	6.79	1.62	4.63	1.32	7.68	47.6	4.4	254.2	2.28	1.35	104.45	#NULL!	#NULL!	6.9	#NULL!	25.03	18.71	0.49	49.35	38.98	无	2	2	2	0	0.958	60.13	1.93	59.75	58.25	51.85	54.95
1	张春芳	2	60	6.44	6.6	无	5	160	52	20.31	117	80	42.1	27.2	23	19.6	63.7	4.33	0.8	2.9	0.91	6.44	70.6	4	262.1	2.24	1.17	80.57	#NULL!	#NULL!	6.6	#NULL!	16.31	15.9	0.51	64.4	49.53	无	2	2	2	0	1.2	98.08	1.87	57.05	60.3	48.4	64.6
1	宋双印	1	47	9.48	8.4	无	5	160	70	27.34	112	88	43.6	12.5	14.4	16	99.9	3.9	0.99	2.52	1.05	9.48	77.5	3.9	191.6	2.35	0.99	102.46	6.29	2.65019	8.4	24.73	14.97	15.96	0.48	46.8	54.62	无	1	2	2	0	1.49	80.87	2.49	68.5	58.5	50	61.05
1	赵俊喜	2	61	8.2	12.2	无	5	160	55	21.48	144	80	38.5	10.8	15.4	15.6	95.3	4.98	1.45	2.99	1.24	8.2	53.5	5.7	276.3	2.25	1.39	98.42	0.992	0.361529	12.2	#NULL!	11.95	13.52	0.36	38.96	27.25	有	2	1	2	0	1.2	100.6	0.776	57.9	54.55	48.7	47.3
1	韩淑珍	2	69	7.31	7.5	无	5	176	80	26.91	142	74	35.6	23.1	20.1	21.6	73.4	3.42	0.96	1.27	1.84	7.31	58.4	5.8	365.8	2.13	1.35	90.4	8.35	2.71282	7.5	#NULL!	19.81	18.78	0.6	64.71	51.39	无	1	2	2	2	1.16	63.27	1.36	55.65	55.1	48.1	65.15
1	白金海	1	52	5.04	8.9	无	5	168	73	25.86	184	109	40.5	84	117.1	312.9	51.7	7.21	1.82	5.05	1.11	5.04	70.6	5.83	202.7	2.33	1.7	102.78	3.73	0.83552	8.9	#NULL!	13.69	7.55	0.12	30.63	27.47	无	1	2	1	1	1.14	70.24	3.57	53.85	54.25	44.7	52.65
1	袁庆生	1	60	4.49	6.6	无	5	172	74	25.01	103	69	43	9.6	17.1	6.2	54.2	6.48	1.26	4.44	1.3	4.49	111.6	6.3	416.4	2.44	1.2	61.45	3.3	0.658533	6.6	#NULL!	15.73	13.26	0.52	35.53	47.58	无	2	2	2	0	1.11	93.86	0.991	52.2	53.35	44.2	53.25
1	习立新	1	40	7.87	7.2	无	5	179	102	31.83	138	98	43.8	35.3	22	29.9	91.2	4.11	2.4	2.73	0.9	7.87	77.5	4.63	356	2.36	0.97	107.61	19.83	6.93609	7.2	20.93	23.38	11.37	0.05	38.3	35.19	无	1	2	1	0	1.41	94.13	2.16	56.95	59.45	45.6	54.25
1	李晓天	1	56	10.63	9.6	有	5	180	100	30.86	146	84	43.9	73.9	44.3	42.2	88.4	6.51	3.18	4.47	0.83	10.63	86.3	4.3	421.4	2.35	1.31	86.25	17.45	8.24416	9.6	#NULL!	10.56	11.16	0.29	40.86	38.99	无	1	2	1	0	1.81	98.56	2.05	53.55	53.1	43.65	56.05
1	刘冲	1	34	7.98	7.4	有	5	180	100	30.86	133	98	47	49.8	28.1	43.7	93.8	3.9	1.72	3.01	0.77	7.98	80.7	5.1	261.4	2.35	1.04	109.2	19.3	6.84507	7.4	#NULL!	10.13	16.4	0.39	56.82	54.71	无	1	2	1	0	2.3	111.6	1.63	55.7	53.45	49.05	50.65
1	张建辉	1	47	7.97	7.3	无	6	169	82	28.71	130	92	47.83	12.9	17.8	26.5	25.5	5.04	1.15	3.21	1.37	7.97	73.9	6.34	327.78	2.33	1.5	104.48	#NULL!	#NULL!	7.3	#NULL!	34.7	11.1	0.29	34.81	17.28	无	1	2	1	0	1.58	97.71	1.92	58.35	58.2	48.3	59
1	张胜	1	50	12.48	7.8	无	6	165	60	22.04	100	72	46.5	26.1	17.7	31.6	89.7	3.84	1.91	2.4	1.01	12.48	77.8	5.4	192.3	2.39	0.98	110.17	#NULL!	#NULL!	7.8	#NULL!	18.17	6.87	0.27	26.96	36.7	有	2	1	2	0	1.35	106.4	0.408	54.15	56.55	47.85	53.95
1	解崇玉	1	63	12.45	9.6	无	6	153	46	19.65	99	65	40.6	9.3	14.9	13	84.3	5.59	1.41	4.05	1.08	12.45	63	5.8	227.6	2.32	1.06	90.46	21.86	12.0959	9.6	#NULL!	28.38	16.72	0.4	33.92	29.22	无	2	2	2	0	1.13	89.32	2.1	58.9	57.05	47.85	60.4
1	王嘉婕	2	28	15.06	11.8	无	6	162	68	25.91	120	83	40.3	10.4	12.3	25.9	51.7	4.61	4.64	2.9	0.85	15.06	56.3	2.5	344	2.19	0.85	122.03	5.29	3.54077	11.8	#NULL!	#NULL!	#NULL!	#NULL!	#NULL!	#NULL!	无	2	1	2	0	1	82.23	4	54.3	54.2	45.1	57.3
1	付拴云	1	63	10.01	11.9	无	6	170	70	24.22	125	74	37.7	29.8	20.7	14	131.6	2.22	0.62	0.78	1.26	10.01	62.8	5.3	283	2.24	1.03	99.83	2.94	1.30797	11.9	49.89	23.39	8.64	0.35	32.47	28.96	无	1	1	2	0	1.06	81.21	1.01	54.95	55.3	46.1	51.85
1	李殿京	1	55	8.3	6	无	6	165	70	25.71	125	84	45.27	25.3	18.7	30.6	67.8	4.34	2.21	2.64	1.05	8.3	71.6	6.43	311	2.35	1.07	100.06	26.42	9.74604	6	14.06	20.56	11.28	0.46	32.97	45.86	无	1	2	2	0	1.89	98.51	1.13	58	58	49	58.35
1	李维英	2	71	6.65	6.5	无	6	160	74	28.91	121	84	40	14.4	29.3	12.9	53.5	5.61	1.37	3.59	1.18	6.65	63.6	5.1	315.9	2.22	0.93	84.55	#NULL!	#NULL!	6.5	19.49	22.38	11.37	0.27	41.03	41.12	无	1	2	2	0	1.41	61.85	3.91	57.85	53.4	48.45	55.25
1	解方淼	1	49	15.61	10	有	6	170	64	22.15	144	102	40.6	15.7	11.9	27.5	80.5	4.4	0.96	3.03	0.87	15.61	65.97	7.25	182.89	2.27	0.98	107.94	#NULL!	#NULL!	10	#NULL!	14.19	6.94	0.52	18.74	39.28	无	1	1	2	0	0.895	67.09	2.81	55.15	55.95	46.1	52.2
1	王增辰	1	54	4.76	11	有	6	164	69	25.65	115	70	42.2	16.5	18	16.9	79.4	4.15	1.19	2.47	1.16	4.76	79.7	7.9	232.2	2.27	1.44	96.42	0.865	0.182996	11	#NULL!	14.1	11.87	0.48	45.14	37.42	无	1	1	2	0	1.36	4.1	0.921	54.45	51.55	46.1	49.9
1	陈国英	1	70	8.89	8.2	有	6	160	65	25.39	143	75	40.5	13.3	17.8	14.4	77.7	3.27	1.4	1.32	1.78	8.89	73.8	5.1	316	2.28	1.34	71.18	#NULL!	#NULL!	8.2	#NULL!	19.5	13.9	0.16	35.85	59.8	无	1	2	2	0	1.2	72.49	4.32	62	58	54.5	64.25
1	刘树清	1	31	11.48	8.6	有	6	184	92.5	27.32	154	98	42.48	34.4	23.7	68.6	83.6	5.08	4.04	3.26	0.93	11.48	67.4	4.52	369.8	2.29	1.11	121.41	10.69	5.45428	8.6	#NULL!	12.35	14.04	0.18	59.45	49.73	无	1	1	1	0	1.25	78.27	1.81	57.6	58.95	45.75	62.45
1	侯文花	2	51	10.24	8.4	无	7	158	69	27.64	112	80	45.2	23.6	15.9	30.7	93.1	5.4	3.25	3.34	1.04	10.24	61.1	4.9	364.8	2.39	1.23	101.07	#NULL!	#NULL!	8.4	#NULL!	#NULL!	#NULL!	#NULL!	#NULL!	#NULL!	无	1	1	2	0	1.58	83.9	2.6	58.2	55.5	52.95	60.4
1	杨云	1	51	6.82	7	无	7	168	52	18.42	123	79	46.9	7.6	20.5	16.8	49.8	6.13	0.74	1.37	4.16	6.82	83.7	5.8	411.2	2.32	1.24	92.69	3.97	1.20335	7	#NULL!	25.61	12.44	0.26	27.91	36.1	无	2	2	2	0	1.34	90.58	3.56	60.6	57.65	47.7	59.15
1	赵勇军	1	45	9.34	6.5	无	7	178	86	27.14	137	91	44.4	32.7	21.3	32.1	64.9	4.92	3.86	3.29	0.84	9.34	98.1	6.07	304	2.33	1.02	79.78	#NULL!	#NULL!	6.5	18.56	18.34	15.9	0.07	46.54	21.19	无	1	2	2	0	1.5	82.94	2.05	57.45	58.5	43.3	59.95
1	高铁柱	1	40	7.68	8.7	无	7	174	86	28.41	117	71	40.8	158.4	107.6	90.8	65.5	5.51	3.44	3.82	0.82	7.68	63.8	4.6	357.3	2.21	1.2	116.58	7.57	2.58389	8.7	36.16	14.67	7.83	0.21	26.59	39.08	有	2	2	1	0	1.2	85.16	7.23	57.15	56.75	46.4	61.55
1	秦朋	1	34	11.88	9.4	无	7	180	91	28.09	119	77	46.5	77.1	44.9	35.3	113.1	3.38	3.99	2.23	0.59	11.88	66	4.9	267	2.24	0.82	119.91	14.94	#NULL!	9.4	31.55	24.27	10.52	#NULL!	#NULL!	28.77	无	1	1	1	0	1.56	119.7	1.2	57.7	59.85	46.7	59.75
1	董梅立	1	55	6.54	6.1	有	7	#NULL!	#NULL!	24.62	119	83	47.5	14.8	15.4	14.7	86.6	4.08	0.67	2.72	0.99	6.54	82	4.8	396	2.59	1.26	92.35	#NULL!	#NULL!	6.1	#NULL!	14.92	13.19	0.43	38.61	31.24	无	1	2	2	0	1.64	91.78	0.922	57	57	47	62.55
1	赵利山	1	33	8.74	10.6	有	7	180	95	29.32	136	82	40.2	43.7	30.5	32.7	76.2	4.77	2.26	3.07	0.8	8.74	66.4	3.8	403.1	2.15	1.27	120.46	6.91	2.68415	10.6	#NULL!	14.98	6.85	0.28	21.15	27.65	非增殖期	2	1	2	0	1.5	86.31	2.16	56.85	55.9	44.75	55.85
1	王立东	1	50	7.53	9.8	有	7	172	80	27.04	131	81	41.7	24	22.8	38.9	39.1	3.65	1.13	2.18	1.25	7.53	110.7	5.3	259.6	2.23	0.94	66.58	6.44	2.15525	9.8	#NULL!	13.49	10.5	0.24	29.4	49.56	有	1	1	2	0	1.44	76.42	1.71	52.35	51.3	43.55	59.05
1	薛祥武	1	73	6.15	8.2	有	7	172	73	24.68	141	67	39	17.3	19.9	19.3	86.7	5.04	1.62	1.03	3.24	6.15	74.1	7.7	284.6	2.2	1.2	86.94	#NULL!	#NULL!	8.2	#NULL!	33.08	8.36	0.11	21.81	30.8	无	1	2	2	2	1.51	96.29	2.09	52.35	51.8	44.5	56.15
1	叶梅	2	41	14.38	11.7	有	7	158	61	24.44	119	76	40.1	10.2	13.6	8.7	79.7	4.76	0.85	2.81	1.35	14.38	62.1	5.2	239.4	2.25	1.09	107.54	3.96	2.53088	11.7	#NULL!	20.69	8.87	0.15	37.11	43.64	有	1	1	2	0	1.16	90.32	4.25	61.4	56.1	48	51.9
1	谷亮	1	42	10.83	10.1	有	7	169	80	28.01	124	90	37.76	20.8	16.1	33	65.5	4.48	2.4	2.94	0.93	10.83	62.7	5.55	362.5	2.22	0.96	115.78	10.21	4.91441	10.1	#NULL!	21.42	8.28	0.22	21.01	20.13	有	1	1	2	0	1.66	91.61	0.761	62	57	46.5	62.1
1	马亚光	1	39	14.65	10.7	无	8	165	75	27.55	105	67	45.2	18.4	18.1	23.9	68	5.14	3.57	3.75	0.92	14.65	78.5	5.9	320	2.25	1.19	107.8	4.95	3.223	10.7	#NULL!	13.01	10.37	0.31	34.79	50.14	无	1	1	2	0	1.46	91.49	3.47	62.5	54.5	51	63.6
1	刘建国	1	70	5.77	6.3	无	8	165	70	25.71	169	83	43.1	35.5	38.9	38.1	69.4	5.9	1.41	1.53	3.71	5.77	85.6	5.4	467.6	2.32	1.04	78.94	12.33	3.16196	6.3	15.96	16.98	10	0.13	32.22	32.76	无	1	2	2	0	1.59	72.06	4.79	58.05	53.4	47.2	60.3
1	张壮军	1	46	6.98	7.3	有	8	170	85	29.14	106	73	43.5	24.5	21.4	25	72.1	4.37	2.85	2.85	0.89	6.98	80.8	3.5	232.7	2.26	1.29	100.25	89.68	27.8207	7.3	#NULL!	9.62	15.91	0.35	57.19	43.37	无	1	1	2	0	2.39	154.9	2.72	55.6	53.35	48.15	63.45
1	王兵海	1	56	12.88	10.4	有	8	165	80	29.38	161	89	45.2	15.4	10.6	22.1	113	5.67	13.01	2.95	0.58	12.88	75.2	5	251	2.29	1.34	97.38	5.87	3.36025	10.4	#NULL!	#NULL!	#NULL!	#NULL!	#NULL!	#NULL!	无	1	1	1	0	1.5	103.3	2.65	56.5	56.5	43.5	53.95
1	韩杰	1	50	7.62	7.9	有	8	178	98	30.39	146	103	40.7	16.6	16.9	36.7	73.6	5.28	2.74	3.66	0.97	7.62	83.8	4.5	396.3	2.24	0.93	93.28	25.29	8.56488	7.9	#NULL!	5.42	11.46	0.32	33.71	26.98	有	2	1	1	1	1.85	103.8	1.11	54.75	54.5	44.65	60.15
1	苗祥	1	32	10.46	7.9	无	9	182	100	30.49	137	72	42.9	39.2	27.1	81.5	82.5	5.26	7.92	2.97	0.94	10.46	66.4	4.7	569.8	2.41	1.43	121.3	#NULL!	#NULL!	7.9	#NULL!	16.86	6.61	0.18	24.77	25.05	无	1	1	1	0	1.52	93.2	2.62	58.35	56.3	44.05	58.35
1	段任江	1	55	7.6	6	有	9	173	95	31.74	147	84	40.7	16.4	22.4	19.4	50.1	4.59	0.61	2.92	1.28	7.6	75.07	6.58	356.47	2.22	0.9	98.13	#NULL!	#NULL!	6	#NULL!	19.85	11.35	0.29	30.22	46.51	无	2	2	2	0	1.47	88.53	1.71	62.4	57.35	45.85	53.4
1	李志亮	1	47	7.4	5.9	有	9	172	84	28.39	120	76	47.1	52.2	31.2	25.1	55.3	4.23	1.78	2.76	0.82	7.4	71.3	5.7	359.1	2.29	1.31	106.03	#NULL!	#NULL!	5.9	#NULL!	13.41	13.05	0.43	37.57	36.99	无	1	1	2	0	3.27	145.8	#NULL!	60	56.5	49.5	58.55
1	李桂茹	2	52	6.67	6.8	有	9	160	112	43.75	133	88	39.3	32.3	24.8	21.6	80.4	5.85	1.25	4.22	1.1	6.67	54.8	5.2	407.7	2.27	0.98	104.02	#NULL!	#NULL!	6.8	13.92	14.7	8.6	0.24	27.72	56.28	无	1	1	2	1	1.67	78.96	2.6	55.5	50	54.5	61.85
1	王金兰	2	54	13.32	10.8	有	9	155	66	27.47	130	66	41.9	16.2	19	33.9	69.4	5.49	0.92	1.49	3.76	13.32	49	4.2	243.2	2.33	0.93	106.39	8.71	5.15632	10.8	32.07	18.27	7.71	0.19	28.03	34.15	无	2	1	2	0	0.964	89.19	0.405	52.9	53.55	48.1	61.6
1	张素芹	2	54	6.44	8.6	有	9	163	82	30.86	118	79	44.5	14.4	16.8	21	136.1	5.17	2.29	1.06	3.46	6.44	70.3	6.9	265.5	2.4	1.34	84.47	#NULL!	#NULL!	8.6	#NULL!	10.33	29.1	0.98	87.63	50.55	非增殖期	1	1	2	1	1.62	99.23	4.3	55.5	56.5	46	57.25
1	张丽叶	2	52	17.49	10.8	无	10	159	71	28	28.08	158	40	19.8	17.7	18.4	88.1	4.84	0.79	3.25	1.03	17.49	66.2	5.03	188.37	2.22	1.11	92.12	4.06	3.15597	10.8	#NULL!	21.3	12.96	0.25	44.1	56.7	无	1	1	1	0	1.23	91.14	2.52	54.8	52.65	46.15	66.35
1	郝连绪	1	52	15.75	9	无	10	170	80	27.68	127	87	43.49	16.8	14	37.5	106	5.22	1.76	3.6	1	15.75	84.6	6.35	240.9	2.21	1.01	90.86	2.14	1.498	9	#NULL!	15.26	17.28	0.22	53.2	39.61	有 非增值性	1	1	2	0	1.78	92.2	1.06	61.85	57.65	45	57
1	王济川	1	64	11.29	7.1	无	10	170	75	25.95	136	86	45.6	17.7	17.5	28.1	68.9	3.87	2.47	2.53	0.73	11.29	77.8	5.1	270.2	2.31	0.95	90.78	17.65	8.85638	7.1	36.57	25.24	16.05	0.37	29.55	58.66	无	2	1	2	0	1.57	100.3	1.95	54.35	51.85	43.9	55.85
1	孙俊兰	2	58	8.81	7.8	无	10	160	60	23.4	148	94	43.5	28.1	21.6	23.6	54.4	3.57	1.53	2.66	0.9	8.81	61.1	10.2	335	2.35	1.09	96.21	23.31	9.12716	7.8	30.02	18.83	10.95	0.18	22.61	47.94	无	2	1	2	0	1.63	103.5	1.13	53.8	54.3	43.9	57.4
1	王军	1	56	5.24	6.2	无	10	165	58	21.3	126	79	42.2	11.7	16.1	14.4	71.4	3.88	1.19	2.44	1.05	5.24	74.6	5.4	302.4	2.28	1.11	97.7	6.82	1.5883	6.2	16.35	21.95	23.41	0.73	67.15	40.87	无	2	2	2	0	1.79	113.7	2	56	63	53	50
1	杨艳勇	1	40	10.77	9.3	有	10	170	66	22.84	131	96	43.7	28.4	22.4	41.2	92	6.01	3.17	3.87	1.2	10.77	75.56	7.92	366.23	2.4	1.48	108.75	8.92	4.26971	9.3	#NULL!	25.77	11.61	0.73	39.61	31.64	无	1	1	2	0	0.972	81.64	2.12	61.1	59.3	45.6	52.15
1	李然花	2	63	8.17	8.9	有	10	153	80	34.17	151	77	40.8	14.2	10.7	33.4	110.5	4.92	1.16	2.73	1.66	8.17	67	5.25	299.76	2.34	1.39	84.04	#NULL!	#NULL!	8.9	#NULL!	16.19	17.83	0.5	51.77	46.52	无	2	1	2	1	1.21	90.21	1.56	52.7	53	42.15	64.4
1	王增印	1	66	4.36	6.5	有	10	170	76	26.3	133	83	38.5	14.3	15.8	14.8	66.6	4.11	1.12	2.71	0.88	4.36	73.9	6.77	279.98	2.2	1.12	91.42	7.31	1.41652	6.5	#NULL!	30.5	8.98	0.18	27.88	32.56	无	2	2	1	0	1.68	89.48	1.4	52.5	55.55	46.2	52.5
1	孙伟信	1	43	14.71	10.8	有	10	160	60	35.94	120	82	44.8	10.7	13	20.9	97.8	5.76	1.22	3.72	1.3	14.71	72.9	5.4	209.7	2.34	1.02	108.06	2.99	1.9548	10.8	#NULL!	19.48	12.38	0.42	32.68	50.88	无	2	1	2	0	1.57	79.41	1.3	51.9	56.4	44.5	54.35
1	孟亚明	1	37	7.65	10.4	有	10	162	69	26.29	123	93	39.3	47.1	31.6	48.9	82.9	4.51	3.53	3.09	0.96	7.65	80.7	4.6	284.9	2.24	1.28	106.84	4.92	1.6728	10.4	28.67	16.48	14.59	0.32	57.89	26.15	无	1	1	2	0	1.6	89.14	0.437	54.95	57.75	45.45	57.7
1	霍建森	1	46	9.67	7.6	有	10	169	94	32.91	123	86	47.5	25.5	21.1	46.1	64.3	6	4.78	4.13	0.95	9.67	68.5	4.4	468.9	2.61	1.53	108.52	17.86	7.67583	7.6	#NULL!	8.88	10.02	0.21	22.92	48.68	有	1	2	2	0	1	63.68	3.06	52.9	53.55	52.15	57.75
1	郭晖	1	47	8.83	9.5	有	10	170	91	31.49	122	81	40.48	14	11.3	28.5	70.6	5.83	2.06	3.97	0.92	8.83	69	5.9	307.4	2.32	1.35	107.47	6.67	2.6176	9.5	#NULL!	19.35	12.59	0.46	36.09	18.94	有 非增值性	2	1	2	0	1.64	91.7	0.505	58	58.35	44.2	57.45
1	王军	2	71	7.38	7.1	有	10	165	100	36.73	148	82	38.04	16.8	18	20.9	81.8	3.64	1.46	2.28	0.89	7.38	78.9	5.53	355.6	2.19	1.22	65.2	#NULL!	#NULL!	7.1	#NULL!	17.59	12.6	0.16	60.94	48.61	无	1	1	2	1	1.33	78.99	3.06	53.5	55.5	46	57.75
1	郭彦平	2	59	4.55	6.4	有	10	164	60	26.03	87	53	45.3	27	32.2	37.1	59.3	4.68	2.07	2.99	1.18	4.55	76.5	7.9	338.4	2.42	1.25	73.63	#NULL!	#NULL!	6.4	#NULL!	20.51	18.17	0.54	39.9	39.48	无	1	1	2	0	1.54	99.31	6.37	54.95	57.3	46.55	61.85
1	于建合	1	56	4.96	8.9	有	10	176	74	23.89	114	73	37.6	15.4	16.7	16.8	100.7	6.01	0.87	3.89	1.65	4.96	63.8	4.8	311.3	2.18	0.85	104.18	0.549	0.121024	8.9	42.79	#NULL!	#NULL!	#NULL!	#NULL!	#NULL!	无	2	1	2	0	1.22	87.91	1.19	53	54.6	44.4	56.6
1	许立群	1	54	8.05	8.2	有	10	180	86	26.54	135	81	40.8	33.9	25.4	43	86.1	3.87	1.68	2.65	0.9	8.05	77.5	3.6	427.5	2.28	1.17	97.52	7.46	2.66902	8.2	34.32	16.73	24.56	0.58	70.09	55.87	无	1	1	1	0	1.54	101.2	0.686	56	56.5	45	53.1
1	谢巧雪	2	67	4.82	7.1	无	11	160	85	33.2	174	105	37	13.9	23.8	19.5	93.5	5.03	1.19	3.02	1.32	4.82	113.8	9.1	330.2	2.32	1.37	43.08	16.99	3.63964	7.1	#NULL!	12.56	29.92	0.79	85.06	43.48	有	2	2	2	0	1.45	81	2.06	63.15	61.8	46.35	57.2
1	岳素君	2	56	14.8	10.5	有	11	166	82	29.76	139	86	41.6	31.6	23.9	17.9	94.5	4.52	1.69	2.59	1.37	14.8	65	5	408.4	2.46	1.27	91.57	16.87	11.0967	10.5	#NULL!	15.29	19.57	0.35	58.16	36.93	无	1	1	1	0	1.75	14.08	1.06	59.2	54.35	49.95	61
1	裴志栋	1	54	13.88	9.4	有	11	176	80	25.83	112	76	44.7	15	15.2	49	80.2	5.95	2.21	1.01	4.21	13.88	65.2	5	374.2	2.38	0.85	104.72	12.37	7.63092	9.4	#NULL!	19.2	13.89	0.51	44.61	50.62	无	1	1	2	0	1.83	108.1	2.44	53.6	55.85	48.7	55.15
1	王润增	1	45	5.24	6.5	无	12	176	80	25.83	126	70	42.2	55.7	32.9	34.9	60.9	5.04	1.24	3.3	1.07	5.24	69.4	4.9	437.2	2.33	1.39	108.73	8.99	2.09367	6.5	36.51	20.54	13.31	0.27	33.98	34.99	无	1	2	2	0	#NULL!	#NULL!	#NULL!	57.35	55.2	46.2	59.65
1	冯克勤	1	51	7.44	5.7	有	12	178	89	28.09	157	91	48.7	19.2	17.6	77.3	59.1	4.25	1.84	2.47	1.26	7.44	65	5.51	355.6	2.36	1.12	107.09	#NULL!	#NULL!	5.7	12.77	18.01	8.59	0.32	29.89	77.97	无	1	1	2	1	1.46	78.82	2.39	55.35	57	45.35	63.4
1	苗树华	2	66	7.75	8.9	有	12	160	51	19.92	181	82	37.6	12.5	14.9	13.6	89.1	3.65	0.59	2.27	1.18	7.75	52.6	4.1	238.2	2.25	1.31	95.55	1.17	#NULL!	8.9	25.12	11.23	19.28	#NULL!	#NULL!	42.65	无	2	1	2	0	1.36	73.8	1.02	53.85	58.45	46.75	57.3
1	李春来	1	63	4.29	6.5	无	13	176	71	22.92	133	83	44.8	19.2	18.4	41.8	83.1	3.28	0.76	1.94	1	4.29	66.7	4.6	210.9	2.22	1.28	97.39	#NULL!	#NULL!	6.5	17.91	23.3	10.18	0.36	27.21	45.26	无	2	1	2	0	1.74	99.46	1.61	54.95	58.65	47.35	56.4
1	张克坚	1	56	9.06389	7.8	无	13	173	67	22.39	115	67	#NULL!	#NULL!	#NULL!		#NULL!	#NULL!	#NULL!	#NULL!	#NULL!	9.06	#NULL!	#NULL!	#NULL!	#NULL!	#NULL!	#NULL!	#NULL!	#NULL!	7.8	#NULL!	#NULL!	#NULL!	#NULL!	#NULL!	#NULL!	无	2	2	2	0	1.77	108.5	1.84	56.65	55.55	43.95	59.15
1	刘渝萍	2	65	6.85	8.3	无	13	159	67	26.5	129	70	39.86	23	15.3	20.1	102.1	5.87	4.05	3.82	1.07	6.85	53	4.38	211.5	2.29	1.15	95.99	13.97	4.25309	8.3	20.73	12.99	13.06	0.49	68.46	50.95	有	1	1	2	0	1.7	192.1	0.921	63.8	62.25	46.55	56.75
1	陈继明	1	64	9.06389	7.4	无	13	168	63	22.32	126	70	#NULL!	#NULL!	#NULL!		#NULL!	#NULL!	#NULL!	#NULL!	#NULL!	9.06	#NULL!	#NULL!	#NULL!	#NULL!	#NULL!	#NULL!	4.86	#NULL!	7.4	#NULL!	14.48	12.42	0.5	35.24	46.14	无	2	1	2	0	#NULL!	#NULL!	#NULL!	53.45	57.35	43.35	58.8
1	苗春青	1	55	5.09	6.5	有	13	172	77	26.03	139	70	38.1	20.6	20.3	21.9	69.5	4.56	1.44	2.95	0.9	5.09	71.8	3.4	202	2.06	0.88	99.95	9.04	2.04505	6.5	#NULL!	29.65	12.16	0.5	50.55	65.45	无	2	1	2	0	1.48	71.73	4.12	59.95	55.05	45.3	54.15
1	赵凤银	1	65	5.26	5.9	有	13	174	74	24.44	151	88	43.6	19	19.2	18.1	51.9	2.99	0.62	1.61	1.24	5.26	96.7	6.7	278.1	2.3	1.11	70.58	11.23	2.62532	5.9	15.73	39.58	8.86	0.22	24.52	43.79	无	2	2	2	0	1.32	90.9	0.448	59.8	59.8	48.8	58.75
1	杨爱文	1	48	10.97	7.8	有	13	170	77.5	26.82	140	99	47.9	28.6	20.8	48.9	78.8	4.43	1.84	3.23	0.82	10.97	80.3	7.4	262.7	2.31	1.12	99.54	#NULL!	#NULL!	7.8	#NULL!	15.51	11.83	0.43	33.89	42.73	非增值期	1	1	2	0	2.16	124	3.32	58.2	55	44.85	60.05
1	杜建萍	2	58	11.6	8.5	无	14	166	75	27.22	155	87	42	23.4	19.4	19.1	91.8	6.16	1.31	1.62	4.01	11.6	58.1	6	292.3	2.32	1.05	97.82	#NULL!	#NULL!	8.5	#NULL!	18.25	15.93	0.26	34.96	39.58	非增殖期	1	1	2	0	1.34	83.74	2.01	55.45	57.75	44.75	59.55
1	贺国友	1	54	6.5	8.6	有	14	173	74	24.73	116	71	41	17.4	15.8	22	52.9	2.85	1.27	1.64	0.85	6.5	68.96	3.02	335.97	2.29	1.09	102.33	#NULL!	#NULL!	8.6	#NULL!	#NULL!	#NULL!	#NULL!	#NULL!	#NULL!	有	1	1	2	1	1.8	119.5	3.43	53.65	55.75	45	55.35
1	王玉亮	1	60	3.94	8.6	有	14	190	95	26.32	163	84	42.45	16.3	12.4	19.1	68.1	5.05	1.08	3.34	0.89	3.94	100.9	8.16	280.1	2.28	1.23	69.42	8.71	1.52522	8.6	24.22	19.95	14.52	0.16	40.74	41.48	无	1	2	2	0	1.57	103.8	4.68	61	56.75	43.9	53.3
1	冯克刚	1	52	7.27	6.8	无	15	168	78	27.64	143	80	42.4	16.5	16.2	46.9	54.4	4.98	1.79	2.92	1.24	7.27	72.7	4.8	298	2.2	1.12	101.55	22.09	7.13752	6.8	#NULL!	10.37	14.07	0.5	42.76	45.61	无	1	2	2	0	1.28	58.04	1.15	61.35	357.35	52.1	57.6
1	赵英辉	2	43	5.96	6.4	无	15	163	61	22.96	108	73	39.8	13.1	14.9	17.7	37.3	4.78	0.72	2.79	1.47	5.96	65.9	4.4	342.3	2.27	1.22	98.67	8.88	2.35221	6.4	#NULL!	#NULL!	#NULL!	#NULL!	#NULL!	#NULL!	无	1	2	2	0	1.35	90	0.708	62.9	60.75	50.9	63.35
1	王大俭	2	77	7.95	7	有	15	165	77	28.28	170	90	43.8	22.1	34	50.7	135.7	4.68	0.93	2.95	1.32	7.95	68.3	5.2	268	2.24	1.15	74.42	5.6	1.97867	7	#NULL!	14.85	17.34	0.59	60.22	59.4	非增殖期	1	1	2	0	1.84	118.3	19.73	54.65	56.25	44.15	52.55
1	姜言军	1	58	6.84	6.9	有	15	183	75	22.4	112	72	43.1	24.6	26.3	39.4	66.3	4.4	0.98	2.63	1.2	6.84	79.8	5.1	247.8	2.22	1.08	93.7	16.86	5.12544	6.9	#NULL!	17.5	16.13	0.6	50.04	49.26	无	1	1	2	0	1.89	98.69	0.204	55.35	56.95	47.35	62.4
1	董艳茹	2	61	11.29	10.8	有	15	150	51	22.67	181	89	39.3	28.1	19.6	26.9	111.2	5.68	0.72	2.07	3.18	11.29	65.7	5.7	332.9	2.25	1.34	87.27	6.75	3.387	10.8	#NULL!	17.37	20.73	0.42	49.88	41.27	无	2	1	2	1	1.6	88.52	1.89	60.5	58.5	49.5	57.9
1	杨庆辉	1	56	4.95	6.2	无	16	172	62	20.96	111	77	39.12	9.4	10.4	11.7	70.8	5.38	1	3.77	1.05	4.95	76.3	6.81	332.2	2.2	1.16	96.8	3.33	0.7326	6.2	20.54	14.8	13.35	0.24	27.04	32.86	无	1	2	2	0	1.44	90.27	2.63	64.05	60.7	43.9	57.2
1	陈荣秀	2	70	8.09	6.7	有	16	153	50	21.36	143	65	44.8	17.8	22.6	12.1	83.5	6.02	1.14	3.71	1.78	8.09	68.8	4.4	291.9	2.5	1.4	77.48	#NULL!	#NULL!	6.7	#NULL!	15.15	25.54	0.6	56.78	61.59	无	1	2	2	0	1.36	92.03	3.63	59.4	51.25	46.8	51.7
1	任凤志	1	53	6.75	7.3	有	16	175	71	23.18	172	99	39.1	14.5	18.2	15.3	52.5	3.64	1.89	2.33	0.79	6.75	59.9	4.74	249.1	2.15	1.1	109.2	4.95	1.485	7.3	#NULL!	9.4	0.04	15.99	10.12	0.2	有	1	1	2	0	1.32	71.14	2	60.05	55.6	44.95	55.1
1	董贵玲	2	66	6.1	8.6	有	17	156	60	24.65	155	99	40.69	16.7	12.9	14.3	87.4	6.39	2.01	4.38	1.06	6.1	61.9	4.59	308.28	2.31	1.64	90.57	#NULL!	#NULL!	8.6	#NULL!	12.06	16.7	0.42	55.51	30.8	有	1	2	2	0	1.1	89.51	3.34	54.35	59.2	46	58.6
1	赵英建	1	59	5.39	6.1	有	17	168	59	20.9	135	79	45.5	20.2	19.5	13.6	76.3	3.63	0.7	2.14	1.32	5.39	72	5.1	304.4	2.36	1.17	97.05	2.36	0.565351	6.1	#NULL!	14.18	10.68	0.28	56.78	43.7	非增殖期	2	1	2	0	2.41	82.92	1.36	62.7	58.15	46.95	60.15
1	李丹丹	2	37	6.55	9.4	无	18	160	68	26.56	116	74	42.7	24.8	21.6	31.1	84.5	4.04	1.57	2.57	0.97	6.55	54.1	4.5	231.16	2.25	1.37	116.06	#NULL!	#NULL!	9.4	#NULL!	12.2	13	0.4	47.71	47.83	无	2	1	2	0	1.24	75.97	1.33	56.45	56.85	54.4	65.8
1	李烨	2	50	5.34	7.4	无	18	163	59	22.21	110	73	38.9	11.7	18.1	15.2	72.4	5.1	0.57	3	1.74	5.34	68.4	4.2	139.9	2.05	0.99	89.82	#NULL!	#NULL!	7.4	#NULL!	#NULL!	#NULL!	#NULL!	#NULL!	#NULL!	无	2	1	2	0	1.34	81.7	0.614	60	61.15	48.35	60.3
1	王金凯	1	70	5.95	8.1	有	18	175	82	27.72	147	78	40.2	11.3	18.3	32.732.7	126	4.04	1.2	1.13	2.57	5.95	72	4.6	240.2	2.23	0.79	89.86	#NULL!	#NULL!	8.1	#NULL!	19.5	17.02	0.55	52.31	52.18	无	1	2	2	0	2.15	108.8	1.31	64	57	44.5	55.7
1	马建武	1	51	6.38	8.84177	无	19	174	79	26.09	145	84	43	28.2	30.6	108.7	61.3	6.25	1.73	1.35	4.07	6.38	72.3	4.8	376.7	2.25	1.09	102.5	#NULL!	#NULL!	8.8	#NULL!	27.42	9.04	0.14	19.88	48.95	无	1	2	2	0	1.57	74.26	4.12	67	57.5	49	62.05
1	褚碧章	1	79	8.01	11	有	19	167	75	26.89	152	78	37.4	10.8	14.5	18.5	75.7	2.64	0.54	1.53	0.97	8.01	125.1	9.68	349.3	2.21	1.13	46.19	1.08	0.38448	11	#NULL!	8.6	15.17	0.04	40.06	33.33	有	2	1	2	冠心病 稳定型心绞痛	1.03	89.37	0.349	54.7	60.75	48	56.45
1	鲁国梁	1	66	3.87	10.1	无	20	178	74	23.4	142	77	37.9	9.8	24	12.5	50.8	4.46	0.68	1.21	3.02	3.87	78.2	6.6	337.4	2.41	0.76	89.34	3.66	0.62952	10.1	35.12	26.61	13.09	0.19	19.63	26.05	无	2	1	2	0	1.51	70.46	2.46	53.6	54.95	43.85	52.4
1	何三民	1	66	5.25	7.6	无	20	170	63	21.8	146	77	38.5	11.9	17.1	25.5	63.8	4.93	0.99	0.82	3.77	5.25	71.1	3.9	254.4	2.19	1.01	92.89	4.88	1.13867	7.6	24.77	13.41	10.12	0.3	22.76	47.92	无	2	1	2	0	1.55	94.57	2.97	59.65	52.3	47.6	54.95
1	易连祥	1	55	9.9	8.2	无	20	179	90	28.09	144	96	43.7	27.4	25.2	32.6	64.4	4.35	1.75	1.26	2.64	9.9	76.6	4.8	354.5	2.28	1.13	97.32	16.17	7.1148	8.2	18.56	16.29	12.56	0.27	31.99	37.08	无	1	1	1	1	1.36	73.67	1.27	54.2	52.65	44.15	58.75
1	张旭芳	1	55	10.34	8.9	无	20	170	75	25.95	164	89	48.1	16.8	16.5	31.6	61.2	4.7	3.68	0.85	3.11	10.34	88.7	7.6	421.1	2.46	1.07	84.02	46.63	21.4291	8.9	23.2	14.31	9.29	0.29	26.6	43.2	非增殖期	2	1	2	0	1.46	106.2	1.21	55.25	53.6	51.7	61.8
1	王志庭	1	58	10.17	8.7	无	20	172	80	27.04	131	75	40.8	17.9	17	17.9	67.2	4.72	3.35	3.46	0.75	10.17	85.7	6.7	305.5	2.29	0.97	86.25	11.09	5.01268	8.7	36.13	32.1	15.73	0.32	49.84	59.79	无	2	1	1	0	1.16	61.72	1.89	52.95	53.85	44.2	56.35
1	周忠义	1	59	10.43	8.1	有	20	178	89	28.09	125	72	44.7	33.9	22.9	47.5	69.1	4.9	3.46	3	0.81	10.43	84.7	7.5	337	2.38	1.07	86.38	#NULL!	#NULL!	8.1	#NULL!	#NULL!	#NULL!	#NULL!	#NULL!	#NULL!	有	1	1	2	0	1.78	129.9	2.12	53.55	54.25	43.95	57.9
1	邹世华	1	73	4.89	6.3	有	20	170	73.3	26.26	150	85	43.1	11.9	23.5	163.1	109.1	3.43	0.96	2	1.14	4.89	80.6	5.5	255.3	2.25	1	83.13	12.8	2.78187	6.3	#NULL!	26.63	10.65	0.26	33.51	36.53	无	2	1	2	0	1.49	85.86	1.57	59	54.35	44.25	50.95
1	陈造平	1	67	7.27	8.4	有	20	172	78	26.37	169	82	40.5	17.1	18.1	21	60.9	5.35	0.88	3.42	1.13	7.27	80.4	4.9	356.7	2.42	1.18	86.97	3.38	1.09212	8.4	#NULL!	26.92	9.79	0.28	34.35	24.74	无	1	2	2	0	1.57	76.45	1.11	60	55	44.5	55.4
1	许静庭	1	67	5.21	6.3	有	20	180	76	23.46	127	75	37.9	12.3	16	13	87.9	4.7	1.14	0.9	3.34	5.21	64	4.2	287.4	2.22	1.38	96.31	4.95	1.1462	6.3	#NULL!	27.43	22.14	0.8	72.23	34.37	无	2	2	2	0	1.52	67.38	1.62	57	54.5	43.5	54.55
1	董新平	1	61	11.1	8.3	有	20	173	84	28.07	143	81	44.5	18.2	18.2	18.5	137.3	4.7	1.41	2.97	1.06	11.1	69.4	3.74	278.5	2.29	0.89	97.17	#NULL!	#NULL!	8.3	26.36	15.78	12.25	0.14	38.45	32.84	无	2	1	2		1.47	65.19	1.34	53.4	53.3	43.4	63.35
1	宋建辉	2	55	4.6	7.9	有	20	160	72	28.12	142	65	39.91	16.3	28	46.1	135	3	2.24	1.79	0.78	4.6	248.7	15.31	261.8	2.23	1.52	18.21	#NULL!	#NULL!	7.9	#NULL!	#NULL!	#NULL!	#NULL!	#NULL!	#NULL!	未查	2	1	2	0	1.07	79.12	2.14	56.9	58.2	43.95	61.1
1	常敏	2	74	11.91	11.3	有	20	156	60	24.65	164	98	38.7	11.9	14.2	19.8	71.6	7.98	1.3	5.34	1.42	11.91	67.9	4.38	234.1	2.34	0.93	76.5	2.56	1.35509	11.3	33.81	14.9	14.48	0.17	37.15	64.59	无	2	1	2	0	1.56	119.4	1.04	58.55	55.8	42.95	58.95
1	荣军	1	62	12.53	8.9	无	21	170	85	29.41	144	96	42	25.9	19.5	27	97.3	4.02	0.72	1.17	2.4	12.53	74.5	6.4	214	2.36	1.1	93.7	11.07	6.16476	8.9	#NULL!	19.89	16.15	#NULL!	42.59	50.53	有	1	2	1	0	1.88	130.7	1.99	60.45	56.4	47.35	63.75
1	杜艳华	2	60	13.7	12	无	25	165	59	21.67	153	98	37.8	18.8	23.1	24.6	139.8	6.09	1.05	1.27	4.32	13.7	57.5	2.7	217.8	2.43	1.26	96.79	#NULL!	#NULL!	12	#NULL!	16.58	37.57	0.91	122.2	34.99	非增殖期	2	1	2	0	1.09	86.15	2.38	55.6	54.6	46.9	54.5
1	王惠荣	2	65	3.92	8.5	有	27	164	70	26.03	127	71	39.2	17.4	23.7	11	81.5	4.84	0.84	2.96	1.05	3.92	60.2	7.1	233.7	2.18	1.25	92.05	#NULL!	#NULL!	8.5	#NULL!	21.19	13.17	0.45	48.18	53.71	有	2	1	2	1	1.41	110	3.29	59.6	52.55	45.25	51.45
1	郭惠英	2	73	5.88	8.2	有	27	157	57	23.12	176	91	39.5	10.3	13.6	13.8	79.2	5.1	1.07	3.26	1.06	5.88	63.4	3.7	277.9	2.21	1.23	83.68	108.6	28.3808	8.2	19.79	23.72	21.55	0.78	65.59	53.93	无	1	1	2	1	1.14	77.82	2.67	54.35	56	45.45	53.45
1	孟战表	1	72	8.31	7.8	有	30	174	73	24.11	135	75	40.5	20.3	16.8	24	119.3	2.95	1.07	0.94	1.84	8.31	84.8	6.7	272.9	2.29	1.19	78.73	15.22	5.62125	7.8	#NULL!	19.95	10.54	0.15	25.92	21.92	有	1	1	2	1	1.63	79.99	1.11	53	54.25	46.55	57
2	张爱民	1	46	12.92	10.8	无	0.01	170	90	31.14	140	94	44.4	48.6	34.3	72.2	85.6	4.98	1.79	0.93	3.61	12.92	70.7	4.8	322.6	2.35	1.23	107.15	#NULL!	#NULL!	10.8	#NULL!	#NULL!	#NULL!	#NULL!	#NULL!	#NULL!	无	1	1	2	0	1.46	67.33	2.41	55	52.95	43.7	62.15
2	赵永海	1	44	18.83	9.5	有	0.01	170	89	30.8	142	83	42.2	17.9	17.4	19	91.3	3.54	1.52	2.41	0.8	18.83	67.5	4.3	314.8	2.22	0.92	110.75	14.16	11.8503	9.5	41.66	18.93	18.83	0.43	50.29	42.68	有	1	1	2	0	1.45	92.98	1.35	44	46.95	39.55	54.6
2	李彦荣	2	45	17.77	10.8	有	0.02	168	70	24.8	134	95	46.3	20	19	43.3	91.8	6.5	3.5	4.26	1.4	17.77	63	3.7	195	2.39	1.13	102.79	14.46	11.4202	10.8	#NULL!	17.46	8.09	0.27	23.69	64.57	无	2	1	2	0	1.38	81.53	2.7	60.1	53	42.65	62.35
2	张栋才	1	73	6.83	9.7	有	0.02	178	71	22.41	124	77	39.4	16.2	49.2	25.2	87.9	4.61	0.65	3.11	1.23	6.83	71.94	6.29	213.77	2.21	1.07	88	10.47	3.17823	9.7	#NULL!	15.8	11.72	0.3	33.24	46.73	无	1	1	2	0	1.34	87.99	3.5	55.55	52.35	37.1	57.7
2	焦彦虎	1	46	13.65	13.4	有	0.02	172	76	25.69	120	76	36.2	10.4	13.2	11	133.2	3.55	1.8	0.56	2.44	13.65	67.2	6.3	438	2.12	0.92	109.41	9.21	5.5874	13.4	31.04	14.96	15.77	0.34	41.97	25.93	非增殖期	2	1	2	1	1.58	82.5	1.45	44.3	46.3	40.7	45.8
2	闫明拴	1	46	12.52	8.84177	有	0.05	#NULL!	80	27.68	106	70	38.2	9.9	11.5	15.6	94.6	5.8	1.63	4.04	0.93	12.52	71.5	5.4	174.8	2.26	1.16	106.63	8.78	4.88558	8.8	#NULL!	31.82	13.47	0.58	35.31	26.46	无	2	1	1	0	1.11	74.9	1.05	54.15	48.9	38.8	56.8
2	张兰利	1	55	5.74	9.7	有	0.09	178	67	24.36	176	121	36.62	21	18	42.1	91.4	4.76	2.31	3.15	1.01	5.74	72.9	5.03	339.79	2.24	1.1	99.32	#NULL!	#NULL!	9.7	#NULL!	20.45	10.64	0.51	35.66	45.08	无	1	2	2	0	1.43	83.87	1.71	59.3	54.65	42.85	59.85
2	刘伟	1	47	12.81	11.2	有	0.1	175	85	27.76	126	85	42.7	26.2	29.6	54.3	89.8	4.76	2.49	3.5	0.81	12.81	93.2	5.9	402.6	2.29	0.89	83.66	15.15	8.6254	11.2	38.26	17.28	14.53	0.51	28.59	80.44	无	1	2	1	0	1.3	91.91	1.44	53.1	52.7	44.05	62.85
2	薛恃峰	1	35	11.25	12.3	有	0.1	170	85	29.41	123	75	38.1	20.6	16.4	30.3	81	5.44	1.75	0.9	3.94	11.25	63.3	3.8	423.6	2.17	1.46	121.14	13.35	6.675	12.3	#NULL!	13.01	15.73	0.6	53.42	43.02	无	1	1	2	0	1.35	68.72	1.8	50.15	53.4	45.9	58.05
2	程远英	2	55	17.3	12.4	有	0.1	157	58	23.53	157	107	45.8	16.7	19.6	34.1	157.5	6.72	2.53	4.19	1.22	17.3	57.3	5.2	217.3	2.41	1.08	100.36	9.65	7.41978	12.4	#NULL!	13.05	14.01	0.43	42.01	46.52	有	1	1	2	0	1.35	88.2	3.18	45.25	45.5	38.15	45.8
2	党晋云	1	66	10.47	13.9	有	0.11	174	84	27.74	162	94	38.2	28.5	29.4	27.2	77	5.45	1.32	1.37	3.81	10.47	77.5	4.4	268.8	2.41	1	89.65	4.2	1.9544	13.9	45.76	16.64	10.37	0.36	35.97	45.07	无	1	1	2	0	1.68	108.2	4.09	47.4	48.9	39	45.95
2	彭建菊	2	56	16.38	13	有	0.2	157	65	26.37	104	65	40.5	32.3	31.2	28.5	72.1	3.96	0.81	2.74	0.97	16.38	64.1	5.6	277.2	2.32	1.23	93.06	5.38	3.91664	13	#NULL!	14.68	10.86	0.3	44.94	30.67	非增值期	1	1	2	0	1.38	82.56	2.94	54.35	53.35	47.25	62.7
2	王贵荣	1	77	12.48	12.5	有	0.2	159	65	25.71	115	63	36.2	14.9	26.9	14.6	48.1	2.46	2.29	1.26	0.67	12.48	92	7.6	286.5	2.29	0.92	68.88	#NULL!	#NULL!	12.5	#NULL!	16.92	6.55	0.12	22.19	20.28	无	2	1	2	0	1.27	79.99	3.61	53.4	54.95	36.85	48.55
2	王建刚	1	60	9.71	14	有	0.2	176	76	25.18	128	73	36.1	25.3	30.1	14.4	81.1	3.6	1.61	2.14	0.8	9.71	101.1	7.1	367	2.29	1.29	69.25	18.51	7.98809	14	#NULL!	#NULL!	#NULL!	#NULL!	#NULL!	#NULL!	无	1	2	2	1	1.06	91.91	2.01	47.85	47.25	41.7	44.75
2	贾超	1	30	8.67	11.8	有	0.3	183	95	28.37	134	91	38.7	29.1	25.2	79.2	96.9	5.35	4.23	3.36	0.96	8.67	60.24	6.52	455.91	2.24	1.72	128.05	#NULL!	#NULL!	11.8	#NULL!	12.78	11.67	0.39	41.92	67.16	无	1	1	1	0	1.77	80.69	2.33	54.25	54.6	42.05	62.95
2	于彦辉	1	48	5.45	6.5	有	0.3	172	108	36.51	125	74	43	20.5	16.5	51.1	117	4.29	1.31	1.01	2.94	5.45	79.8	6	407.4	2.28	1.25	100.52	29.51	7.14798	6.5	12.93	23.3	9.15	0.19	28.96	52.01	无	2	2	1	0	1.3	65.8	1.52	57.35	55.95	46.1	55.75
2	王立明	1	38	5.6	10.5	有	0.4	158	76	30.44	151	106	38.9	43	40.4	56.9	103.7	3.67	1.62	2.33	0.86	5.6	66	4.1	248.4	2.26	1.13	116.59	13.12	3.26542	10.5	#NULL!	22.15	16.26	0.78	52.33	51.88	无	1	1	1	0	#NULL!	0	1.49	56	54	45.5	62
2	王忠阳	1	29	8.1	14.6	有	0.5	175	117	38.2	167	118	42.4	26.2	23.5	25.7	131.5	6.04	2.11	3.88	1.04	8.1	74.7	5.2	402.8	2.42	1.44	118.04	5.21	1.8756	14.6	#NULL!	#NULL!	#NULL!	#NULL!	#NULL!	#NULL!	无	1	2	1	0	1.41	90.26	4.31	50.95	52.1	39.9	55.45
2	王昌法	1	45	10.69	10.1	有	0.6	172	107	36.17	135	95	47.42	33.7	28	38.2	107.1	5.98	2.78	3.75	1.17	10.69	83.4	5.58	493.6	2.47	1.15	97.11	#NULL!	#NULL!	10.1	24.47	25.62	11.44	0.39	33.62	58.07	无	1	2	1	0	1.64	86.02	1.74	61.65	53.65	43.9	63.6
2	姚保然	2	52	16.77	12.4	有	0.6	167	61	21.87	159	81	42.5	18.7	16.6	23.4	99.6	5.97	1.32	1.17	4.15	16.77	58.3	7.2	221.7	2.45	1.21	101.94	3.4	2.53413	12.4	#NULL!	12.69	19.83	0.93	68.54	43.37	无	1	1	2	0	1.3	87.62	1.76	57.65	46.1	43.45	53.65
2	郭三平	1	56	11.33	10.6	有	1	175	95	31.02	138	73	39.9	11.1	12.3	17.9	48.7	4.18	0.7	2.77	1.36	11.33	76.2	6.7	204	2.24	1.18	96.84	8.81	4.43632	10.6	#NULL!	16.58	20.9	0.45	43.21	33.12	无	1	1	2	1	1.76	115.1	1.38	54.15	52.3	41.5	56.1
2	韩军基	1	50	10	8.84177	有	1	178	90	28.41	111	78	41.4	19	17.9	18	93.4	4	6.62	0.54	2.39	10	78	8.2	186.8	2.14	1.14	100.05	#NULL!	#NULL!	8.8	#NULL!	10.09	17.93	0.44	68.94	30.24	无	1	1	2	0	1.3	106.1	0.624	57	56	42	53.35
2	张建菊	2	53	9.13	7.1	有	1	165	73	26.81	146	89	43.6	46.5	31.1	33.5	61.7	5.21	5.35	3.42	0.86	9.13	62.4	6.2	415.6	2.38	1.29	98.25	19.1	7.75036	7.1	35.26	21.4	18.82	0.72	58.74	38.78	无	2	1	2	0	1.26	91.43	3.02	57	55.05	44.7	57.3
2	马振华	1	42	19.94	12.5	有	1	168	65	23.03	96	73	42.6	38.9	30.3	55	91.6	4.66	1.07	3.4	0.95	19.94	81.3	6.2	370.6	2.37	1.21	102.25	3.38	2.99543	12.5	#NULL!	12.76	12.18	0.3	28.26	33.25	无	1	1	2	0	3.61	111.3	0.426	55.3	54.7	39.8	53.55
2	常玉荣	2	58	6.02	7.8	无	1	113	75	27.06	113	75	44.8	37.8	34.6	39.9	129.2	5.58	1.56	3.64	1.29	6.02	74.5	5.29	453.6	2.32	1.17	76.56	#NULL!	#NULL!	7.8	#NULL!	16.12	27.1	0.57	83	62.02	无	1	2	2	0	1.81	102.8	3.06	61.8	63.8	46.4	65.35
2	徐宁	2	56	6.87	7	无	1	166	75	27.22	108	69	41.1	114.2	66.9	75.2	100.5	6.55	1.42	4.46	1.28	6.87	69.4	3.8	322.1	2.32	1.48	84.66	9.77	2.98311	7	#NULL!	10.98	15.21	0.44	40.02	26.55	无	2	2	2	0	1.6	78.22	9.2	64.8	54.6	50.5	59.45
2	张珠峰	1	33	12.95	9.9	有	1	181	100	30.52	147	111	44.6	38.5	37.1	75	136.5	5.39	2.58	3.41	0.99	12.95	81.8	4.38	404.3	2.47	1.04	108.12	#NULL!	#NULL!	9.9	#NULL!	16.66	10.99	0.44	37.6	70.23	无	1	1	1	0	1.73	120.4	2.8	54.2	54.8	39.9	58.7
2	林田雨	1	28	9.06389	8.84177	有	1	183	88	26.28	135	84	#NULL!	0	#NULL!		#NULL!	0	#NULL!	#NULL!	#NULL!	9.06	#NULL!	0	#NULL!	0	#NULL!	#NULL!	4.09	#NULL!	8.8	#NULL!	16.54	9.29	0.38	29.71	29.67	有	1	1	2	0	1.99	94.78	1.37	51	59	41.5	52.3
2	史俊河	1	49	5.64	9.8	有	1	178	80	25.25	135	85	39.9	15.9	13.4	28.3	109.9	4.53	0.96	2.67	1.1	5.64	82.9	8.1	415.2	1.16	0.93	95.1	4.14	1.03776	9.8	#NULL!	10.89	15.58	0.54	31.94	51.45	无	2	1	2	0	1.75	107.1	2.05	51.5	54	43	52.15
2	任建国	1	63	5	9.2	有	1	175	80	26.12	115	63	34.3	20.3	16.6	26.9	62.3	3	0.68	1.73	0.93	5	135.7	9	407.2	2.25	1.25	47.5	3.95	0.877778	9.2	#NULL!	#NULL!	#NULL!	#NULL!	#NULL!	#NULL!	有	2	1	2	0	3.38	82.61	0.364	47.25	45.75	#NULL!	53
2	刘海正	1	57	7.45	5.5	有	2	170	79	27.34	151	89	45.4	34.7	51.7	63.9	56	5.22	1.43	3.15	1.43	7.45	73.8	2.6	314.8	2.33	1.34	97.45	#NULL!	#NULL!	5.5	#NULL!	16.34	16.05	0.54	50.54	37.11	无	2	2	2	0	2.18	99.94	1.49	53.35	57.6	42.3	45.65
2	崔卫江	1	47	8.62	7.5	有	2	181	75	22.9	103	64	43.6	29.5	23.8	74.9	52.4	4.7	2.53	3.22	0.97	8.62	70.8	4.2	393	2.33	1.18	106.33	4.96	#NULL!	7.5	#NULL!	22.38	11.32	#NULL!	#NULL!	42.45	无	1	1	2	0	1.89	102.5	2.55	59.45	58.9	41.55	50.55
2	翁桂岚	2	74	4.56	6.2	有	2	150	47	20.89	124	54	41	10.4	19.2	14.1	51.8	6.37	0.62	1.45	4.28	4.56	67.4	4.6	322.6	2.32	1.3	77.23	#NULL!	#NULL!	6.2	#NULL!	27.66	17.03	0.6	52.38	34.12	无	2	2	2	0	1.43	84.16	1.19	58.5	57.5	52	58.8
2	李明廷	2	52	10.79	6.7	有	2	160	68	26.56	118	88	45.3	11.6	12.8	54.6	95.2	5.88	1.02	3.74	1.21	10.79	49.8	4.4	401.6	2.51	1.44	107.34	13.04	6.2534	6.7	#NULL!	16.63	17.65	0.51	49.82	25.61	无	2	1	2	0	2.07	131.6	2.51	49.5	48	39	50
2	王素英	2	66	30.7	10.1	有	3	168	0	#NULL!	185	102	43.1	14.5	16.5	20.5	113.4	6.58	1.42	3.99	1.52	30.7	61.2	3.9	305.4	2.5	1.31	90.91	10.91	14.8861	10.1	#NULL!	15.16	14.4	0.37	35.49	43.09	无	2	1	2	0	1.32	103.7	0.916	56.5	56	45	50.2
2	邱玉生	1	56	6.39	8.6	有	3	183	82	24.49	112	78	35.2	41.8	48.7	199.7	73.7	5.72	2.54	0.91	3.94	6.39	68.1	4.2	302.6	2.16	1.17	101.43	#NULL!	#NULL!	8.6	#NULL!	#NULL!	#NULL!	#NULL!	#NULL!	#NULL!	无	1	2	2	0	2.04	95.75	1.73	57.5	53.5	46	59.1
2	安晓莉	2	40	6.67	8.8	无	3	156	64	25	135	88	42.4	23.4	20.9	47.2	89.6	3.91	1.35	0.92	2.6	6.67	64.8	4.5	476.1	2.26	1.28	102.84	#NULL!	#NULL!	8.8	#NULL!	14.81	12.49	0.25	30.16	61.04	无	1	1	2	0	1.37	91.95	2.49	57.1	61.65	46.35	67.9
2	柳明长	1	57	15.57	13.1	无	3	169	72	25.21	113	57	35.6	8.2	10.3	24.3	64.9	4.52	1.36	0.98	3.21	15.57	76.4	4	193.3	2.15	1.22	96.08	7.46	5.16232	13.1	#NULL!	12.29	15.11	0.38	42.19	32.77	无	1	1	2	0	1.49	78.55	1.32	52.4	51.5	43.4	58.3
2	刘亚东	2	28	7.73	7.4	有	3	160	66	25.78	126	83	40.4	25	17.2	17.5	68.3	3.34	1.38	0.9	3.18	7.73	49	4.6	344.9	2.23	1.33	127.71	18.37	6.31112	7.4	#NULL!	#NULL!	#NULL!	#NULL!	#NULL!	#NULL!	无	1	1	2	0	1.76	99.92	1.89	50.15	56.05	44.05	57.2
2	石军	1	47	14.76	10.2	有	3	175	82	27.08	120	80	42	24.4	16.4	38.3	68.9	4.3	1.46	3.12	0.91	14.76	74.1	4.3	216.7	2.17	1.05	104.36	16.96	#NULL!	10.2	28.31	23.45	14.86	#NULL!	#NULL!	26.89	无	1	1	1	0	1.71	106.8	1.08	54.85	53.3	41	55.6
2	史灵先	2	64	10.69	7.7	有	3	148	60.5	27.62	176	97	41.7	11	17.8	18.6	103	8.71	8.09	4.81	1.02	10.69	97.2	12.91	354.2	2.46	1.15	53.25	#NULL!	#NULL!	7.7	#NULL!	#NULL!	#NULL!	#NULL!	#NULL!	#NULL!	有 非增值性	2	1	2	0	0.976	80	5.68	57.5	55.5	43.5	62.2
2	雷兰勤	2	68	8.35	8.1	有	3	166	75	27.22	113	78	43.7	20.8	23	62.3	125.3	6.28	2.49	4.51	1.17	8.35	73.2	4.2	223.7	2.34	1.26	72.91	22.76	8.44649	8.1	#NULL!	10.52	20.82	0.4	46.95	36.62	无	1	2	2	0	1.46	74.33	4.61	47.95	55.05	47.9	57.9
2	李占元	1	68	10.43	9.3	有	3	172	60	20.28	157	96	#NULL!	0	#NULL!		#NULL!	0	2.01	#NULL!	#NULL!	10.43	#NULL!	0	#NULL!	0	#NULL!	#NULL!	4.43	2.05355	9.3	#NULL!	13.31	25.88	0.95	88.71	35.53	有	2	1	2	0	1.53	119.2	1.11	51.7	48.9	37.75	47.25
2	穆红政	1	41	6.59	8.2	有	3	172	85	28.73	162	102	37.2	44.7	30.3	32.4	44.9	4.36	2.41	2.83	0.71	6.59	78	5.4	241.3	2.17	1.02	106.56	#NULL!	#NULL!	8.2	#NULL!	#NULL!	#NULL!	#NULL!	#NULL!	#NULL!	有	2	1	2	0	1.39	78.58	3.68	46.45	46.2	43.6	54.3
2	李大领	1	64	6.11	7	有	3	173	93	31.07	122	82	40	12.3	17.1	27.3	35.3	5.3	0.73	3.51	1.22	6.11	69.32	5.47	327.1	2.33	1.21	95.19	105.4	28.622	7	#NULL!	22.4	14.42	0.37	61.89	53.35	无	1	1	2	0	1.6	97.4	2.05	56.4	47.75	46.8	#NULL!
2	梁成栓	1	61	6.2	5.6	有	4	175	95	31.02	144	79	42.6	16.2	37.8	164.2	79.3	2.57	1.12	1.31	1.08	6.2	59.8	2.5	460	2.32	1	103.28	#NULL!	#NULL!	5.6	#NULL!	12.98	13.05	0.27	33.23	54.14	无	1	2	2	0	1.69	88.45	4.11	52.8	54.05	37.65	49.7
2	刘秀珍	2	74	7.35	8	有	4	155	64	26.64	134	84	41.4	11.1	15.7	17.5	76.1	3.36	1.36	2.13	0.95	7.35	61.1	6.1	275.9	2.35	1.17	85.99	17.29	5.64807	8	#NULL!	15.28	22.78	1.04	83.37	61.36	非增值期	2	2	2	0	1.64	79.98	2.72	59.6	54.05	47	53.3
2	周吉阳	1	38	7.56	9.8	有	4	180	90	27.78	172	100	43.9	15.9	14.9	17.5	71.3	5.57	4.19	3.76	0.82	7.56	130	6.9	330.5	2.23	1.21	59.66	#NULL!	#NULL!	9.8	#NULL!	#NULL!	#NULL!	#NULL!	#NULL!	#NULL!	有	1	1	2	0	1.39	105.2	0.964	48.35	55.05	40.45	55.05
2	韩金花	2	55	3.71	9.4	有	4	156	51	20.96	129	85	30.8	27.1	66.3	163.4	361.8	5.23	1.21	3.44	1.24	3.71	52.9	4.86	197.8	2.19	1.52	103.03	#NULL!	#NULL!	9.4	53.44	15.4	15.3	0.42	40.2	13.83	无	2	1	2	0	1.26	105.8	0.707	46.4	48.35	39.95	52.3
2	董新民	1	64	14.53	9.8	有	5	176	95	30.67	121	76	42.5	38.2	24.1	48.6	76.2	4.04	2.81	0.88	2.62	14.53	77.5	5.5	466.1	2.38	1.29	90.91	19.97	12.8962	9.8	#NULL!	28.58	8.77	0.15	30.44	25.75	糖网病？	2	1	2	2	2.13	91.82	1.77	56	53	43.45	53.8
2	岳文峰	1	48	7.56	7.9	有	5	185	105	30.68	133	100	38.5	40.3	38.6	155.8	82.2	4.8	2.67	2.99	0.87	7.56	57.8	2.7	348.8	2.25	1.03	114.75	10.01	3.36336	7.9	#NULL!	20.02	10.62	0.67	32	45.36	无	2	1	1	1	1.34	109.4	1.48	54.25	53.4	37.85	53.2
2	宋玉梅	2	67	12.58	7.5	有	5	160	68	26.56	161	105	37.1	11.9	11.3	18.4	74.8	3.49	0.63	1.04	2.11	12.58	166.1	12.6	322.7	2.29	1.29	27.26	#NULL!	#NULL!	7.5	#NULL!	#NULL!	#NULL!	#NULL!	#NULL!	#NULL!	有（现无）	2	1	2	0	1.13	83.2	4.38	61.35	49.3	45.95	55
2	贾文海	1	52	10.97	8.84177	有	5	177	92	29.37	136	91	37.4	18	14.7	34.8	95.5	5.39	1.92	3.75	0.83	10.97	62.6	5.12	425.8	2.26	1.35	108.01	6.03	2.93996	8.8	#NULL!	15.89	14.1	0.17	37.56	41.58	无	1	1	2	0	#NULL!	0	#NULL!	52.15	50.35	39.95	44.95
2	孟秀荣	2	51	16.07	10.2	有	5	176	80	25.83	130	90	44.2	11.7	10.1	14	70.9	5.1	1.93	3.59	0.98	16.07	51.8	6	204.9	2.2	1.09	106.73	3.58	2.55692	10.2	#NULL!	13.83	11.88	#NULL!	#NULL!	35.14	有	1	1	2	0	1.4	86.94	1.6	52.95	50.3	38.15	58.35
2	王林	1	60	9.63	7.5	有	5	172	72	24.34	156	78	#NULL!	0	#NULL!		#NULL!	4.38	0.87	2.64	1.28	9.63	78	4.8	326.2	0	#NULL!	93.27	#NULL!	#NULL!	7.5	#NULL!	6.11	9.13	0.22	58.21	27.26	增殖期	1	2	2	1	1.55	103.5	5.05	47.45	53.15	39.65	43.6
2	王瑞雪	1	67	5.63	7.7	有	6	172	75	25.35	133	88	44.6	12	22.6	18.8	55.9	4.6	0.81	2.92	1.23	5.63	94.5	5.5	282.9	2.31	0.81	71.51	#NULL!	#NULL!	7.7	#NULL!	17.14	11.12	0.18	19.98	58.63	无	2	1	2	2	1.17	91.43	2.74	54.5	58.6	46.05	54.55
2	史冬菊	2	66	9.06389	8.84177	有	6	150	60	26.67	122	81	#NULL!	0	#NULL!		#NULL!	0	#NULL!	#NULL!	#NULL!	9.06	#NULL!	0	#NULL!	0	#NULL!	#NULL!	#NULL!	#NULL!	8.8	#NULL!	22.7	16.3	0.64	74.88	27.12	无	1	1	2	0	#NULL!	0	#NULL!	61.3	53	43.15	55.55
2	李风芹	2	76	9.78	8.9	有	6	155	70	29.14	117	75	44.3	15.3	19.7	20	88.6	5.43	6.09	3.47	0.91	9.78	79.9	9.3	355	2.43	0.74	62	13.71	5.95928	8.9	#NULL!	12	15.9	0.31	34.88	49.44	无	2	2	2	1	1.42	101.5	2.32	62.75	56.45	46.6	47.6
2	夏秀会	2	62	9.06389	11.5	有	6	153	69	25.2	138	86	#NULL!	0	#NULL!		#NULL!	0	#NULL!	#NULL!	#NULL!	9.06	57	3.19	#NULL!	2.24	#NULL!	#NULL!	3.34	#NULL!	11.5	37.63	16.25	7.42	0.5	21.58	18.6	有	2	1	2	0	#NULL!	0	#NULL!	56.35	51.3	43.3	57.15
2	周跃琴	2	80	12.92	7.7	有	6	163	77	28.98	163	87	43.6	20.5	21.8	15.5	70.4	5.04	1.39	3.4	0.96	12.92	88.4	9.1	344.6	2.62	1.37	52.6	28.81	16.5433	7.7	#NULL!	14.05	13.6	0.2	35.83	18.7	无	1	2	2	0	1.73	100.9	1.94	55	48.5	47.5	51.15
2	郑斌	1	37	5.91	9.1	有	6	174	53	17.51	134	91	40.1	12.4	41.6	343.9	95.1	3.89	0.6	2.29	1.17	5.91	51.6	4.5	321.7	2.33	1.27	129.91	#NULL!	#NULL!	9.1	#NULL!	#NULL!	#NULL!	#NULL!	#NULL!	#NULL!	无	2	1	2	0	1.4	79.62	2.37	50.3	50.5	39.3	54.65
2	李保恒	1	55	6.25	8.7	有	7	101	178	31.88	133	84	39.82	3.1	7.4	15.9	80.4	5.49	1.77	3.51	1.25	6.25	75.9	5.79	397.12	2.34	1.49	97.69	14.24	3.95556	8.7	#NULL!	18.31	14.73	0.24	29.96	39.46	无	1	1	1	0	1.3	74.86	0.452	56.75	57.15	42.8	62.2
2	张志香	2	66	16.33	15	有	7	158	47.5	19.03	87	63	31.7	7.2	11.7	17.4	42.6	9	2.23	5.84	1.42	16.33	48.3	3.8	299.2	2.03	1.13	98.27	#NULL!	#NULL!	15	#NULL!	11.52	7.43	0.35	33.14	20.14	无	2	1	2	0	0.675	66.55	2.59	48.45	54.45	40.65	52.15
2	芦洪梅	2	32	8.29	12.1	有	7	165	68	24.98	123	82	38.66	19.9	21.3	21.6	63.1	5.6	5.73	3.21	0.94	8.29	45.9	2.68	389.8	2.25	1.17	126.89	2.07	0.76268	12.1	32.6	#NULL!	#NULL!	#NULL!	#NULL!	#NULL!	有	2	1	2	0	1.3	78.92	1.14	44.65	50.85	38.05	55.65
2	田立新	1	49	9.45	10.1	有	7	170	78	26.99	142	101	43.1	11.9	14.2	16.5	111.4	4.6	0.76	3.2	0.95	9.45	71.9	11.76	265.6	2.34	1.21	104.17	14.2	5.964	10.1	24.78	18.75	26.33	0.21	92.38	37.47	无	1	2	2	0	1.69	106.4	0.936	50.5	48.5	40	54.6
2	姚武华	1	56	9.13	8.7	有	8	#NULL!	75	24.49	135	96	43.1	28.5	17.6	22.1	93.4	4.77	1.99	3.33	0.85	9.13	65.5	4.9	247.7	2.28	1.15	103.06	7.35	2.98247	8.7	#NULL!	13.84	11.45	0.41	45.25	48.77	无	2	2	2	0	1.43	103.8	1.2	54.8	53.1	42.8	54.2
2	丁国造	1	67	10.5	10.2	无	8	170	80	27.68	143	77	46.3	21.3	18.3	30.6	111.2	5.14	1.69	3.73	0.99	10.5	83.3	6.5	315.9	2.35	1.05	83.37	14.29	6.66867	10.2	#NULL!	32.31	8.45	0.18	27.12	30.83	无	2	1	2	0	2.37	100.1	2.37	53.95	54.15	45.65	62.8
2	刘彦霞	2	34	11.81	8.84177	有	8	160	65	25.39	116	79	37.39	43.8	34.8	99.4	89.5	12.55	16.64	0.97	2.2	11.81	52.9	4.82	183.8	2.26	0.96	119.41	6.23	3.27006	8.8	#NULL!	13.32	5.68	#NULL!	17.4	22.84	无	1	1	1	0	0.827	63.3	1.78	56	56.7	47.05	58.6
2	耿本府	1	74	6.57	6.8	有	8	170	76	26.3	107	70	39.2	16.1	15.4	17.7	31.6	3.99	1.4	2.85	0.83	6.57	84.1	4.3	324	2.33	1.36	78.41	9.83	2.87036	6.8	#NULL!	11.46	10.24	0.22	32.14	31.37	无	2	2	2	0	1.24	86.57	1.34	53.8	54.7	42.4	52.85
2	李香瑞	2	65	11.59	11	有	8	165	62	22.77	141	66	40.7	13.5	14.5	17.1	77.2	7.68	2.43	5.25	1.06	11.59	46.2	3.2	148.9	2.32	1.08	100.42	2.88	1.48352	11	#NULL!	8.96	8.3	0.36	39.87	64.77	无	1	2	2	0	1.32	77.12	2.82	52.2	52.95	38.5	54.9
2	李进志	1	57	8.12	8.1	有	8	176	92	29.7	112	82	41.8	27.3	18.4	36.3	56.9	5.58	1.26	3.66	1.17	8.12	100.2	7.8	455.1	2.4	1.28	71.5	11.99	4.32706	8.1	#NULL!	#NULL!	#NULL!	#NULL!	#NULL!	#NULL!		2	1	2	0	1.38	103.9	1.51	46.35	48.75	40	57.05
2	李丰	1	48	13.65	9.9	有	8	160	69	26.95	140	86	42.2	20.6	26.9	28.8	64.5	6.5	1.87	1.13	4.42	13.65	77.2	4.7	330.7	2.39	1.18	101.9	#NULL!	#NULL!	9.9	#NULL!	13.66	9.88	0.11	24.39	22.81	有	1	1	2	0	1.76	92.84	2.32	46.95	48.1	45.25	46.4
2	刘宝玉	1	38	14.34	9.7	有	9	171	90	30.78	146	102	44.4	52	29.3	40.8	121.6	4.13	2.9	2.71	0.77	14.34	67.1	5.52	291.3	2.23	1.13	115.8	#NULL!	#NULL!	9.7	#NULL!	8.02	13.32	0.54	44.98	63.4	有	2	2	1	0	1.99	97.9	4.28	55.7	53.7	39	55.5
2	刘秀琴	2	69	7.46	10.8	有	9	158	55	22.03	140	67	40.5	21.9	21	13.4	96.1	3.56	1.05	2.31	1.15	7.46	72.5	5.5	321.4	2.29	1.38	73.24	#NULL!	#NULL!	10.8	37.42	19.37	18.68	0.43	41.31	51.67	有	2	2	2	0	1.56	96.81	1.78	54.65	48.65	44.5	58.7
2	严军	1	42	3.07	8.5	有	9	180	75	23.15	111	73	43.2	13.9	14.7	24.8	102.8	4.77	2.62	3.09	0.99	3.07	63.65	6.38	213.01	2.31	1.23	115.06	#NULL!	#NULL!	8.5	#NULL!	19.56	12.9	0.49	46.11	41.77	无	1	1	2	0	1.17	92.59	0.876	47.25	56.5	36.45	50.65
2	李同瑞	1	53	6.28	8.4	有	9	176	65	20.98	127	84	29.6	16.1	21.6	24.1	91.7	4.67	1.33	1.12	3.35	6.28	84.8	6.3	244.8	2.14	1.06	0	1.12	0.312604	8.4	20.76	15.31	14.39	0.33	52.06	30.9	有	2	1	2	0	1.38	81.38	2.53	46	51.5	38.5	50
2	王存生	1	62	8.15	9.7	有	9	178	55	17.36	104	59	36.7	23.9	25.5	13.1	102.3	4.38	1.06	1.17	3.14	8.15	53.3	6.4	234.9	2.26	1.04	107.51	1.69	0.612156	9.7	34.21	15.12	14.24	0.35	69.24	44.48	无	1	2	2	0	1.63	106.5	4.6	40.6	45.15	31.25	42.4
2	胡树军	1	73	7.41	7.6	有	10	170	73	25.26	124	73	31.5	87.6	65.5	70.3	92.5	3.22	0.78	0.67	2.17	7.41	212.8	12.4	488.5	2.14	0.96	25.7	#NULL!	#NULL!	7.6	#NULL!	14.38	26.86	0.66	69.83	39.89	无	2	1	2	0	1.38	95.09	1.02	51.1	51.75	44.55	57
2	贾彦芳	2	59	7.54	9.6	有	10	158	56	22.43	154	81	41.3	14	19.1	18.5	76.6	3.81	1.45	2.29	1.11	7.54	64.55	5.22	418.7	2.36	1.44	90.42	#NULL!	#NULL!	9.6	#NULL!	21.52	15.51	0.49	39.9	46.24	无	1	1	2	1	1.81	112.3	1.97	64.05	55.85	45.25	58.05
2	李立丹	2	79	7.61	6.7	有	10	155	57	23.73	138	74	43.9	17.9	25.2	27.8	65.7	9.18	1.8	6.37	1.37	7.61	80.2	6.2	526.9	2.39	1.21	60.39	10.11	3.41943	6.7	20.68	15.47	18.62	0.41	49.53	32.78	无	2	2	2	0	1.5	96.43	4.34	58.9	61.8	50.8	55.7
2	王彦蒲	2	64	7.16	7.6	有	10	164	91	33.83	135	88	38.7	40.4	24.9	40	98.8	5.85	1.23	3.98	1.51	7.16	61.6	6.6	255.1	2.22	1.51	92.01	13.3	4.23236	7.6	#NULL!	14.64	25.55	0.71	76.91	34.7	无	2	2	2	0	1.64	104.8	3.43	53.4	57.05	44.85	55.95
2	栗伟	1	56	6.95	7.3	有	10	175	76	24.82	137	83	39.3	15.8	14.7	63.5	74.9	5.58	1.71	1.05	4.08	6.95	101.6	6.7	379.2	2.34	1.18	70.84	8.78	2.71204	7.3	17.56	9.86	21.42	0.39	65.73	62.64	非增殖期	1	1	2	0	1.86	112.8	1.19	58.05	53.8	42.2	54.5
2	张明山	1	69	5.69	12.3	有	10	170	60	20.76	109	72	29.7	8.2	12.6	12.3	133.2	3.61	1.01	2.3	0.71	5.69	75.3	7	171	2.2	1.21	88.83	#NULL!	#NULL!	12.3	#NULL!	10.56	4.69	0.51	31.22	24.55	无	2	1	2	0	1.35	96.01	2.17	56.55	53.95	38.4	59.15
2	贾桂英	2	75	10.89	8.3	有	10	160	70	27.34	120	63	44.5	8.3	15.9	20.6	58.6	6.57	1.86	1.53	4.29	10.89	79.3	6.2	204.4	2.34	1.27	63.01	11.83	5.72572	8.3	26.82	22.8	7.67	0.27	19.12	39.47	非增殖期	2	1	2	0	1.3	98.52	3.1	50.5	47.5	39	54.9
2	姜兴起	1	68	6.26	7.2	有	10	170	90	31.14	155	71	38.1	25.3	20.7	29.3	60.6	4.7	1.76	3.56	0.8	6.26	93.5	7.2	262.7	2.22	1.14	71.95	12.17	3.38596	7.2	#NULL!	22.85	14.32	0.52	47.63	53	有	2	2	1	0	1.03	72.33	1.14	53.55	51.95	40.55	53.7
2	罗习书	2	49	9.22	12.8	有	10	160	75	29.3	148	100	38	23.5	41.5	36.2	86	4.53	6.49	2.62	0.97	9.22	73.4	10.1	399.9	2.32	1.66	83.04	2.18	#NULL!	12.8	#NULL!	16.33	9.95	#NULL!	#NULL!	31.89	有	1	1	2	0	1.53	102	2.14	54.75	46.35	44.15	61.2
2	卜玉祥	2	74	5.98	7.2	有	10	156	60	28.76	180	81	33	37.3	26.2	21.2	87.8	3.67	0.87	2.06	1.15	5.98	171.5	11.4	359.6	2.11	1.64	24.97	#NULL!	#NULL!	7.2	#NULL!	7.55	47.41	1.41	171	38.9	非增殖期	2	1	2	0	1.31	86.58	1.45	56.3	57.05	39.6	47.4
2	刘彩丽	2	66	9.46	9.5	有	10	163	67	25.22	131	75	38.6	15.1	13.7	19.3	82.8	4.25	0.93	2.77	1.07	9.46	68.2	3.6	198	2.3	1.2	80.51	8.21	3.45185	9.5	#NULL!	5.53	11.4	0.4	40.33	27.38	有	1	1	2	0	1.4	90.74	3.86	58.85	48.25	41.75	50.6
2	伊桐生	1	80	5.86	6.4	有	10	160	55	21.48	114	66	37.6	5.2	11.9	11.1	40.2	2.5	0.97	1.36	0.9	5.86	75.4	5.1	501.9	2.25	1	63.34	#NULL!	#NULL!	6.4	17.93	10.7	21.27	0.86	58.96	29.23	无	2	2	2	1	1.12	114	1.55	43.2	41.3	36.7	50.15
2	武成梅	2	57	11.49	10.4	有	10	158	75	30.04	173	96	32	8.9	12.5	11.6	60	4.06	0.79	2.72	0.75	11.49	70.3	3.6	133.8	2.23	1.31	82.66	3.31	1.69031	10.4	#NULL!	11.96	11.37	0.31	32.07	26.48	有	1	1	2	0	1.41	103.2	4.32	46.4	55.2	37	48.55
2	贾云改	2	66	7.91	8.9	有	10	158	58	23.23	123	76	40.7	9.4	13	11.8	93.6	4.32	1.14	2.86	1.02	7.91	179.5	14.1	338.4	2.46	1.21	25	6.81	2.39409	8.9	38.08	17.02	30.84	0.9	84.54	26.1	无	2	1	2	0	1.03	77.63	2.17	48	45.35	38.9	46.15
2	任德忠	1	55	8.07	12.6	有	10	167	60	21.51	153	89	39.2	13.1	19.8	23.4	69.6	4.4	0.97	2.92	0.99	8.07	67.18	5.97	293.84	2.33	1.35	102.72	#NULL!	#NULL!	12.6	#NULL!	12.06	11.25	0.33	39.13	27.09	有	2	1	2	1	1.62	102.2	2.05	49.35	52.5	#NULL!	42.8
2	徐承红	1	64	7.02	10.3	无	10	170	60	20.76	112	66	37.3	21.8	22.8	118.3	124.2	3.77	1.38	2.33	0.95	7.02	130.5	19.3	630.1	2.26	1.34	49.45	#NULL!	#NULL!	10.3	#NULL!	6.61	16.67	0.36	81.24	84.53	非增值期	2	1	2	2	1.32	82.62	1.98	42.25	46.15	35.6	#NULL!
2	董龙宝	1	57	4.61	6.5	有	11	181	79	24.11	126	77	39.8	15.6	16.4	12.1	100.7	3.33	0.53	2.31	0.86	4.61	58.9	4.3	271	2.17	1.33	106.92	#NULL!	#NULL!	6.5	#NULL!	13.7	26.88	0.95	108.3	69.54	无	2	2	2	0	1.83	106.1	0.806	53.05	53.15	40.25	55.9
2	李金需	2	60	7.03	10.7	有	11	156	65	26.71	127	65	43.1	18.5	19.9	30.5	95.8	6.28	0.98	3.86	1.54	7.03	579	5.6	254.6	2.36	1.29	96.57	5.26	1.64346	10.7	#NULL!	13.17	19.08	0.39	61.14	46.01	非增值期	1	1	2	0	1.32	74.06	3.53	44.55	48.15	43.15	47.2
2	卢新瑞	2	72	10.83	10.9	有	12	158	60	24.03	165	84	39.9	10	15	18.7	57.2	3.89	1.14	1.19	2.34	10.83	62.3	3.8	147.8	2.24	1.11	86.14	5.73	2.75804	10.9	#NULL!	15	16.13	0.41	42.07	41.32	非增殖期	2	1	2	1	1.42	88.04	2.47	52.2	50.4	44.2	54.9
2	张雪芬	2	63	8.31	8.2	有	12	164	75	27.89	131	81	44.8	18.9	22.3	17.1	69.3	7.5	1.19	5.79	1.36	8.31	95.3	6.7	391.2	2.49	1.56	54.92	6.8	2.51147	8.2	#NULL!	11.65	18.84	0.32	58.71	51.91	无	1	1	2	0	1.3	98.27	7.16	58.5	54.5	46.5	57.9
2	胡乃丽	2	55	6.69	9.1	有	12	169	74	25.91	136	80	40.1	13.2	15	14.9	68	4.45	1.37	2.82	0.88	6.69	43.8	5	444.2	2.26	1.37	109.67	8.45	2.51247	9.1	25.18	25.36	14.32	0.35	40.25	49.27	有	1	1	2	0	1.39	96.67	2.48	55.45	52.75	39.95	60.6
2	万方	2	35	8.15	9.7	有	12	165	55	20.2	124	82	37.3	9.4	18.7	48.7	46.7	6.43	11.22	2.88	0.25	8.15	53.1	2.8	262	2.04	1.08	118.43	9.81	3.5534	9.7	#NULL!	6.34	5.61	0.15	19.35	56.29	有	1	2	2	0	1.31	89.98	4.02	48.2	54.05	37.2	40.9
2	温文法	1	62	4.63	6.1	有	12	170	64	22.15	96	58	39.3	4.4	19.2	13.8	61.9	3.65	2.01	0.86	2.23	4.63	81.8	4.9	308.1	2.26	1.23	88.22	3.34	0.687298	6.1	#NULL!	24.4	14.23	0.65	40.6	32.25	无	2	2	2	1	1.39	102	2.49	48.45	45.7	36.6	40.5
2	陈三顺	1	77	5.52	7.4	有	13	165	71	26.08	140	70	41.4	17.1	24.9	20.2	65.6	4.58	1.43	1.35	2.66	5.52	67.2	4.6	207.3	2.49	1.27	87.98	#NULL!	#NULL!	7.4	#NULL!	12.13	18.03	0.61	49.78	41.82	无	2	2	2	1	1.72	99.1	3.3	54.5	49.7	43.2	56.8
2	李满红	1	67	8.75	8.5	有	13	173	80	26.73	131	83	40.8	13.7	14.3	24	78.7	3.98	2.7	2.51	0.88	8.75	71.88	5.64	295.01	2.19	1.17	91.82	3.9	1.51667	8.5	#NULL!	22.65	12.88	0.21	33.74	24.34	非增值性	2	1	2	0	1.54	86.67	2.84	52.35	51.5	41.45	43.4
2	冯志新	1	52	9.88	9.1	有	13	173	70	23.39	126	82	37.1	63.7	97.7	1193.3	26.8	5.16	1.32	1.17	3.7	9.88	55.4	2.9	270.8	2.2	0.77	113.55	3.96	1.73888	9.1	24.27	12.76	8.58	0.43	97.99	27.73	非增殖期	2	1	2	0	1.07	83.92	1.58	40.3	42.6	36.6	43.3
2	阎上游	1	59	6.11	7.4	有	14	178	107	33.77	129	74	41.2	15	17.7	32.7	66.2	4.03	8.02	0.83	2.2	6.11	#NULL!	3.9	92.68	2.47	1.38	1.5	#NULL!	#NULL!	7.4	#NULL!	20.36	9.23	0.11	27.89	22.49	无	1	1	1	1	1.5	92.68	1.5	59.05	55.15	46.35	58
2	闫向上	1	54	12.15	8.9	有	14	174	109	36	158	96	44.75	52.6	39.1	71.7	80.1	6.36	3.4	4.19	1.33	12.15	69.4	5.78	307.6	2.45	1.34	102.07	19.77	10.6758	8.9	24.5	20.14	9.91	0.18	32.05	20.61	无	1	2	1	0	1.16	68.1	1.91	56.2	54.75	46.05	61.95
2	陆凤英	2	68	7.01	10.6	有	15	162	81	30.86	129	69	38.3	12.1	14.1	18.2	60.2	5.2	3.25	0.88	3.58	7.01	61.3	5.5	283	2.28	1.35	89.59	11.7	3.6452	10.6	24.58	22.64	16.29	0.23	46.7	24.17	无	1	1	1	0	1.53	91.48	1.76	56	52.5	45	52.15
2	耿文胜	1	69	7.52	8.7	有	15	174	90	29.73	155	97	42	23.2	21.3	30.4	68.2	2.96	1.36	1.74	0.8	7.52	77.1	6.4	254	2.26	1.49	87.97	#NULL!	#NULL!	8.7	#NULL!	18.63	11.36	0.29	41.71	31.71	无	1	2	1	0	1.83	88.68	1.8	52.8	56.9	42.05	55.2
2	赵聪明	1	69	10.98	10.3	有	15	178	92	29.04	155	87	38.3	11.1	12.5	14.4	71.6	4.05	1.32	0.94	3.03	10.98	77.1	6.1	230.4	2.26	1.08	87.96	#NULL!	#NULL!	10.3	#NULL!	#NULL!	#NULL!	#NULL!	#NULL!	#NULL!	非增殖期	1	1	2	1	#NULL!	0	#NULL!	51.65	51.2	37.35	47.5
2	涂桂英	2	61	7.73	7.7	有	15	150	60	26.67	163	92	44.59	20.1	16.3	21.4	64.4	5.38	1.06	3.29	1.56	7.73	59.2	5.61	197.5	2.33	1.32	95.19	10.45	3.59016	7.7	22.68	14.38	10.37	0.22	39.59	51.33	无	1	2	2	0	1.38	93.89	3.47	65.4	55.5	47.4	55.7
2	倪广义	1	71	9.37	7.6	有	15	167	78	27.64	152	78	37.7	14.1	20.5	35.5	81.7	2.73	1.08	1.6	0.84	9.37	94.4	7.04	335.7	2.24	0.97	69.68	#NULL!	#NULL!	7.6	#NULL!	20.61	14.26	0.3	28.7	51	无	1	2	2	0	1.57	78.06	5.74	59.65	53.25	41.05	56.7
2	周年锁	1	61	7.87	7.5	有	15	174	82	27.08	130	71	38.54	16.8	17.4	36.9	69	4.55	1.13	2.94	0.8	7.87	75.3	5.17	230.3	2.31	1.37	93.97	#NULL!	#NULL!	7.5	#NULL!	25.36	7.55	0.22	41.31	23	有	1	1	2	0	1.41	102.2	1.25	52.4	51.45	38.4	49.15
2	刘占京	1	66	11.63	8.5	有	15	170	67	23.18	146	89	40.5	28.5	20.4	33	108	6.05	1.18	4.07	1	11.63	70.8	8.1	227	2.26	1.04	93.05	#NULL!	#NULL!	8.5	#NULL!	8.94	8.13	0.24	28.92	52.06	无	2	1	2	0	1.44	98.76	2.25	58.8	57.05	40.45	57.8
2	申胜芹	2	67	10.86	9.6	有	15	160	68	26.56	167	103	38.2	4.6	12.8	13.8	87.9	3.88	3.03	0.81	2.47	10.86	79.6	5.3	448.3	2.28	1.08	#NULL!	#NULL!	#NULL!	9.6	#NULL!	10.72	17.35	0.74	41.57	50.62	非增殖期	1	2	2	0	1.22	106.4	1.08	53.5	49	40	54.5
2	高梅庭	2	70	9.11	10.3	有	15	160	70	27.34	142	80	37.8	36.4	29.5	25.9	90.5	3.87	1.97	2.73	0.83	9.11	62.8	4.1	357.6	2.1	0.97	86.52	14.23	#NULL!	10.3	25.52	12.38	22.66	#NULL!	#NULL!	59.75	无	2	1	2	1	1.29	88.28	3.16	58.65	51.4	43.15	56.2
2	赵运其	1	79	8.19	8	有	15	175	85	27.76	135	78	39.1	19.9	11	28.2	69	4.52	1.52	3.11	0.69	8.19	103	7.3	293.1	2.29	1.37	58.44	#NULL!	#NULL!	8	#NULL!	20.13	11.57	0.22	43.73	34.04	无	1	2	2	0	1.3	99.97	1.85	49	53	44	51.05
2	马国才	1	78	5.97	7.9	有	15	#NULL!	0	#NULL!	146	74	37.7	19.4	19.1	13.3	87.9	2.62	0.71	1.69	0.78	5.97	112.5	9	298.6	2.24	1.01	53.61	4.48	1.18869	7.9	40.73	6.54	26.49	0.69	81.53	56.01	有	2	1	2	0	1.3	63.1	1.84	49	43	#NULL!	40.9
2	汤五群	2	74	9.91	10.3	无	16	153	48	20.5	128	80	38.3	10.9	15.1	18.9	60.8	4.44	0.87	0.15	2	9.91	51.3	4.81	256.2	2.41	1.12	91.1	#NULL!	#NULL!	10.3	#NULL!	13.91	8.43	0.29	30.3	67.27	有	2	1	2	1	0.816	42.94	4.91	53.15	50.9	46.2	53.75
2	高伟	1	38	7.37	7.5	有	16	170	80	27.68	120	83	45.3	20.1	19.3	41.9	85	5.28	1.37	3.27	1.26	7.37	74.9	5.9	350.8	2.38	1.07	110.68	7.09	2.32237	7.5	18.94	12.32	15.99	0.45	72.74	63.17	非增殖期	1	2	2	0	2	115.5	2.63	53.1	53.45	46.15	51.8
2	张文革	1	52	19.06	11.4	有	16	175	76	24.82	157	103	42.7	21.6	18.9	36.6	112.8	6.13	1.62	3.78	1.32	19.06	73.4	5.4	303.2	2.31	1	101.15	11.07	9.37752	11.4	#NULL!	11.67	8.71	0.34	27.22	56.02	非增值期	1	1	2	0	2.02	103.5	0.987	52.75	49.15	43.45	53.25
2	高生元	1	68	4.91	7.6	有	16	163	67	25.22	#NULL!	0	39.2	24.6	22	16.5	56.4	2.4	0.92	1.62	0.71	4.91	93.2	7.3	297.2	2.19	1.31	72.27	9.47	2.06656	7.6	43.67	16.96	14.73	0.55	31.24	35.42	无	1	2	2	1	1.5	100.5	1.81	54.5	50.35	40	55.25
2	袁朝辉	1	49	14.96	12.4	有	16	181	90	27.47	120	86	37.93	13.4	12	16.8	65.4	5.22	1.8	3.46	1.02	14.96	70.2	7.26	370.68	2.15	1.34	105.22	5.54	#NULL!	12.4	#NULL!	15.97	9.48	0.34	34.84	32.62	有	1	1	2	0	1.21	77.12	1.87	51.15	55.05	39.85	54.9
2	李双所	1	59	8.3	7.6	有	18	175	74	24.16	139	75	41.8	17.7	16.8	13.2	99	2.75	1.87	1.9	0.75	8.3	78.5	4.2	340.8	2.29	0.93	93.67	2.85	1.05133	7.6	#NULL!	#NULL!	#NULL!	#NULL!	#NULL!	#NULL!	增殖期	2	1	2	0	1.55	69.27	2.02	53	53.05	39.25	50.2
2	郝福珍	2	66	14.17	9.9	有	18	157	45	25.56	106	63	39.8	37.8	34.2	10	96.9	6.28	1.54	3.7	1.68	14.17	64.4	6.4	209.5	2.48	0.94	86.29	#NULL!	#NULL!	9.9	#NULL!	9.43	12.13	0.36	36.19	71.14	无	2	2	2	0	1.01	89.43	2.12	54.5	54.5	41	47.55
2	吴焕之	1	71	6.73	11	有	18	168	64	22.68	96	45	28.1	8.2	12.8	27.6	75.3	5.53	0.9	3.53	1.14	6.73	121.3	10.9	361.7	2.01	1.12	51.43	#NULL!	#NULL!	11	#NULL!	3.83	11.84	0.4	47.09	36.55	有	2	1	2	0	1.08	106.6	0.736	44.6	43	34.5	#NULL!
2	王淑敏	2	66	27.06	12	有	19	155	93	38.71	147	86	36.6	21.6	20	26.7	81.8	5.44	1.24	1.25	3.63	27.06	128	12.1	563.7	2.34	1.34	37.62	28.71	34.5286	12	40.11	15.28	12.1	0.33	28.92	53.43	无	2	1	1	1	1.37	92.62	1.86	57	56.5	46	52.4
2	顾成学	1	67	16.85	9.9	无	20	170	64	22.15	105	55	#NULL!	0	#NULL!		#NULL!	0	#NULL!	#NULL!	#NULL!	16.85	#NULL!	0	#NULL!	0	#NULL!	#NULL!	13.29	9.95273	9.9	#NULL!	30.16	6.34	0.11	16.8	28.43	有	2	1	2	0	1.09	85.92	1.96	47.2	46.65	38.2	52.15
2	常文德	1	74	6.71	7.2	有	20	178	78	24.62	170	74	34.1	17.9	18.6	24.7	99.2	4.16	0.56	2.78	0.89	6.71	129.6	13	541.8	2.26	1.22	46.5	5.43	1.61935	7.2	21.76	30.49	13.29	0.17	0.17	23.84	无	2	2	2	0	1.48	90.46	11.48	52.65	50.2	40.4	48.65
2	王振英	2	80	21.22	16	有	20	160	49	19.14	122	71	34.5	17.1	19.6	19.2	97.2	5.23	1.52	1.09	3.8	21.22	81.4	7.1	199	2.42	1.08	58.97	#NULL!	#NULL!	16	#NULL!	#NULL!	#NULL!	#NULL!	#NULL!	#NULL!	非增殖期	2	1	2	0	1.45	106.8	3.66	45.95	49.3	39.7	0
2	陈秀兰	2	69	14.64	8.2	有	20	162	67	25.53	160	78	40.4	24.9	35.8	42.9	88.7	5.48	5.61	0.69	3.07	14.64	123.6	9.1	296.1	2.47	1.33	38.43	28.73	18.6937	8.2	#NULL!	10.62	13.76	0.25	40.52	28.88	有	2	1	1	1	1.57	153	0.553	54.1	53.2	43.35	57.75
2	赵桂更	2	79	7.97	7.2	有	20	158	48	19.23	145	67	38.9	8.6	18.9	15.3	73	6.78	0.65	2.06	4.13	7.97	65	4.5	319.5	2.32	1.23	77.91	#NULL!	#NULL!	7.2	24.16	12.42	26.26	0.52	63.65	68.55	无	1	2	2	2	1.07	75.89	2.97	52.15	57.35	50.15	56.55
2	闫玉卓	2	58	4.59	7.4	有	20	158	67	26.84	140	83	43.2	68.9	61.2	27.6	51.4	5.51	1.24	3.51	1.66	4.59	66	6.1	337.3	2.29	1.45	88.71	#NULL!	#NULL!	7.4	#NULL!	28.24	17.77	0.54	50	32.03	无	2	1	2	0	1.87	79.53	3.02	64.65	64.7	51.55	63.5
2	刘仕忠	1	72	9.79	9	有	20	170	74	25.61	126	68	40.2	11	20.6	17	66.3	4.77	2.11	3.09	0.88	9.79	73.8	5.2	257.1	2.19	1.04	87.72	4.81	2.09288	9	27.13	19.8	14.7	0.36	46.64	40.37	有	2	1	2	0	0.931	66.35	4.62	52.6	52.65	37.65	48.25
2	魏国振	1	78	7.85	8.8	有	20	172	65	21.97	150	83	37.5	17.4	27.3	33.7	112.8	3.13	0.55	1.95	0.92	7.85	58.4	2.9	206.2	2.08	1.38	92.57	2.05	0.715222	8.8	31.17	19.23	15.79	0.51	62.44	36.75	无	2	2	2	1	1.43	113.4	1.43	50.75	51	46.15	50.85
2	李建民	1	55	3.39	8.2	有	20	168	70	24.8	138	83	38.2	11.8	139	15.5	66.4	4.65	1.3	3.31	0.95	3.39	93.7	7.63	327.7	2.24	1.34	78.63	#NULL!	#NULL!	8.2	23.16	12.64	12.26	0.65	36.08	103.1	未查	2	1	2	0	1.33	72.05	0.707	53.95	58.4	38.05	52.95
2	吴义文	1	62	7.87	6.1	有	20	180	75	23.15	166	91	44.7	12.6	19.9	14.3	105.6	3.5	2.53	2.16	0.92	7.87	85.9	6.4	310	2.24	0.93	83.16	#NULL!	#NULL!	6.1	#NULL!	12.03	14.57	0.3	33.14	71.77	有	2	1	2	0	1.69	79.52	2.5	59.25	53.9	43.5	50.8
2	刘国际	1	59	5.27	8.4	有	20	70	70	26.67	#NULL!	79	42.16	11.5	16	19.3	111.2	6.25	1.25	4.63	0.97	5.27	226	13.81	404	2.26	1.58	26.37	#NULL!	#NULL!	8.4	23.08	8.18	31.53	0.25	84.92	127.3	有	2	1	2	2	1.35	74.38	4.86	52.5	52	47	51.55
2	王金华	2	71	10.09	8.8	有	20	162	70	26.67	155	81	41.7	8.6	12.2	12.1	75.6	4.78	4.47	0.95	3.37	10.09	68.1	6.5	322.5	2.34	1.2	77.93	24.78	11.1125	8.8	24.42	12.34	18.04	0.46	37.29	32.03	无	1	1	2	0	1.39	74.95	3.16	50.5	48.95	40.3	58.75
2	沈志英	2	68	8.85	10.8	有	20	159	77	30.46	130	72	44.2	14.4	19.2	19.4	85.7	4.75	1.75	3.22	1.1	8.85	82.2	6.8	427.8	2.4	1.2	63.37	98.44	38.7197	10.8	32.14	14.97	11.52	0.16	33.57	35.12	有	1	1	2	1	1.39	92.99	8.17	52	51.95	40.05	51.6
2	张友生	1	73	5.23	10	有	20	168	62	21.97	118	65	41.8	70.2	36.9	53.2	95.4	4.26	1.4	2.82	1.12	5.23	71.2	4.4	321.7	2.31	1.37	88.38	#NULL!	#NULL!	10	#NULL!	17.8	7.87	0.3	21.45	35.67	无	2	1	2	0	1.31	82.03	1.95	48.55	53.4	35.65	44.35
2	付玉伶	2	55	4.33	11.6	有	20	170	70	24.22	98	63	37.39	33.6	21.1	18.5	97.7	4.68	1.92	3.14	0.97	4.33	70.2	4.79	284.33	2.25	1.68	84.02	4.06	0.781324	11.6	#NULL!	11.06	20.86	0.41	69.18	28.38	有	1	1	2	1	0.795	83.69	2.26	53	55	41.5	56.35
2	张殿宝	1	69	17.4	10.1	有	20	163	68	25.59	107	55	40.4	13.1	12.1	10.3	99.6	4.5	0.93	0.9	3.33	17.4	68.1	6.8	173.4	1.28	0.84	92.58	#NULL!	#NULL!	10.1	#NULL!	14.72	12.36	0.43	28.66	25.95	有	2	1	2	0	1.57	100.7	1.48	53.5	47.5	36.5	54.35
2	成保银	1	54	7	10	有	20	172	78	23.37	116	65	31.4	17.2	16.8	22.2	60	3.82	0.71	2.69	0.84	7	89	4.2	166	2.14	1.18	84.25	4.11	1.27867	10	#NULL!	16.64	7.41	0.19	27.4	12.31	有	2	1	2	0	1.39	99.63	1	53.5	55.5	35.5	50
2	孙素果	2	63	2.93	9.6	有	20	155	0	#NULL!	178	85	37.8	9.1	13.9	11.8	95.2	6.33	0.9	3.98	1.24	2.93	81.5	6	238.9	2.28	1.22	66.32	#NULL!	#NULL!	9.6	#NULL!	9.01	27.25	0.78	75.27	58.93	无	2	1	2	0	1.18	64.39	1.03	48.45	52.7	33.05	#NULL!
2	赵世亮	1	46	18.96	11.4	有	20	175	80	26.12	121	71	44.2	10.1	11.5	13.5	112.1	4.8	2.96	3.05	0.88	18.96	89.5	8.4	409.1	2.33	0.95	88.54	12.07	10.171	11.4	#NULL!	17.99	17.39	0.27	32.63	30.5	非增值期	1	1	2	0	1.32	106.3	1.15	46.5	48.5	42	53
2	盖冰卡	1	62	17.59	10.8	有	20	170	75	25.95	118	78	48.9	20.8	18	31.6	92.1	6.65	2.12	4.89	0.96	17.59	79.3	7.2	324.2	2.49	1.36	91.32	#NULL!	#NULL!	10.8	#NULL!	15.86	7.49	0.27	24.81	43.13	有	1	1	2	1	1.42	116.3	1.12	45.7	43.4	38.2	41
2	刘圣分	2	78	15.01	11.2	有	21	163	63	23.71	119	68	38.8	8	11.8	11.8	51.6	3.93	0.92	2.64	0.89	15.01	74.5	6.1	179.6	2.15	1.09	66.57	3.64	2.42828	11.2	40.17	13.72	6.67	0.24	24.45	47.7	有	2	1	2	0	0.964	92.16	0.936	52	54.5	40.25	49.25
2	陈振清	1	52	13.63	8.5	有	22	165	80	29.38	177	99	46.78	11.3	21	183.1	56.9	4.02	1.52	2.46	1.25	13.63	68	5.4	298.2	2.43	0.82	104.38	17.71	10.7283	8.5	24.92	28.06	6.38	0.07	17.66	19.92	无	1	1	1	1	1.57	109.2	1.37	49.4	49.1	36.7	52.15
2	李建蓬	1	49	12.26	9.3	有	22	172	95	32.11	150	83	42	8.7	21.5	32.2	85.4	4.81	1.36	0.98	3.4	12.26	82.2	8.1	318.7	2.28	0.93	96.08	5.59	3.04593	9.3	5.67	23.46	8.96	0.27	25.44	52.07	非增殖期	1	1	2	0	1.85	93.57	3.56	46.5	46.1	38.9	#NULL!
2	张兰芝	2	65	10.93	8.3	有	23	160	70	27.34	155	74	37.3	37.9	33.2	112.4	195.2	3.39	1.58	1.99	0.99	10.93	71.5	6.17	309.99	2.17	1.06	76.6	#NULL!	#NULL!	8.3	#NULL!	12.28	13.18	0.35	0.35	40	有	2	1	2	0	2.5	158.3	2.63	55.7	54.45	43.5	51.85
2	陆群山	1	75	10.09	8.6	有	23	#NULL!	80	25.25	166	86	40.1	14.8	13	52.1	53.4	2.37	1.26	1.43	0.65	10.09	82.8	4.5	357.5	2.21	1.29	79.34	60.77	#NULL!	8.6	21.56	33.41	13.71	#NULL!	#NULL!	36.34	无	2	1	2	1	1.36	75.96	1.77	53.45	52.3	36.1	51.55
2	杨志广	1	56	11.36	8.4	有	23	178	80	25.25	143	77	38.6	14.8	16.3	16.3	79.8	3.62	1.06	2.34	0.87	11.36	87.3	6.4	393.2	2.16	0.78	85.04	3.61	1.82265	8.4	#NULL!	15.36	10.99	0.18	37.34	24.74	非增值期	1	2	2	0	1.45	87.75	2.83	45.5	47.75	34.65	53.4
2	刘聚海	1	68	12.66	8.2	有	24	170	95	32.87	189	90	41.3	14.2	19.1	15.4	75.6	6.15	5.72	3.64	0.97	12.66	99.3	6.5	339.9	2.33	0.88	66.9	30.06	16.9138	8.2	#NULL!	22.24	8.73	0.11	20.21	37.1	无	1	1	1	1	1.44	94.38	1.48	52.8	53.2	44.15	49.8
2	孟献文	1	64	5.9	6.7	有	25	170	60	27.68	144	79	42.2	18.9	24.8	14.8	68.6	5.76	1.58	3.76	1.19	5.9	92.7	4.8	365.5	2.41	1.07	74.76	5.49	1.4396	6.7	#NULL!	13.85	15.48	0.42	40.75	57.07	无	1	1	2	0	1.7	84.86	2.53	53.25	58.9	48.4	54.8
2	张连海	1	54	10.41	7.6	有	25	176	80	25.83	121	70	41.43	26.7	22.1	32.3	82.8	4.11	1.69	2.79	0.74	10.41	73.1	6.57	369.26	2.27	1.13	99.91	#NULL!	#NULL!	7.6	#NULL!	16.39	18.68	0.36	44.69	40.79	无	1	1	2	0	1.34	74.72	1.84	44.5	51	38.5	#NULL!
2	袁占强	1	60	13.08	12.2	有	27	172	87	29.41	135	74	#NULL!	0	#NULL!		#NULL!	6.6	2.08	#NULL!	#NULL!	13.08	#NULL!	0	#NULL!	#NULL!	#NULL!	#NULL!	#NULL!	#NULL!	12.2	#NULL!	13.91	5.19	0.21	12.84	38.59	无	1	1	2	0	1.05	0	#NULL!	43.4	49.15	39.95	47.2
[truncated: 34 more columns]

## Sheet: 1组 
分组	姓名	性别	年龄2	新空腹血糖	新糖化	神经病变有无	病程2	身高	体重	BMI	收缩压	舒张压	白蛋白	谷丙丙氨酸	谷草天冬氨酸	r谷氨酰	碱性磷酸酶	总胆固醇	甘油三酯	低密度	高密度	旧FBG	肌酐	尿素氮	尿酸	血钙	血磷	肾小球滤过率	空腹胰岛素	HOMAIR	糖化血红蛋白_1	糖化白蛋白	维生素D3	骨钙素	B胶原特殊序列	总I型胶原氨基酸延长肽	甲状旁腺素	视网膜病变有无	有无二甲双胍	有无用胰岛素	有无GLP1	冠心病0无1有冠心病无心梗2有过心梗的	总T3	总T4	TSH	尺神经运动	正中神经运动	腓总神经运动	尺神经感觉
1	代国清	1	54	9.91	8.1	无	0.015	160	72	28.12	154	117	45.7	17.3	17.9	100.4	118.8	6.45	1.17	4.47	1.31	9.91	80	7.3	399.4	2.39	1.12	95.85	5.34	2.35197	8.1	#NULL!	20.57	10.68	0.16	25.38	46.42	无	1	2	2	0	2.47	127	1.53	59.1	59	52.15	50.95
1	司晓鹏	1	33	11.3	9.6	无	0.02	170	88	30.45	102	75	#NULL!	#NULL!	#NULL!		#NULL!	5.88	2.09	#NULL!	#NULL!	11.3	#NULL!	#NULL!	#NULL!	#NULL!	#NULL!	#NULL!	#NULL!	#NULL!	9.6	25.13	12.53	15.53	0.55	70.45	49.49	无	1	1	1	0	1.8	85.38	1.39	52.5	57.5	47.5	62.5
1	王艳茏	2	46	6.44	6.9	无	0.03	166	50	18.14	106	74	35.5	16.7	17.4	31.1	62.7	3.99	0.52	1.31	2.47	6.44	62.7	4.2	214.6	2.17	1.55	102.61	#NULL!	#NULL!	6.9	#NULL!	#NULL!	#NULL!	#NULL!	#NULL!	#NULL!	无	2	1	2	0	1.02	104.2	1.5	65.3	63.05	48.4	79.45
1	杨华勤	2	52	7.81	7.8	无	0.04	173	86	28.73	133	97	43.2	74.9	55	30.1	110.9	4.56	1.94	0.98	3.08	7.81	56.1	6.1	223.2	2.51	1.22	103.22	24.63	8.54935	7.8	17.3	18.67	16.55	0.64	69.96	67.84	无	1	2	2	0	1.87	115.1	0.989	58.1	56.7	48.7	57.1
1	张玉苗	1	33	10.46	8.8	无	0.04	178	68	21.46	123	101	47.3	22.1	18	24.5	81.5	5.13	2.52	3.3	1.07	10.46	74	4.07	303.1	2.33	1.11	115.21	6.01	2.79398	8.8	#NULL!	24.03	12.79	0.19	35.06	30.95	无	1	1	2	0	1.51	94.55	2.76	62	58.5	46.5	66.9
1	刘伟	1	33	9.89	8.7	无	0.07	176	97	31.31	149	96	44.8	29.3	21.9	115.9	121.4	4.33	3.66	2.89	0.86	9.89	76.3	5.3	326.3	2.33	1.38	113.8	#NULL!	#NULL!	8.7	#NULL!	#NULL!	#NULL!	#NULL!	#NULL!	#NULL!	无	1	1	1	0	1.92	96.55	2.15	54.1	53.35	48.3	68.4
1	齐宝凤	2	55	17.72	13.6	无	0.1	160	60	23.44	135	91	#NULL!	#NULL!	#NULL!		133.7	6.31	5.28	#NULL!	#NULL!	17.72	#NULL!	#NULL!	#NULL!	#NULL!	#NULL!	#NULL!	#NULL!	#NULL!	13.6	#NULL!	#NULL!	#NULL!	#NULL!	#NULL!	#NULL!	无	1	1	2	0	1.01	84.92	2.01	65	58.4	50.15	58.35
1	武艳涛	1	37	8.1	10.2	无	0.1	169	64	22.4	121	72	38	27	39.8	24.9	77	3.53	1.38	2.17	0.88	8.1	68.9	3.5	349.9	2.28	1.53	115.36	2.52	0.9072	10.2	#NULL!	12.33	17.1	0.89	108.3	37.24	无	2	1	2	0	1.39	109.1	12.69	55.65	59.65	44.55	51.65
1	商段果	2	62	3.96	7.5	无	0.1	163	65	24.46	148	75	40.8	54.3	58.7	69	110.4	3.7	1.79	1.11	2.17	3.96	65	4.1	262.5	2.24	1.4	87.79	5.41	0.95216	7.5	#NULL!	35.5	20.01	0.7	55.59	45.98	无	1	2	2	0	2.41	161.1	6.07	63	58.5	47	60.1
1	彭海云	1	52	8.24	10.6	无	0.1	172	80	27	145	97	41	9.6	20.4	21.6	94.1	4.65	1.56	0.76	3.26	8.24	80.4	8.4	314.3	2.18	1.19	96.63	8.43	3.08725	10.6	27.45	18.07	11.94	0.37	41.27	40.45	无	1	2	2	0	1.7	94.55	0.837	58.5	57	44	61.75
1	张二菊	2	50	8.5	8.1	无	0.2	162	60	22.86	155	81	43.8	16.3	19.5	30.8	70.4	4.79	1.49	3.21	1.06	8.5	58.43	6.57	257.4	2.35	1.14	92.31	#NULL!	#NULL!	8.1	#NULL!	22.83	12.53	0.56	51.38	56.28	无	1	1	2	2	1.33	71.16	4.29	62	63	48.5	56
1	张云山	1	56	9.06389	5.6	无	0.2	168	62	21.97	94	73	#NULL!	#NULL!	#NULL!		#NULL!	#NULL!	#NULL!	#NULL!	#NULL!	9.06	#NULL!	#NULL!	#NULL!	#NULL!	#NULL!	#NULL!	#NULL!	#NULL!	5.6	#NULL!	#NULL!	#NULL!	#NULL!	#NULL!	#NULL!	无	1	2	2	0	#NULL!	#NULL!	#NULL!	55.8	54.55	48.75	56.1
1	赵森虎	1	46	6.1	13.7	有	0.2	170	64	22.15	123	70	39.92	18.3	15.5	13.5	99.2	4.61	0.61	3.07	1.01	6.1	62.5	3.9	254.82	2.3	1.32	112.72	4.47	1.21187	13.7	#NULL!	10.43	15.39	0.92	36.73	45.71	无	1	1	2	0	1.23	91.05	1.85	57	60	51	56.95
1	郝芳宾	2	40	20.12	12.9	2月	0.2	53	20.7	20.7	126	84	41.7	25.1	24.2	21.9	90.2	5.81	2.09	4.11	0.83	20.12	61.3	5	170	2.34	0.99	109.06	3.92	3.5054	12.9	0	13.89	9.04	0.23	26.07	33	有	2	1	2	0	1.31	87.82	1.6	54.65	54.45	43.9	53.25
1	臧少卫	2	49	9.06389	11.12	无	0.3	162	64	24.39	127	86	#NULL!	#NULL!	#NULL!		#NULL!	#NULL!	#NULL!	#NULL!	#NULL!	9.06	#NULL!	#NULL!	#NULL!	#NULL!	#NULL!	#NULL!	5.61	#NULL!	11.12	#NULL!	16.54	10.84	0.4	42.42	31.53	无	1	2	2	0	1.75	115.8	1.09	58.5	62	47.5	59.2
1	李明	1	62	4.84	9.1	有	0.4	183	87	25.98	143	82	38	21.5	19.5	14.2	85.8	2.09	1.1	1.28	0.53	4.84	69.1	3.8	249.7	2.09	1.68	96.66	#NULL!	#NULL!	9.1	#NULL!	18.59	22.13	#NULL!	#NULL!	43.57	无	1	1	2	0	1.79	113.1	0.201	67.25	62.3	#NULL!	65.9
1	牛景雁	2	38	4.95	6.8	无	0.5	165	67	24.61	108	83	40.6	10.2	12.9	8.7	38.9	4.2	0.8	2.69	0.97	4.95	55.6	5.6	280.1	2.25	1.35	114.22	6.66	1.4652	6.8	#NULL!	23.23	14.48	0.41	35.25	39.56	无	1	1	2	0	1.28	69.48	3.71	54.1	55.55	48.9	58
1	徐运华	2	64	5.69	8.84177	有	0.5	160	69	26.95	154	76	44.1	14.2	17.8	19	104.6	2.72	1.04	1.56	0.81	5.69	58	6	212.7	2.35	1.14	93.85	#NULL!	#NULL!	8.85	#NULL!	#NULL!	#NULL!	#NULL!	#NULL!	#NULL!	有	1	2	2	0	1.47	97.16	6.03	56.75	52.45	45	52
1	边江	1	44	8.2	5.2	无	0.6	172	75	25.35	107	71	39.5	45	21.4	34.7	70.1	5.4	2.1	3.56	1.16	8.2	77.41	5.59	292.01	2.28	1.38	104.69	9.77	3.56062	5.2	#NULL!	14.82	13.25	0.47	41.08	33.18	无	2	2	2	0	1.57	56.97	2.47	57.25	56.75	45.25	57.9
1	裴慈恩	2	37	6.72	7.5	无	0.6	158	59	23.63	114	85	48.9	15.8	18	23.4	71.6	5.79	1.85	3.94	1.07	6.72	70.3	4.2	343.4	2.43	1.12	95.23	6.46	1.92939	7.5	#NULL!	#NULL!	#NULL!	#NULL!	#NULL!	#NULL!	无	2	2	2	0	1.34	117.5	1.53	58.25	62.3	48.7	57.6
1	齐恒建	1	56	9.06389	6.4	无	0.6	168	87	32.74	136	101	46.1	12.6	14.1	21.4	94.7	5.35	2.65	3.9	0.78	9.06	89.4	7.4	408	#NULL!	#NULL!	62.31	11.2	#NULL!	6.4	#NULL!	11.53	8.19	0.45	42.97	62.75	无	2	2	2	0	1.55	112.3	1.64	63.5	58	48	62.2
1	王凤霞	2	55	9.06389	14.2	有	0.6	163	70.5	26.53	154	101	#NULL!	#NULL!	#NULL!		#NULL!	#NULL!	#NULL!	#NULL!	#NULL!	9.06	#NULL!	#NULL!	#NULL!	#NULL!	#NULL!	#NULL!	1.92	#NULL!	14.2	#NULL!	14.22	13.59	0.51	53.83	39.35	无	1	1	2	0	1.46	81.51	2.38	55.45	53.3	46.6	60.65
1	赵风岐	1	62	7.82	5.2	有	0.6	170	62	21.45	120	59	37.7	23	18.5	13.2	64.6	7.78	0.9	1.41	5.45	7.82	64.1	4.5	165.6	2.12	0.91	99.69	2	0.695111	5.2	51.31	#NULL!	#NULL!	#NULL!	#NULL!	#NULL!	无	1	1	2	0	1.1	66.54	9.24	52.95	47.05	43.2	52.5
1	朱卫东	1	51	5.11	5.6	有	0.6	170	90	31.34	128	75	41.1	20.3	19.7	29.5	68.4	5.28	1.76	1.17	3.54	5.11	66.4	5.4	504.5	2.31	1.44	106.15	11.84	2.689	5.6	13.86	28.9	20.14	0.38	52.58	45.13	无	1	2	2	1	1.52	80.17	2.57	54.65	55.9	48.05	65.5
1	倪立新	1	51	7.36	7.9	无	1	172	77	26.03	124	77	43.4	18.8	15.1	40.8	73.5	4.88	5.14	2.85	0.81	7.36	82.1	6	339.4	2.31	1.2	94.88	#NULL!	#NULL!	7.9	#NULL!	9.31	12.39	0.28	28.02	38.61	无	1	2	2	0	1.47	75.14	1.33	59.85	59.1	44.25	64.05
1	倪卫江	1	43	6.57	8.1	无	1	170	94	32.53	146	90	43.9	9.5	12	25.6	81.6	6.32	2.3	4.44	0.8	6.57	83.1	6.4	459.6	2.29	1.5	98.91	6.17	1.80164	8.1	#NULL!	#NULL!	#NULL!	#NULL!	#NULL!	#NULL!	无	1	2	2	0	1.39	75.66	2.55	54.2	53.5	47	65.1
1	王彦民	1	56	6.14	5.8	无	1	170	55	19.03	115	71	44.8	23.3	23.8	46.8	110.2	4.09	0.69	2.15	1.58	6.14	82.6	5.01	277.7	2.4	1.13	90.99	2.98	0.813209	5.8	18.98	28.01	9.7	0.14	50.05	19.54	无	2	2	2	0	1.73	109.7	2.59	59.55	59.05	46.25	61.25
1	罗士秀	2	71	4.68	6.7	无	1	155	70	29.14	137	82	36.5	21.1	22.1	22.6	73.9	7.22	2	4.72	1.44	4.68	64	4.1	256.8	2.23	1.13	84.05	#NULL!	#NULL!	6.7	#NULL!	8.64	25.53	0.6	69.04	62.45	无	2	1	2	0	1.72	89.49	1.01	52.15	54.9	45	64.55
1	甄献花	2	50	11.87	13	有	1	160	64	25	114	86	38.9	35.6	24.7	71	93	6.76	2.51	4.57	1.2	11.87	49.34	4.07	277.97	2.47	1.73	109.19	#NULL!	#NULL!	13	#NULL!	14.15	9.7	0.35	40.72	19.13	无	1	1	2	0	1.29	106.8	1.31	53.35	54.7	45	61.1
1	耿敖孩	1	55	7.11	11.8	有	1	175	70	22.86	149	93	43.4	33.4	25	50.8	138.9	5.36	1.12	3.43	1.03	7.11	71.4	4.8	245.8	2.35	1.07	100.18	#NULL!	#NULL!	11.8	#NULL!	15.54	15.33	0.7	71.78	33.96	无	2	1	2	0	1.92	127.5	2.11	65.5	62.5	45.5	53.55
1	常宏	1	39	5.25	5.8	有	1	175	70	22.86	107	72	40.2	12.5	13	12.3	49	4.26	1.45	0.91	3.17	5.25	69.8	6	265.8	2.22	1.45	113.17	4.31	1.00567	5.8	14.37	#NULL!	#NULL!	#NULL!	#NULL!	#NULL!	无	1	2	2	0	1.5	81.73	4.75	54.9	55.75	43.4	52.45
1	赫志花	2	68	9.55	9.1	无	2	155	72	29.97	123	88	40.02	30.9	23	24.8	87.2	6.57	1.71	4.27	1.58	9.55	82.1	3.84	188.15	2.26	1.16	63.46	6.86	2.91169	9.1	#NULL!	25.91	18.23	0.62	44.25	24.14	无	1	2	2	1	0.898	83.55	2.78	52.65	54.25	48.3	59.35
1	王洋	1	27	8.17	10.9	无	2	183	90	26.87	139	93	40.6	12.8	12.3	29.5	40.9	3.15	0.76	2.09	0.81	8.17	63.43	5.1	274.83	2.35	1.38	128.03	9.2	3.34062	10.9	#NULL!	13.45	13.15	0.46	25.82	37.54	无	1	2	2	0	1.19	84.81	1.35	61	60.5	49.5	59
1	张守龙	1	42	8.55	8	无	2	175	95	31.02	136	90	44.7	36.4	29	29.3	99.3	5.34	3.26	3.33	0.99	8.55	66.2	7.6	452.7	2.28	1.41	113.22	22.84	8.6792	8	#NULL!	22.97	16.26	0.5	74.7	45.5	无	1	2	2	0	1.48	74.5	2.63	53.55	55.5	44.35	60.45
1	张兆	1	44	5.09	6.2	无	2	173	70	23.39	137	97	42.3	18.3	20.7	82.1	75.7	5.03	3.47	2.86	1.09	5.09	88.9	4.8	510.4	2.31	1.18	90.52	#NULL!	#NULL!	6.2	#NULL!	14.68	17.19	0.68	49.16	60.26	无	1	2	2	0	1.5	82.78	1.59	63.35	61.4	50.7	65.85
1	邵晨	1	40	12.86	9.4	无	2	170	69	23.88	129	69	42.6	19	17	24	45.4	4.09	2.43	0.97	2.77	12.86	62.8	5.3	283	2.47	1.16	117.34	8.61	4.92109	9.4	24.02	17.96	11.68	0.24	19.38	34.4	非增殖期	1	2	1	0	1.54	118.9	0.963	52.45	53.1	43.95	59.35
1	王建霞	2	50	5.35	5.7	无	2	162	55	20.96	103	61	40.8	12.9	16	13.5	84.2	5.87	4.3	1.02	3.67	5.35	54.9	5.4	523.42	2.43	1.12	105.42	9.15	2.17567	5.7	15.07	19.37	36.19	0.73	85.03	47.57	无	2	2	2	0	1.12	66.67	3.27	58.65	57.15	49.55	62.45
1	刘克敏	1	42	8.66	7.7	无	2	186	90	26.01	131	87	45.9	31.5	24.6	71.1	55.2	5.77	3.11	1.17	3.77	8.66	86.5	7.2	504.4	2.39	0.89	94.89	18.15	6.98573	7.7	22.31	21.19	9.87	0.18	17.55	49.13	无	1	2	2	0	1.47	93.45	2.26	60.9	60.65	48.9	56.5
1	刘志宏	1	49	6.49	6.5	无	2	178	87	27.46	177	98	43.9	25.5	21.8	112	94.4	5.07	2.29	1.17	3.4	6.49	65.7	6.4	361.9	2.34	0.88	108.12	14.84	4.28052	6.5	16.28	16.31	12.09	0.48	32.11	61.42	无	1	2	2	0	1.4	85.89	1.38	63	60.65	46.75	59.6
1	吴力强	1	35	10.1	8.4	无	2	170	66	22.84	125	75	44.8	35.9	31.7	50.1	108.1	9.08	16.25	3.68	0.63	10.1	79.1	5.2	306.3	2.28	1.11	110.53	7.29	3.2724	8.4	#NULL!	15.34	13.42	0.85	56.42	26.49	无	2	1	2	0	1.34	91	2.67	67.25	63.1	45	65.4
1	张险峰	1	48	7.76	7	有	2	180	75	23.15	121	86	44.5	15.7	18.8	25.6	61.2	5.81	1.77	3.85	1.35	7.76	70.1	6.3	337	2.37	1.15	106.05	11.45	3.94898	7	20.95	16.65	14.56	0.41	29.16	46.47	无	1	2	2	0	1.53	94.92	0.598	55.25	54.35	46.4	60.45
1	赵国栋	1	64	4.44	6.2	有	2	160	72	28.12	108	80	43	23.6	22.4	20.1	62.9	2.43	1.42	0.67	1.5	4.44	95.7	7.2	347.7	2.2	1.18	71.95	10.99	2.16869	6.2	17.13	15.11	12.84	0.49	55.11	59.76	无	2	2	2	0	1.72	86.7	2.96	55.6	52.95	47.25	58.15
1	张少楠	2	26	7.42	9.14	有	2	158	75	30.04	123	91	41.9	51.7	40.3	30.6	72.6	3.44	0.81	1.87	1.22	7.42	51.7	4.6	263.6	2.34	1.33	127.27	40.49	13.3527	9.14	#NULL!	10.68	16.46	0.74	66.69	48.07	无	1	2	1	0	2.06	101.8	2.92	59.8	58.35	52.45	67.1
1	杜亮波	1	41	14.95	8.6	有	2	170	85	29.41	135	97	45.1	12.1	12.7	23	82.3	4.13	4.39	2.86	0.7	14.95	82.7	4.9	498	2.37	1	100.85	19.86	13.1959	8.6	#NULL!	15.9	14.96	0.29	39.07	45.66	无	1	1	1	0	1.6	99.48	3.86	53.7	54.4	43.55	53.7
1	曹彦芳	2	63	5.63	7.5	2年	2	63	16.91	16.91	170	93	36.5	9.6	14.5	12.1	92.7	5.08	1.28	3.12	1.2	5.63	50.6	3.7	242.8	2.2	1.1	98.84	7.09	1.7741	7.5	17.92	16.95	11.59	0.4	42.35	50.17	无	1	2	2	0	1.21	76.4	0.8	59.9	54.05	52.9	62.95
1	王延民	1	58	7.22	8	无	3	174	88	29.07	154	92	41.72	35.9	42.3	60	82.8	4.32	3.45	2.5	1.05	7.22	67.9	5.36	354.56	2.26	1.46	100.13	#NULL!	#NULL!	8	#NULL!	19.48	10	0.3	36.6	43.18	无	1	2	2	1	1.42	77.96	1.07	50.85	59	44.8	57.15
1	烟硕	1	31	7.04	8.84177	无	3	180	101	31.17	170	113	43.5	32.9	21.5	130.3	62.1	4.82	3.8	3.3	0.74	7.04	76.7	4.4	358.2	2.25	1.4	115.11	#NULL!	#NULL!	8.8	#NULL!	9.56	14.49	0.51	33.33	49.28	非增殖期	1	1	1	0	#NULL!	#NULL!	#NULL!	54.1	54.15	46.2	63.15
1	朱风科	1	53	8.23	10.4	无	3	172	82	27.72	119	82	38.7	87.9	49.6	76.2	69.4	3.7	1.24	0.75	2.38	8.23	81.7	5.1	270.6	2.26	1.54	94.11	#NULL!	#NULL!	10.4	#NULL!	11.87	11.92	0.27	34.73	21.16	无	1	1	2	1	1.25	94.42	2.72	55.9	55.35	51.05	58.35
1	王彩芬	2	69	9.33	8.5	无	3	168	70	26.35	159	85	41.9	22.1	20.1	32.6	124.3	3.55	1.26	1.02	2.24	9.33	55.7	4.4	182.6	2.32	1.23	91.81	10.03	4.15911	8.5	24.61	22.82	25.57	0.94	69.16	49.14	无	1	1	2	0	1.36	87.19	2.17	55.5	56	55.5	55.75
1	朱会彬	1	55	7.61	6.6	无	3	#NULL!	#NULL!	#NULL!	128	78	39	16.6	21	44.7	68	7.27	3.96	4.94	1.13	7.61	88.2	5.3	322.6	2.14	1.06	84.6	4.67	1.5795	6.6	#NULL!	11.63	9.64	0.41	25.93	89.4	无	1	2	2	？	#NULL!	10.18	57.32	58.5	62.5	47	56.7
1	马京学	1	43	8.51	8.6	无	3	170	93	29.41	133	102	44	22	14.2	39.2	59.4	4.8	2	3.03	0.95	8.51	74.9	6.75	479.5	2.44	1.4	106.89	#NULL!	#NULL!	8.6	17.94	15.83	9.41	0.47	34.71	48.44	无	1	2	1	0	1.95	100.9	4.21	56.85	56.55	51.7	60.3
1	王敏	1	79	7.64	6.8	有	3	170	60	20.76	130	66	39.3	18.8	22.1	13.6	56.6	5.25	0.61	3.07	1.42	7.64	65.4	3.7	203.6	2.26	0.96	87.74	#NULL!	#NULL!	6.8	#NULL!	11.46	15.62	0.42	36.08	53.18	无	2	2	2	0	1.14	67.11	1.3	55	55	45	54.3
1	祖利锋	1	37	17.27	13.3	有	3	173	63	21.05	104	78	44.4	16.7	14.1	16.6	117.4	6.4	0.73	4.25	1.29	17.27	69.2	4.4	208.4	2.45	1.39	115.15	3.28	2.51758	13.3	#NULL!	23.91	15.41	0.58	51.22	48.43	无	1	1	2	0	1.66	126.7	0.934	55.5	58	46.5	59.65
1	杜文谦	1	51	5.43	5.5	有	3	172	60	20.28	122	77	41.5	10.2	16.4	20.8	67.3	4.4	0.65	1.35	2.55	5.43	80.9	3.5	328.7	2.37	0.87	96.63	7	1.68933	5.5	#NULL!	22.29	15.39	0.95	33.05	70.4	无	2	1	2	0	1.33	83.25	2.6	62	61.5	48	63.15
1	崔贺来	1	70	6.49	7.3	有	3	175	78	25.47	123	62	39.8	19.8	20.5	22.2	39.9	3.48	0.86	1.22	1.98	6.49	84.9	5.2	395.6	2.3	1.23	79.73	9.1	2.62484	7.3	22.19	7.05	12.22	0.15	26.51	53.76	无	2	2	2	2	1.59	76.46	3.89	55.5	56.5	46.5	52.1
1	刘涵	2	44	10.45	8.7	有	3	166	70	25.4	126	80	37.6	22.8	18.4	24.7	53.8	4.95	2.25	3.28	0.88	10.45	57.1	3.9	154.2	2.27	1.13	108.56	#NULL!	#NULL!	8.7	25.92	13.88	10.85	0.35	46.93	33.7	无	1	2	1	0	1.44	81.76	1.35	52	52.75	45.25	55.5
1	张彦琴	1	62	7.45	7.1	有	3	171	76	25.99	141	71	44.2	17	17.6	22.7	134.3	5.17	1.01	3.21	1.35	7.45	64	7.77	242.3	2.37	1.09	89.42	10.57	3.49984	7.1	16.66	19.61	22.66	0.54	51.67	40.52	有	1	2	2	0	1.57	72.56	0.217	62.1	58.95	48.9	65.25
1	黄雪南	2	47	5.39	6.6	无	4	162	60	22.86	149	94	40.28	31.3	18.7	17.8	68.9	3.1	1.54	2.01	0.84	5.39	56.9	3.73	273.25	2.19	1.22	106.41	#NULL!	#NULL!	6.6	#NULL!	34.91	9.79	0.17	24.52	35.91	无	1	1	2	0	1.54	103.2	0.685	52.7	64.35	55	54.9
1	李世亮	1	63	7.28	8.1	无	4	170	75	25.95	118	71	42.9	13.7	20.8	14.9	56.9	6.2	0.82	3.81	1.63	7.28	72.5	6	246.5	2.27	0.94	94.11	#NULL!	#NULL!	8.1	#NULL!	#NULL!	#NULL!	#NULL!	#NULL!	#NULL!	无	2	1	2	0	1.63	102	1.01	55.7	58.4	43.9	58
1	兰晓辉	2	41	3.63	5.6	无	4	158	74	29.64	116	83	39.9	14.6	17.5	19	75.2	4.05	1.68	2.37	1.32	3.63	69.6	5.7	223.2	2.34	1.42	93.72	36.64	5.91125	5.6	14.09	13.61	17.17	0.45	55.98	44.85	无	1	2	1	0	1.75	94.81	1.2	59.5	61.4	51.9	63.85
1	苗龙兴	1	61	4.79	6.4	无	4	180	94	29.01	137	88	36.9	32.6	22.8	42.6	68.5	4.67	1.27	2.96	1.05	4.79	79.2	5	401.6	2.21	1.22	92.03	13.53	2.88039	6.4	#NULL!	17.58	16.66	0.33	38.07	36.87	无	2	2	2	0	1.48	109.9	0.807	53.7	53.85	44.55	59.2
1	王占久	1	59	6.32	6.5	无	4	175	80	26.12	146	89	38.9	13.8	15.7	35.9	60	3.97	1.04	2.56	0.95	6.32	134.6	9.6	333.6	2.16	1.24	49.32	7.33	#NULL!	6.5	19.13	23.86	14.35	0.5	53.31	50.2	无	2	2	2		1.41	71.78	0.786	55.2	58.75	45.8	59.4
1	陈晓宁	2	45	9.07	8	无	4	161	62	23.92	119	71	42.23	9	11.2	15.1	86.4	5.05	1.15	3.25	1.14	9.07	60.8	4.47	224.6	2.4	1.25	105.59	10.3	4.15204	8	#NULL!	12.18	12.04	0.49	32.08	39.94	无	1	2	2	0	1.54	88.51	4.92	54.95	58.35	47.25	65.45
1	王健	1	55	7.9	8.3	有	4	172	80	27.04	146	94	46.31	24.5	25.7	36	34.1	6.18	1.9	4.2	1.26	7.9	81.5	5.4	316.8	2.36	1.02	93.08	#NULL!	#NULL!	8.3	#NULL!	24.74	11.2	0.03	31.6	58.42	有 非增值性	1	2	2	0	1.9	107.3	3.46	54	57.2	45.15	54.7
1	田虹	2	58	7.68	6.9	无	5	162	52	19.81	125	88	44.9	16.8	14.9	18.1	83.8	6.79	1.62	4.63	1.32	7.68	47.6	4.4	254.2	2.28	1.35	104.45	#NULL!	#NULL!	6.9	#NULL!	25.03	18.71	0.49	49.35	38.98	无	2	2	2	0	0.958	60.13	1.93	59.75	58.25	51.85	54.95
1	张春芳	2	60	6.44	6.6	无	5	160	52	20.31	117	80	42.1	27.2	23	19.6	63.7	4.33	0.8	2.9	0.91	6.44	70.6	4	262.1	2.24	1.17	80.57	#NULL!	#NULL!	6.6	#NULL!	16.31	15.9	0.51	64.4	49.53	无	2	2	2	0	1.2	98.08	1.87	57.05	60.3	48.4	64.6
1	宋双印	1	47	9.48	8.4	无	5	160	70	27.34	112	88	43.6	12.5	14.4	16	99.9	3.9	0.99	2.52	1.05	9.48	77.5	3.9	191.6	2.35	0.99	102.46	6.29	2.65019	8.4	24.73	14.97	15.96	0.48	46.8	54.62	无	1	2	2	0	1.49	80.87	2.49	68.5	58.5	50	61.05
1	赵俊喜	2	61	8.2	12.2	无	5	160	55	21.48	144	80	38.5	10.8	15.4	15.6	95.3	4.98	1.45	2.99	1.24	8.2	53.5	5.7	276.3	2.25	1.39	98.42	0.992	0.361529	12.2	#NULL!	11.95	13.52	0.36	38.96	27.25	有	2	1	2	0	1.2	100.6	0.776	57.9	54.55	48.7	47.3
1	韩淑珍	2	69	7.31	7.5	无	5	176	80	26.91	142	74	35.6	23.1	20.1	21.6	73.4	3.42	0.96	1.27	1.84	7.31	58.4	5.8	365.8	2.13	1.35	90.4	8.35	2.71282	7.5	#NULL!	19.81	18.78	0.6	64.71	51.39	无	1	2	2	2	1.16	63.27	1.36	55.65	55.1	48.1	65.15
1	白金海	1	52	5.04	8.9	无	5	168	73	25.86	184	109	40.5	84	117.1	312.9	51.7	7.21	1.82	5.05	1.11	5.04	70.6	5.83	202.7	2.33	1.7	102.78	3.73	0.83552	8.9	#NULL!	13.69	7.55	0.12	30.63	27.47	无	1	2	1	1	1.14	70.24	3.57	53.85	54.25	44.7	52.65
1	袁庆生	1	60	4.49	6.6	无	5	172	74	25.01	103	69	43	9.6	17.1	6.2	54.2	6.48	1.26	4.44	1.3	4.49	111.6	6.3	416.4	2.44	1.2	61.45	3.3	0.658533	6.6	#NULL!	15.73	13.26	0.52	35.53	47.58	无	2	2	2	0	1.11	93.86	0.991	52.2	53.35	44.2	53.25
1	习立新	1	40	7.87	7.2	无	5	179	102	31.83	138	98	43.8	35.3	22	29.9	91.2	4.11	2.4	2.73	0.9	7.87	77.5	4.63	356	2.36	0.97	107.61	19.83	6.93609	7.2	20.93	23.38	11.37	0.05	38.3	35.19	无	1	2	1	0	1.41	94.13	2.16	56.95	59.45	45.6	54.25
1	刘冲	1	34	7.98	7.4	有	5	180	100	30.86	133	98	47	49.8	28.1	43.7	93.8	3.9	1.72	3.01	0.77	7.98	80.7	5.1	261.4	2.35	1.04	109.2	19.3	6.84507	7.4	#NULL!	10.13	16.4	0.39	56.82	54.71	无	1	2	1	0	2.3	111.6	1.63	55.7	53.45	49.05	50.65
1	张建辉	1	47	7.97	7.3	无	6	169	82	28.71	130	92	47.83	12.9	17.8	26.5	25.5	5.04	1.15	3.21	1.37	7.97	73.9	6.34	327.78	2.33	1.5	104.48	#NULL!	#NULL!	7.3	#NULL!	34.7	11.1	0.29	34.81	17.28	无	1	2	1	0	1.58	97.71	1.92	58.35	58.2	48.3	59
1	张胜	1	50	12.48	7.8	无	6	165	60	22.04	100	72	46.5	26.1	17.7	31.6	89.7	3.84	1.91	2.4	1.01	12.48	77.8	5.4	192.3	2.39	0.98	110.17	#NULL!	#NULL!	7.8	#NULL!	18.17	6.87	0.27	26.96	36.7	有	2	1	2	0	1.35	106.4	0.408	54.15	56.55	47.85	53.95
1	解崇玉	1	63	12.45	9.6	无	6	153	46	19.65	99	65	40.6	9.3	14.9	13	84.3	5.59	1.41	4.05	1.08	12.45	63	5.8	227.6	2.32	1.06	90.46	21.86	12.0959	9.6	#NULL!	28.38	16.72	0.4	33.92	29.22	无	2	2	2	0	1.13	89.32	2.1	58.9	57.05	47.85	60.4
1	王嘉婕	2	28	15.06	11.8	无	6	162	68	25.91	120	83	40.3	10.4	12.3	25.9	51.7	4.61	4.64	2.9	0.85	15.06	56.3	2.5	344	2.19	0.85	122.03	5.29	3.54077	11.8	#NULL!	#NULL!	#NULL!	#NULL!	#NULL!	#NULL!	无	2	1	2	0	1	82.23	4	54.3	54.2	45.1	57.3
1	付拴云	1	63	10.01	11.9	无	6	170	70	24.22	125	74	37.7	29.8	20.7	14	131.6	2.22	0.62	0.78	1.26	10.01	62.8	5.3	283	2.24	1.03	99.83	2.94	1.30797	11.9	49.89	23.39	8.64	0.35	32.47	28.96	无	1	1	2	0	1.06	81.21	1.01	54.95	55.3	46.1	51.85
1	李殿京	1	55	8.3	6	无	6	165	70	25.71	125	84	45.27	25.3	18.7	30.6	67.8	4.34	2.21	2.64	1.05	8.3	71.6	6.43	311	2.35	1.07	100.06	26.42	9.74604	6	14.06	20.56	11.28	0.46	32.97	45.86	无	1	2	2	0	1.89	98.51	1.13	58	58	49	58.35
1	李维英	2	71	6.65	6.5	无	6	160	74	28.91	121	84	40	14.4	29.3	12.9	53.5	5.61	1.37	3.59	1.18	6.65	63.6	5.1	315.9	2.22	0.93	84.55	#NULL!	#NULL!	6.5	19.49	22.38	11.37	0.27	41.03	41.12	无	1	2	2	0	1.41	61.85	3.91	57.85	53.4	48.45	55.25
1	解方淼	1	49	15.61	10	有	6	170	64	22.15	144	102	40.6	15.7	11.9	27.5	80.5	4.4	0.96	3.03	0.87	15.61	65.97	7.25	182.89	2.27	0.98	107.94	#NULL!	#NULL!	10	#NULL!	14.19	6.94	0.52	18.74	39.28	无	1	1	2	0	0.895	67.09	2.81	55.15	55.95	46.1	52.2
1	王增辰	1	54	4.76	11	有	6	164	69	25.65	115	70	42.2	16.5	18	16.9	79.4	4.15	1.19	2.47	1.16	4.76	79.7	7.9	232.2	2.27	1.44	96.42	0.865	0.182996	11	#NULL!	14.1	11.87	0.48	45.14	37.42	无	1	1	2	0	1.36	4.1	0.921	54.45	51.55	46.1	49.9
1	陈国英	1	70	8.89	8.2	有	6	160	65	25.39	143	75	40.5	13.3	17.8	14.4	77.7	3.27	1.4	1.32	1.78	8.89	73.8	5.1	316	2.28	1.34	71.18	#NULL!	#NULL!	8.2	#NULL!	19.5	13.9	0.16	35.85	59.8	无	1	2	2	0	1.2	72.49	4.32	62	58	54.5	64.25
1	刘树清	1	31	11.48	8.6	有	6	184	92.5	27.32	154	98	42.48	34.4	23.7	68.6	83.6	5.08	4.04	3.26	0.93	11.48	67.4	4.52	369.8	2.29	1.11	121.41	10.69	5.45428	8.6	#NULL!	12.35	14.04	0.18	59.45	49.73	无	1	1	1	0	1.25	78.27	1.81	57.6	58.95	45.75	62.45
1	侯文花	2	51	10.24	8.4	无	7	158	69	27.64	112	80	45.2	23.6	15.9	30.7	93.1	5.4	3.25	3.34	1.04	10.24	61.1	4.9	364.8	2.39	1.23	101.07	#NULL!	#NULL!	8.4	#NULL!	#NULL!	#NULL!	#NULL!	#NULL!	#NULL!	无	1	1	2	0	1.58	83.9	2.6	58.2	55.5	52.95	60.4
1	杨云	1	51	6.82	7	无	7	168	52	18.42	123	79	46.9	7.6	20.5	16.8	49.8	6.13	0.74	1.37	4.16	6.82	83.7	5.8	411.2	2.32	1.24	92.69	3.97	1.20335	7	#NULL!	25.61	12.44	0.26	27.91	36.1	无	2	2	2	0	1.34	90.58	3.56	60.6	57.65	47.7	59.15
1	赵勇军	1	45	9.34	6.5	无	7	178	86	27.14	137	91	44.4	32.7	21.3	32.1	64.9	4.92	3.86	3.29	0.84	9.34	98.1	6.07	304	2.33	1.02	79.78	#NULL!	#NULL!	6.5	18.56	18.34	15.9	0.07	46.54	21.19	无	1	2	2	0	1.5	82.94	2.05	57.45	58.5	43.3	59.95
1	高铁柱	1	40	7.68	8.7	无	7	174	86	28.41	117	71	40.8	158.4	107.6	90.8	65.5	5.51	3.44	3.82	0.82	7.68	63.8	4.6	357.3	2.21	1.2	116.58	7.57	2.58389	8.7	36.16	14.67	7.83	0.21	26.59	39.08	有	2	2	1	0	1.2	85.16	7.23	57.15	56.75	46.4	61.55
1	秦朋	1	34	11.88	9.4	无	7	180	91	28.09	119	77	46.5	77.1	44.9	35.3	113.1	3.38	3.99	2.23	0.59	11.88	66	4.9	267	2.24	0.82	119.91	14.94	#NULL!	9.4	31.55	24.27	10.52	#NULL!	#NULL!	28.77	无	1	1	1	0	1.56	119.7	1.2	57.7	59.85	46.7	59.75
1	董梅立	1	55	6.54	6.1	有	7	#NULL!	#NULL!	24.62	119	83	47.5	14.8	15.4	14.7	86.6	4.08	0.67	2.72	0.99	6.54	82	4.8	396	2.59	1.26	92.35	#NULL!	#NULL!	6.1	#NULL!	14.92	13.19	0.43	38.61	31.24	无	1	2	2	0	1.64	91.78	0.922	57	57	47	62.55
1	赵利山	1	33	8.74	10.6	有	7	180	95	29.32	136	82	40.2	43.7	30.5	32.7	76.2	4.77	2.26	3.07	0.8	8.74	66.4	3.8	403.1	2.15	1.27	120.46	6.91	2.68415	10.6	#NULL!	14.98	6.85	0.28	21.15	27.65	非增殖期	2	1	2	0	1.5	86.31	2.16	56.85	55.9	44.75	55.85
1	王立东	1	50	7.53	9.8	有	7	172	80	27.04	131	81	41.7	24	22.8	38.9	39.1	3.65	1.13	2.18	1.25	7.53	110.7	5.3	259.6	2.23	0.94	66.58	6.44	2.15525	9.8	#NULL!	13.49	10.5	0.24	29.4	49.56	有	1	1	2	0	1.44	76.42	1.71	52.35	51.3	43.55	59.05
1	叶梅	2	41	14.38	11.7	有	7	158	61	24.44	119	76	40.1	10.2	13.6	8.7	79.7	4.76	0.85	2.81	1.35	14.38	62.1	5.2	239.4	2.25	1.09	107.54	3.96	2.53088	11.7	#NULL!	20.69	8.87	0.15	37.11	43.64	有	1	1	2	0	1.16	90.32	4.25	61.4	56.1	48	51.9
1	谷亮	1	42	10.83	10.1	有	7	169	80	28.01	124	90	37.76	20.8	16.1	33	65.5	4.48	2.4	2.94	0.93	10.83	62.7	5.55	362.5	2.22	0.96	115.78	10.21	4.91441	10.1	#NULL!	21.42	8.28	0.22	21.01	20.13	有	1	1	2	0	1.66	91.61	0.761	62	57	46.5	62.1
1	马亚光	1	39	14.65	10.7	无	8	165	75	27.55	105	67	45.2	18.4	18.1	23.9	68	5.14	3.57	3.75	0.92	14.65	78.5	5.9	320	2.25	1.19	107.8	4.95	3.223	10.7	#NULL!	13.01	10.37	0.31	34.79	50.14	无	1	1	2	0	1.46	91.49	3.47	62.5	54.5	51	63.6
1	刘建国	1	70	5.77	6.3	无	8	165	70	25.71	169	83	43.1	35.5	38.9	38.1	69.4	5.9	1.41	1.53	3.71	5.77	85.6	5.4	467.6	2.32	1.04	78.94	12.33	3.16196	6.3	15.96	16.98	10	0.13	32.22	32.76	无	1	2	2	0	1.59	72.06	4.79	58.05	53.4	47.2	60.3
1	张壮军	1	46	6.98	7.3	有	8	170	85	29.14	106	73	43.5	24.5	21.4	25	72.1	4.37	2.85	2.85	0.89	6.98	80.8	3.5	232.7	2.26	1.29	100.25	89.68	27.8207	7.3	#NULL!	9.62	15.91	0.35	57.19	43.37	无	1	1	2	0	2.39	154.9	2.72	55.6	53.35	48.15	63.45
1	王兵海	1	56	12.88	10.4	有	8	165	80	29.38	161	89	45.2	15.4	10.6	22.1	113	5.67	13.01	2.95	0.58	12.88	75.2	5	251	2.29	1.34	97.38	5.87	3.36025	10.4	#NULL!	#NULL!	#NULL!	#NULL!	#NULL!	#NULL!	无	1	1	1	0	1.5	103.3	2.65	56.5	56.5	43.5	53.95
1	韩杰	1	50	7.62	7.9	有	8	178	98	30.39	146	103	40.7	16.6	16.9	36.7	73.6	5.28	2.74	3.66	0.97	7.62	83.8	4.5	396.3	2.24	0.93	93.28	25.29	8.56488	7.9	#NULL!	5.42	11.46	0.32	33.71	26.98	有	2	1	1	1	1.85	103.8	1.11	54.75	54.5	44.65	60.15
1	苗祥	1	32	10.46	7.9	无	9	182	100	30.49	137	72	42.9	39.2	27.1	81.5	82.5	5.26	7.92	2.97	0.94	10.46	66.4	4.7	569.8	2.41	1.43	121.3	#NULL!	#NULL!	7.9	#NULL!	16.86	6.61	0.18	24.77	25.05	无	1	1	1	0	1.52	93.2	2.62	58.35	56.3	44.05	58.35
1	段任江	1	55	7.6	6	有	9	173	95	31.74	147	84	40.7	16.4	22.4	19.4	50.1	4.59	0.61	2.92	1.28	7.6	75.07	6.58	356.47	2.22	0.9	98.13	#NULL!	#NULL!	6	#NULL!	19.85	11.35	0.29	30.22	46.51	无	2	2	2	0	1.47	88.53	1.71	62.4	57.35	45.85	53.4
1	李志亮	1	47	7.4	5.9	有	9	172	84	28.39	120	76	47.1	52.2	31.2	25.1	55.3	4.23	1.78	2.76	0.82	7.4	71.3	5.7	359.1	2.29	1.31	106.03	#NULL!	#NULL!	5.9	#NULL!	13.41	13.05	0.43	37.57	36.99	无	1	1	2	0	3.27	145.8	#NULL!	60	56.5	49.5	58.55
1	李桂茹	2	52	6.67	6.8	有	9	160	112	43.75	133	88	39.3	32.3	24.8	21.6	80.4	5.85	1.25	4.22	1.1	6.67	54.8	5.2	407.7	2.27	0.98	104.02	#NULL!	#NULL!	6.8	13.92	14.7	8.6	0.24	27.72	56.28	无	1	1	2	1	1.67	78.96	2.6	55.5	50	54.5	61.85
1	王金兰	2	54	13.32	10.8	有	9	155	66	27.47	130	66	41.9	16.2	19	33.9	69.4	5.49	0.92	1.49	3.76	13.32	49	4.2	243.2	2.33	0.93	106.39	8.71	5.15632	10.8	32.07	18.27	7.71	0.19	28.03	34.15	无	2	1	2	0	0.964	89.19	0.405	52.9	53.55	48.1	61.6
1	张丽叶	2	52	17.49	10.8	无	10	159	71	28	28.08	158	40	19.8	17.7	18.4	88.1	4.84	0.79	3.25	1.03	17.49	66.2	5.03	188.37	2.22	1.11	92.12	4.06	3.15597	10.8	#NULL!	21.3	12.96	0.25	44.1	56.7	无	1	1	1	0	1.23	91.14	2.52	54.8	52.65	46.15	66.35
1	郝连绪	1	52	15.75	9	无	10	170	80	27.68	127	87	43.49	16.8	14	37.5	106	5.22	1.76	3.6	1	15.75	84.6	6.35	240.9	2.21	1.01	90.86	2.14	1.498	9	#NULL!	15.26	17.28	0.22	53.2	39.61	有 非增值性	1	1	2	0	1.78	92.2	1.06	61.85	57.65	45	57
1	王济川	1	64	11.29	7.1	无	10	170	75	25.95	136	86	45.6	17.7	17.5	28.1	68.9	3.87	2.47	2.53	0.73	11.29	77.8	5.1	270.2	2.31	0.95	90.78	17.65	8.85638	7.1	36.57	25.24	16.05	0.37	29.55	58.66	无	2	1	2	0	1.57	100.3	1.95	54.35	51.85	43.9	55.85
1	孙俊兰	2	58	8.81	7.8	无	10	160	60	23.4	148	94	43.5	28.1	21.6	23.6	54.4	3.57	1.53	2.66	0.9	8.81	61.1	10.2	335	2.35	1.09	96.21	23.31	9.12716	7.8	30.02	18.83	10.95	0.18	22.61	47.94	无	2	1	2	0	1.63	103.5	1.13	53.8	54.3	43.9	57.4
1	王军	1	56	5.24	6.2	无	10	165	58	21.3	126	79	42.2	11.7	16.1	14.4	71.4	3.88	1.19	2.44	1.05	5.24	74.6	5.4	302.4	2.28	1.11	97.7	6.82	1.5883	6.2	16.35	21.95	23.41	0.73	67.15	40.87	无	2	2	2	0	1.79	113.7	2	56	63	53	50
1	杨艳勇	1	40	10.77	9.3	有	10	170	66	22.84	131	96	43.7	28.4	22.4	41.2	92	6.01	3.17	3.87	1.2	10.77	75.56	7.92	366.23	2.4	1.48	108.75	8.92	4.26971	9.3	#NULL!	25.77	11.61	0.73	39.61	31.64	无	1	1	2	0	0.972	81.64	2.12	61.1	59.3	45.6	52.15
1	孟亚明	1	37	7.65	10.4	有	10	162	69	26.29	123	93	39.3	47.1	31.6	48.9	82.9	4.51	3.53	3.09	0.96	7.65	80.7	4.6	284.9	2.24	1.28	106.84	4.92	1.6728	10.4	28.67	16.48	14.59	0.32	57.89	26.15	无	1	1	2	0	1.6	89.14	0.437	54.95	57.75	45.45	57.7
1	霍建森	1	46	9.67	7.6	有	10	169	94	32.91	123	86	47.5	25.5	21.1	46.1	64.3	6	4.78	4.13	0.95	9.67	68.5	4.4	468.9	2.61	1.53	108.52	17.86	7.67583	7.6	#NULL!	8.88	10.02	0.21	22.92	48.68	有	1	2	2	0	1	63.68	3.06	52.9	53.55	52.15	57.75
1	王军	2	71	7.38	7.1	有	10	165	100	36.73	148	82	38.04	16.8	18	20.9	81.8	3.64	1.46	2.28	0.89	7.38	78.9	5.53	355.6	2.19	1.22	65.2	#NULL!	#NULL!	7.1	#NULL!	17.59	12.6	0.16	60.94	48.61	无	1	1	2	1	1.33	78.99	3.06	53.5	55.5	46	57.75
1	郭彦平	2	59	4.55	6.4	有	10	164	60	26.03	87	53	45.3	27	32.2	37.1	59.3	4.68	2.07	2.99	1.18	4.55	76.5	7.9	338.4	2.42	1.25	73.63	#NULL!	#NULL!	6.4	#NULL!	20.51	18.17	0.54	39.9	39.48	无	1	1	2	0	1.54	99.31	6.37	54.95	57.3	46.55	61.85
1	许立群	1	54	8.05	8.2	有	10	180	86	26.54	135	81	40.8	33.9	25.4	43	86.1	3.87	1.68	2.65	0.9	8.05	77.5	3.6	427.5	2.28	1.17	97.52	7.46	2.66902	8.2	34.32	16.73	24.56	0.58	70.09	55.87	无	1	1	1	0	1.54	101.2	0.686	56	56.5	45	53.1
1	岳素君	2	56	14.8	10.5	有	11	166	82	29.76	139	86	41.6	31.6	23.9	17.9	94.5	4.52	1.69	2.59	1.37	14.8	65	5	408.4	2.46	1.27	91.57	16.87	11.0967	10.5	#NULL!	15.29	19.57	0.35	58.16	36.93	无	1	1	1	0	1.75	14.08	1.06	59.2	54.35	49.95	61
1	王润增	1	45	5.24	6.5	无	12	176	80	25.83	126	70	42.2	55.7	32.9	34.9	60.9	5.04	1.24	3.3	1.07	5.24	69.4	4.9	437.2	2.33	1.39	108.73	8.99	2.09367	6.5	36.51	20.54	13.31	0.27	33.98	34.99	无	1	2	2	0	#NULL!	#NULL!	#NULL!	57.35	55.2	46.2	59.65
1	冯克勤	1	51	7.44	5.7	有	12	178	89	28.09	157	91	48.7	19.2	17.6	77.3	59.1	4.25	1.84	2.47	1.26	7.44	65	5.51	355.6	2.36	1.12	107.09	#NULL!	#NULL!	5.7	12.77	18.01	8.59	0.32	29.89	77.97	无	1	1	2	1	1.46	78.82	2.39	55.35	57	45.35	63.4
1	苗树华	2	66	7.75	8.9	有	12	160	51	19.92	181	82	37.6	12.5	14.9	13.6	89.1	3.65	0.59	2.27	1.18	7.75	52.6	4.1	238.2	2.25	1.31	95.55	1.17	#NULL!	8.9	25.12	11.23	19.28	#NULL!	#NULL!	42.65	无	2	1	2	0	1.36	73.8	1.02	53.85	58.45	46.75	57.3
1	李春来	1	63	4.29	6.5	无	13	176	71	22.92	133	83	44.8	19.2	18.4	41.8	83.1	3.28	0.76	1.94	1	4.29	66.7	4.6	210.9	2.22	1.28	97.39	#NULL!	#NULL!	6.5	17.91	23.3	10.18	0.36	27.21	45.26	无	2	1	2	0	1.74	99.46	1.61	54.95	58.65	47.35	56.4
1	张克坚	1	56	9.06389	7.8	无	13	173	67	22.39	115	67	#NULL!	#NULL!	#NULL!		#NULL!	#NULL!	#NULL!	#NULL!	#NULL!	9.06	#NULL!	#NULL!	#NULL!	#NULL!	#NULL!	#NULL!	#NULL!	#NULL!	7.8	#NULL!	#NULL!	#NULL!	#NULL!	#NULL!	#NULL!	无	2	2	2	0	1.77	108.5	1.84	56.65	55.55	43.95	59.15
1	刘渝萍	2	65	6.85	8.3	无	13	159	67	26.5	129	70	39.86	23	15.3	20.1	102.1	5.87	4.05	3.82	1.07	6.85	53	4.38	211.5	2.29	1.15	95.99	13.97	4.25309	8.3	20.73	12.99	13.06	0.49	68.46	50.95	有	1	1	2	0	1.7	192.1	0.921	63.8	62.25	46.55	56.75
1	陈继明	1	64	9.06389	7.4	无	13	168	63	22.32	126	70	#NULL!	#NULL!	#NULL!		#NULL!	#NULL!	#NULL!	#NULL!	#NULL!	9.06	#NULL!	#NULL!	#NULL!	#NULL!	#NULL!	#NULL!	4.86	#NULL!	7.4	#NULL!	14.48	12.42	0.5	35.24	46.14	无	2	1	2	0	#NULL!	#NULL!	#NULL!	53.45	57.35	43.35	58.8
1	苗春青	1	55	5.09	6.5	有	13	172	77	26.03	139	70	38.1	20.6	20.3	21.9	69.5	4.56	1.44	2.95	0.9	5.09	71.8	3.4	202	2.06	0.88	99.95	9.04	2.04505	6.5	#NULL!	29.65	12.16	0.5	50.55	65.45	无	2	1	2	0	1.48	71.73	4.12	59.95	55.05	45.3	54.15
1	赵凤银	1	65	5.26	5.9	有	13	174	74	24.44	151	88	43.6	19	19.2	18.1	51.9	2.99	0.62	1.61	1.24	5.26	96.7	6.7	278.1	2.3	1.11	70.58	11.23	2.62532	5.9	15.73	39.58	8.86	0.22	24.52	43.79	无	2	2	2	0	1.32	90.9	0.448	59.8	59.8	48.8	58.75
1	杨爱文	1	48	10.97	7.8	有	13	170	77.5	26.82	140	99	47.9	28.6	20.8	48.9	78.8	4.43	1.84	3.23	0.82	10.97	80.3	7.4	262.7	2.31	1.12	99.54	#NULL!	#NULL!	7.8	#NULL!	15.51	11.83	0.43	33.89	42.73	非增值期	1	1	2	0	2.16	124	3.32	58.2	55	44.85	60.05
1	杜建萍	2	58	11.6	8.5	无	14	166	75	27.22	155	87	42	23.4	19.4	19.1	91.8	6.16	1.31	1.62	4.01	11.6	58.1	6	292.3	2.32	1.05	97.82	#NULL!	#NULL!	8.5	#NULL!	18.25	15.93	0.26	34.96	39.58	非增殖期	1	1	2	0	1.34	83.74	2.01	55.45	57.75	44.75	59.55
1	贺国友	1	54	6.5	8.6	有	14	173	74	24.73	116	71	41	17.4	15.8	22	52.9	2.85	1.27	1.64	0.85	6.5	68.96	3.02	335.97	2.29	1.09	102.33	#NULL!	#NULL!	8.6	#NULL!	#NULL!	#NULL!	#NULL!	#NULL!	#NULL!	有	1	1	2	1	1.8	119.5	3.43	53.65	55.75	45	55.35
1	王玉亮	1	60	3.94	8.6	有	14	190	95	26.32	163	84	42.45	16.3	12.4	19.1	68.1	5.05	1.08	3.34	0.89	3.94	100.9	8.16	280.1	2.28	1.23	69.42	8.71	1.52522	8.6	24.22	19.95	14.52	0.16	40.74	41.48	无	1	2	2	0	1.57	103.8	4.68	61	56.75	43.9	53.3
1	冯克刚	1	52	7.27	6.8	无	15	168	78	27.64	143	80	42.4	16.5	16.2	46.9	54.4	4.98	1.79	2.92	1.24	7.27	72.7	4.8	298	2.2	1.12	101.55	22.09	7.13752	6.8	#NULL!	10.37	14.07	0.5	42.76	45.61	无	1	2	2	0	1.28	58.04	1.15	61.35	357.35	52.1	57.6
1	赵英辉	2	43	5.96	6.4	无	15	163	61	22.96	108	73	39.8	13.1	14.9	17.7	37.3	4.78	0.72	2.79	1.47	5.96	65.9	4.4	342.3	2.27	1.22	98.67	8.88	2.35221	6.4	#NULL!	#NULL!	#NULL!	#NULL!	#NULL!	#NULL!	无	1	2	2	0	1.35	90	0.708	62.9	60.75	50.9	63.35
1	王大俭	2	77	7.95	7	有	15	165	77	28.28	170	90	43.8	22.1	34	50.7	135.7	4.68	0.93	2.95	1.32	7.95	68.3	5.2	268	2.24	1.15	74.42	5.6	1.97867	7	#NULL!	14.85	17.34	0.59	60.22	59.4	非增殖期	1	1	2	0	1.84	118.3	19.73	54.65	56.25	44.15	52.55
1	姜言军	1	58	6.84	6.9	有	15	183	75	22.4	112	72	43.1	24.6	26.3	39.4	66.3	4.4	0.98	2.63	1.2	6.84	79.8	5.1	247.8	2.22	1.08	93.7	16.86	5.12544	6.9	#NULL!	17.5	16.13	0.6	50.04	49.26	无	1	1	2	0	1.89	98.69	0.204	55.35	56.95	47.35	62.4
1	董艳茹	2	61	11.29	10.8	有	15	150	51	22.67	181	89	39.3	28.1	19.6	26.9	111.2	5.68	0.72	2.07	3.18	11.29	65.7	5.7	332.9	2.25	1.34	87.27	6.75	3.387	10.8	#NULL!	17.37	20.73	0.42	49.88	41.27	无	2	1	2	1	1.6	88.52	1.89	60.5	58.5	49.5	57.9
1	杨庆辉	1	56	4.95	6.2	无	16	172	62	20.96	111	77	39.12	9.4	10.4	11.7	70.8	5.38	1	3.77	1.05	4.95	76.3	6.81	332.2	2.2	1.16	96.8	3.33	0.7326	6.2	20.54	14.8	13.35	0.24	27.04	32.86	无	1	2	2	0	1.44	90.27	2.63	64.05	60.7	43.9	57.2
1	陈荣秀	2	70	8.09	6.7	有	16	153	50	21.36	143	65	44.8	17.8	22.6	12.1	83.5	6.02	1.14	3.71	1.78	8.09	68.8	4.4	291.9	2.5	1.4	77.48	#NULL!	#NULL!	6.7	#NULL!	15.15	25.54	0.6	56.78	61.59	无	1	2	2	0	1.36	92.03	3.63	59.4	51.25	46.8	51.7
1	任凤志	1	53	6.75	7.3	有	16	175	71	23.18	172	99	39.1	14.5	18.2	15.3	52.5	3.64	1.89	2.33	0.79	6.75	59.9	4.74	249.1	2.15	1.1	109.2	4.95	1.485	7.3	#NULL!	9.4	0.04	15.99	10.12	0.2	有	1	1	2	0	1.32	71.14	2	60.05	55.6	44.95	55.1
1	董贵玲	2	66	6.1	8.6	有	17	156	60	24.65	155	99	40.69	16.7	12.9	14.3	87.4	6.39	2.01	4.38	1.06	6.1	61.9	4.59	308.28	2.31	1.64	90.57	#NULL!	#NULL!	8.6	#NULL!	12.06	16.7	0.42	55.51	30.8	有	1	2	2	0	1.1	89.51	3.34	54.35	59.2	46	58.6
1	赵英建	1	59	5.39	6.1	有	17	168	59	20.9	135	79	45.5	20.2	19.5	13.6	76.3	3.63	0.7	2.14	1.32	5.39	72	5.1	304.4	2.36	1.17	97.05	2.36	0.565351	6.1	#NULL!	14.18	10.68	0.28	56.78	43.7	非增殖期	2	1	2	0	2.41	82.92	1.36	62.7	58.15	46.95	60.15
1	李丹丹	2	37	6.55	9.4	无	18	160	68	26.56	116	74	42.7	24.8	21.6	31.1	84.5	4.04	1.57	2.57	0.97	6.55	54.1	4.5	231.16	2.25	1.37	116.06	#NULL!	#NULL!	9.4	#NULL!	12.2	13	0.4	47.71	47.83	无	2	1	2	0	1.24	75.97	1.33	56.45	56.85	54.4	65.8
1	李烨	2	50	5.34	7.4	无	18	163	59	22.21	110	73	38.9	11.7	18.1	15.2	72.4	5.1	0.57	3	1.74	5.34	68.4	4.2	139.9	2.05	0.99	89.82	#NULL!	#NULL!	7.4	#NULL!	#NULL!	#NULL!	#NULL!	#NULL!	#NULL!	无	2	1	2	0	1.34	81.7	0.614	60	61.15	48.35	60.3
1	王金凯	1	70	5.95	8.1	有	18	175	82	27.72	147	78	40.2	11.3	18.3	32.732.7	126	4.04	1.2	1.13	2.57	5.95	72	4.6	240.2	2.23	0.79	89.86	#NULL!	#NULL!	8.1	#NULL!	19.5	17.02	0.55	52.31	52.18	无	1	2	2	0	2.15	108.8	1.31	64	57	44.5	55.7
1	马建武	1	51	6.38	8.84177	无	19	174	79	26.09	145	84	43	28.2	30.6	108.7	61.3	6.25	1.73	1.35	4.07	6.38	72.3	4.8	376.7	2.25	1.09	102.5	#NULL!	#NULL!	8.8	#NULL!	27.42	9.04	0.14	19.88	48.95	无	1	2	2	0	1.57	74.26	4.12	67	57.5	49	62.05
1	褚碧章	1	79	8.01	11	有	19	167	75	26.89	152	78	37.4	10.8	14.5	18.5	75.7	2.64	0.54	1.53	0.97	8.01	125.1	9.68	349.3	2.21	1.13	46.19	1.08	0.38448	11	#NULL!	8.6	15.17	0.04	40.06	33.33	有	2	1	2	冠心病 稳定型心绞痛	1.03	89.37	0.349	54.7	60.75	48	56.45
1	鲁国梁	1	66	3.87	10.1	无	20	178	74	23.4	142	77	37.9	9.8	24	12.5	50.8	4.46	0.68	1.21	3.02	3.87	78.2	6.6	337.4	2.41	0.76	89.34	3.66	0.62952	10.1	35.12	26.61	13.09	0.19	19.63	26.05	无	2	1	2	0	1.51	70.46	2.46	53.6	54.95	43.85	52.4
1	何三民	1	66	5.25	7.6	无	20	170	63	21.8	146	77	38.5	11.9	17.1	25.5	63.8	4.93	0.99	0.82	3.77	5.25	71.1	3.9	254.4	2.19	1.01	92.89	4.88	1.13867	7.6	24.77	13.41	10.12	0.3	22.76	47.92	无	2	1	2	0	1.55	94.57	2.97	59.65	52.3	47.6	54.95
1	张旭芳	1	55	10.34	8.9	无	20	170	75	25.95	164	89	48.1	16.8	16.5	31.6	61.2	4.7	3.68	0.85	3.11	10.34	88.7	7.6	421.1	2.46	1.07	84.02	46.63	21.4291	8.9	23.2	14.31	9.29	0.29	26.6	43.2	非增殖期	2	1	2	0	1.46	106.2	1.21	55.25	53.6	51.7	61.8
1	王志庭	1	58	10.17	8.7	无	20	172	80	27.04	131	75	40.8	17.9	17	17.9	67.2	4.72	3.35	3.46	0.75	10.17	85.7	6.7	305.5	2.29	0.97	86.25	11.09	5.01268	8.7	36.13	32.1	15.73	0.32	49.84	59.79	无	2	1	1	0	1.16	61.72	1.89	52.95	53.85	44.2	56.35
1	周忠义	1	59	10.43	8.1	有	20	178	89	28.09	125	72	44.7	33.9	22.9	47.5	69.1	4.9	3.46	3	0.81	10.43	84.7	7.5	337	2.38	1.07	86.38	#NULL!	#NULL!	8.1	#NULL!	#NULL!	#NULL!	#NULL!	#NULL!	#NULL!	有	1	1	2	0	1.78	129.9	2.12	53.55	54.25	43.95	57.9
1	邹世华	1	73	4.89	6.3	有	20	170	73.3	26.26	150	85	43.1	11.9	23.5	163.1	109.1	3.43	0.96	2	1.14	4.89	80.6	5.5	255.3	2.25	1	83.13	12.8	2.78187	6.3	#NULL!	26.63	10.65	0.26	33.51	36.53	无	2	1	2	0	1.49	85.86	1.57	59	54.35	44.25	50.95
1	陈造平	1	67	7.27	8.4	有	20	172	78	26.37	169	82	40.5	17.1	18.1	21	60.9	5.35	0.88	3.42	1.13	7.27	80.4	4.9	356.7	2.42	1.18	86.97	3.38	1.09212	8.4	#NULL!	26.92	9.79	0.28	34.35	24.74	无	1	2	2	0	1.57	76.45	1.11	60	55	44.5	55.4
1	荣军	1	62	12.53	8.9	无	21	170	85	29.41	144	96	42	25.9	19.5	27	97.3	4.02	0.72	1.17	2.4	12.53	74.5	6.4	214	2.36	1.1	93.7	11.07	6.16476	8.9	#NULL!	19.89	16.15	#NULL!	42.59	50.53	有	1	2	1	0	1.88	130.7	1.99	60.45	56.4	47.35	63.75
1	杜艳华	2	60	13.7	12	无	25	165	59	21.67	153	98	37.8	18.8	23.1	24.6	139.8	6.09	1.05	1.27	4.32	13.7	57.5	2.7	217.8	2.43	1.26	96.79	#NULL!	#NULL!	12	#NULL!	16.58	37.57	0.91	122.2	34.99	非增殖期	2	1	2	0	1.09	86.15	2.38	55.6	54.6	46.9	54.5
1	孟战表	1	72	8.31	7.8	有	30	174	73	24.11	135	75	40.5	20.3	16.8	24	119.3	2.95	1.07	0.94	1.84	8.31	84.8	6.7	272.9	2.29	1.19	78.73	15.22	5.62125	7.8	#NULL!	19.95	10.54	0.15	25.92	21.92	有	1	1	2	1	1.63	79.99	1.11	53	54.25	46.55	57
[truncated: 33 more columns]

## Sheet: 2组
分组	姓名	性别	年龄2	新空腹血糖	新糖化	神经病变有无	病程2	身高	体重	BMI	收缩压	舒张压	白蛋白	谷丙丙氨酸	谷草天冬氨酸	r谷氨酰	碱性磷酸酶	总胆固醇	甘油三酯	低密度	高密度	旧FBG	肌酐	尿素氮	尿酸	血钙	血磷	肾小球滤过率	空腹胰岛素	HOMAIR	糖化血红蛋白_1	糖化白蛋白	维生素D3	骨钙素	B胶原特殊序列	总I型胶原氨基酸延长肽	甲状旁腺素	视网膜病变有无	有无二甲双胍	有无用胰岛素	有无GLP1	冠心病0无1有冠心病无心梗2有过心梗的	总T3	总T4	TSH	尺神经运动	正中神经运动	腓总神经运动	尺神经感觉
2	张爱民	1	46	12.92	10.8	无	0.01	170	90	31.14	140	94	44.4	48.6	34.3	72.2	85.6	4.98	1.79	0.93	3.61	12.92	70.7	4.8	322.6	2.35	1.23	107.15	#NULL!	#NULL!	10.8	#NULL!	#NULL!	#NULL!	#NULL!	#NULL!	#NULL!	无	1	1	2	0	1.46	67.33	2.41	55	52.95	43.7	62.15
2	赵永海	1	44	18.83	9.5	有	0.01	170	89	30.8	142	83	42.2	17.9	17.4	19	91.3	3.54	1.52	2.41	0.8	18.83	67.5	4.3	314.8	2.22	0.92	110.75	14.16	11.8503	9.5	41.66	18.93	18.83	0.43	50.29	42.68	有	1	1	2	0	1.45	92.98	1.35	44	46.95	39.55	54.6
2	李彦荣	2	45	17.77	10.8	有	0.02	168	70	24.8	134	95	46.3	20	19	43.3	91.8	6.5	3.5	4.26	1.4	17.77	63	3.7	195	2.39	1.13	102.79	14.46	11.4202	10.8	#NULL!	17.46	8.09	0.27	23.69	64.57	无	2	1	2	0	1.38	81.53	2.7	60.1	53	42.65	62.35
2	张栋才	1	73	6.83	9.7	有	0.02	178	71	22.41	124	77	39.4	16.2	49.2	25.2	87.9	4.61	0.65	3.11	1.23	6.83	71.94	6.29	213.77	2.21	1.07	88	10.47	3.17823	9.7	#NULL!	15.8	11.72	0.3	33.24	46.73	无	1	1	2	0	1.34	87.99	3.5	55.55	52.35	37.1	57.7
2	焦彦虎	1	46	13.65	13.4	有	0.02	172	76	25.69	120	76	36.2	10.4	13.2	11	133.2	3.55	1.8	0.56	2.44	13.65	67.2	6.3	438	2.12	0.92	109.41	9.21	5.5874	13.4	31.04	14.96	15.77	0.34	41.97	25.93	非增殖期	2	1	2	1	1.58	82.5	1.45	44.3	46.3	40.7	45.8
2	闫明拴	1	46	12.52	8.84177	有	0.05	#NULL!	80	27.68	106	70	38.2	9.9	11.5	15.6	94.6	5.8	1.63	4.04	0.93	12.52	71.5	5.4	174.8	2.26	1.16	106.63	8.78	4.88558	8.8	#NULL!	31.82	13.47	0.58	35.31	26.46	无	2	1	1	0	1.11	74.9	1.05	54.15	48.9	38.8	56.8
2	张兰利	1	55	5.74	9.7	有	0.09	178	67	24.36	176	121	36.62	21	18	42.1	91.4	4.76	2.31	3.15	1.01	5.74	72.9	5.03	339.79	2.24	1.1	99.32	#NULL!	#NULL!	9.7	#NULL!	20.45	10.64	0.51	35.66	45.08	无	1	2	2	0	1.43	83.87	1.71	59.3	54.65	42.85	59.85
2	刘伟	1	47	12.81	11.2	有	0.1	175	85	27.76	126	85	42.7	26.2	29.6	54.3	89.8	4.76	2.49	3.5	0.81	12.81	93.2	5.9	402.6	2.29	0.89	83.66	15.15	8.6254	11.2	38.26	17.28	14.53	0.51	28.59	80.44	无	1	2	1	0	1.3	91.91	1.44	53.1	52.7	44.05	62.85
2	薛恃峰	1	35	11.25	12.3	有	0.1	170	85	29.41	123	75	38.1	20.6	16.4	30.3	81	5.44	1.75	0.9	3.94	11.25	63.3	3.8	423.6	2.17	1.46	121.14	13.35	6.675	12.3	#NULL!	13.01	15.73	0.6	53.42	43.02	无	1	1	2	0	1.35	68.72	1.8	50.15	53.4	45.9	58.05
2	程远英	2	55	17.3	12.4	有	0.1	157	58	23.53	157	107	45.8	16.7	19.6	34.1	157.5	6.72	2.53	4.19	1.22	17.3	57.3	5.2	217.3	2.41	1.08	100.36	9.65	7.41978	12.4	#NULL!	13.05	14.01	0.43	42.01	46.52	有	1	1	2	0	1.35	88.2	3.18	45.25	45.5	38.15	45.8
2	党晋云	1	66	10.47	13.9	有	0.11	174	84	27.74	162	94	38.2	28.5	29.4	27.2	77	5.45	1.32	1.37	3.81	10.47	77.5	4.4	268.8	2.41	1	89.65	4.2	1.9544	13.9	45.76	16.64	10.37	0.36	35.97	45.07	无	1	1	2	0	1.68	108.2	4.09	47.4	48.9	39	45.95
2	彭建菊	2	56	16.38	13	有	0.2	157	65	26.37	104	65	40.5	32.3	31.2	28.5	72.1	3.96	0.81	2.74	0.97	16.38	64.1	5.6	277.2	2.32	1.23	93.06	5.38	3.91664	13	#NULL!	14.68	10.86	0.3	44.94	30.67	非增值期	1	1	2	0	1.38	82.56	2.94	54.35	53.35	47.25	62.7
2	王贵荣	1	77	12.48	12.5	有	0.2	159	65	25.71	115	63	36.2	14.9	26.9	14.6	48.1	2.46	2.29	1.26	0.67	12.48	92	7.6	286.5	2.29	0.92	68.88	#NULL!	#NULL!	12.5	#NULL!	16.92	6.55	0.12	22.19	20.28	无	2	1	2	0	1.27	79.99	3.61	53.4	54.95	36.85	48.55
2	王建刚	1	60	9.71	14	有	0.2	176	76	25.18	128	73	36.1	25.3	30.1	14.4	81.1	3.6	1.61	2.14	0.8	9.71	101.1	7.1	367	2.29	1.29	69.25	18.51	7.98809	14	#NULL!	#NULL!	#NULL!	#NULL!	#NULL!	#NULL!	无	1	2	2	1	1.06	91.91	2.01	47.85	47.25	41.7	44.75
2	贾超	1	30	8.67	11.8	有	0.3	183	95	28.37	134	91	38.7	29.1	25.2	79.2	96.9	5.35	4.23	3.36	0.96	8.67	60.24	6.52	455.91	2.24	1.72	128.05	#NULL!	#NULL!	11.8	#NULL!	12.78	11.67	0.39	41.92	67.16	无	1	1	1	0	1.77	80.69	2.33	54.25	54.6	42.05	62.95
2	于彦辉	1	48	5.45	6.5	有	0.3	172	108	36.51	125	74	43	20.5	16.5	51.1	117	4.29	1.31	1.01	2.94	5.45	79.8	6	407.4	2.28	1.25	100.52	29.51	7.14798	6.5	12.93	23.3	9.15	0.19	28.96	52.01	无	2	2	1	0	1.3	65.8	1.52	57.35	55.95	46.1	55.75
2	王立明	1	38	5.6	10.5	有	0.4	158	76	30.44	151	106	38.9	43	40.4	56.9	103.7	3.67	1.62	2.33	0.86	5.6	66	4.1	248.4	2.26	1.13	116.59	13.12	3.26542	10.5	#NULL!	22.15	16.26	0.78	52.33	51.88	无	1	1	1	0	#NULL!	0	1.49	56	54	45.5	62
2	王忠阳	1	29	8.1	14.6	有	0.5	175	117	38.2	167	118	42.4	26.2	23.5	25.7	131.5	6.04	2.11	3.88	1.04	8.1	74.7	5.2	402.8	2.42	1.44	118.04	5.21	1.8756	14.6	#NULL!	#NULL!	#NULL!	#NULL!	#NULL!	#NULL!	无	1	2	1	0	1.41	90.26	4.31	50.95	52.1	39.9	55.45
2	王昌法	1	45	10.69	10.1	有	0.6	172	107	36.17	135	95	47.42	33.7	28	38.2	107.1	5.98	2.78	3.75	1.17	10.69	83.4	5.58	493.6	2.47	1.15	97.11	#NULL!	#NULL!	10.1	24.47	25.62	11.44	0.39	33.62	58.07	无	1	2	1	0	1.64	86.02	1.74	61.65	53.65	43.9	63.6
2	姚保然	2	52	16.77	12.4	有	0.6	167	61	21.87	159	81	42.5	18.7	16.6	23.4	99.6	5.97	1.32	1.17	4.15	16.77	58.3	7.2	221.7	2.45	1.21	101.94	3.4	2.53413	12.4	#NULL!	12.69	19.83	0.93	68.54	43.37	无	1	1	2	0	1.3	87.62	1.76	57.65	46.1	43.45	53.65
2	郭三平	1	56	11.33	10.6	有	1	175	95	31.02	138	73	39.9	11.1	12.3	17.9	48.7	4.18	0.7	2.77	1.36	11.33	76.2	6.7	204	2.24	1.18	96.84	8.81	4.43632	10.6	#NULL!	16.58	20.9	0.45	43.21	33.12	无	1	1	2	1	1.76	115.1	1.38	54.15	52.3	41.5	56.1
2	韩军基	1	50	10	8.84177	有	1	178	90	28.41	111	78	41.4	19	17.9	18	93.4	4	6.62	0.54	2.39	10	78	8.2	186.8	2.14	1.14	100.05	#NULL!	#NULL!	8.8	#NULL!	10.09	17.93	0.44	68.94	30.24	无	1	1	2	0	1.3	106.1	0.624	57	56	42	53.35
2	张建菊	2	53	9.13	7.1	有	1	165	73	26.81	146	89	43.6	46.5	31.1	33.5	61.7	5.21	5.35	3.42	0.86	9.13	62.4	6.2	415.6	2.38	1.29	98.25	19.1	7.75036	7.1	35.26	21.4	18.82	0.72	58.74	38.78	无	2	1	2	0	1.26	91.43	3.02	57	55.05	44.7	57.3
2	马振华	1	42	19.94	12.5	有	1	168	65	23.03	96	73	42.6	38.9	30.3	55	91.6	4.66	1.07	3.4	0.95	19.94	81.3	6.2	370.6	2.37	1.21	102.25	3.38	2.99543	12.5	#NULL!	12.76	12.18	0.3	28.26	33.25	无	1	1	2	0	3.61	111.3	0.426	55.3	54.7	39.8	53.55
2	常玉荣	2	58	6.02	7.8	无	1	113	75	27.06	113	75	44.8	37.8	34.6	39.9	129.2	5.58	1.56	3.64	1.29	6.02	74.5	5.29	453.6	2.32	1.17	76.56	#NULL!	#NULL!	7.8	#NULL!	16.12	27.1	0.57	83	62.02	无	1	2	2	0	1.81	102.8	3.06	61.8	63.8	46.4	65.35
2	徐宁	2	56	6.87	7	无	1	166	75	27.22	108	69	41.1	114.2	66.9	75.2	100.5	6.55	1.42	4.46	1.28	6.87	69.4	3.8	322.1	2.32	1.48	84.66	9.77	2.98311	7	#NULL!	10.98	15.21	0.44	40.02	26.55	无	2	2	2	0	1.6	78.22	9.2	64.8	54.6	50.5	59.45
2	张珠峰	1	33	12.95	9.9	有	1	181	100	30.52	147	111	44.6	38.5	37.1	75	136.5	5.39	2.58	3.41	0.99	12.95	81.8	4.38	404.3	2.47	1.04	108.12	#NULL!	#NULL!	9.9	#NULL!	16.66	10.99	0.44	37.6	70.23	无	1	1	1	0	1.73	120.4	2.8	54.2	54.8	39.9	58.7
2	林田雨	1	28	9.06389	8.84177	有	1	183	88	26.28	135	84	#NULL!	0	#NULL!		#NULL!	0	#NULL!	#NULL!	#NULL!	9.06	#NULL!	0	#NULL!	0	#NULL!	#NULL!	4.09	#NULL!	8.8	#NULL!	16.54	9.29	0.38	29.71	29.67	有	1	1	2	0	1.99	94.78	1.37	51	59	41.5	52.3
2	史俊河	1	49	5.64	9.8	有	1	178	80	25.25	135	85	39.9	15.9	13.4	28.3	109.9	4.53	0.96	2.67	1.1	5.64	82.9	8.1	415.2	1.16	0.93	95.1	4.14	1.03776	9.8	#NULL!	10.89	15.58	0.54	31.94	51.45	无	2	1	2	0	1.75	107.1	2.05	51.5	54	43	52.15
2	任建国	1	63	5	9.2	有	1	175	80	26.12	115	63	34.3	20.3	16.6	26.9	62.3	3	0.68	1.73	0.93	5	135.7	9	407.2	2.25	1.25	47.5	3.95	0.877778	9.2	#NULL!	#NULL!	#NULL!	#NULL!	#NULL!	#NULL!	有	2	1	2	0	3.38	82.61	0.364	47.25	45.75	#NULL!	53
2	刘海正	1	57	7.45	5.5	有	2	170	79	27.34	151	89	45.4	34.7	51.7	63.9	56	5.22	1.43	3.15	1.43	7.45	73.8	2.6	314.8	2.33	1.34	97.45	#NULL!	#NULL!	5.5	#NULL!	16.34	16.05	0.54	50.54	37.11	无	2	2	2	0	2.18	99.94	1.49	53.35	57.6	42.3	45.65
2	崔卫江	1	47	8.62	7.5	有	2	181	75	22.9	103	64	43.6	29.5	23.8	74.9	52.4	4.7	2.53	3.22	0.97	8.62	70.8	4.2	393	2.33	1.18	106.33	4.96	#NULL!	7.5	#NULL!	22.38	11.32	#NULL!	#NULL!	42.45	无	1	1	2	0	1.89	102.5	2.55	59.45	58.9	41.55	50.55
2	翁桂岚	2	74	4.56	6.2	有	2	150	47	20.89	124	54	41	10.4	19.2	14.1	51.8	6.37	0.62	1.45	4.28	4.56	67.4	4.6	322.6	2.32	1.3	77.23	#NULL!	#NULL!	6.2	#NULL!	27.66	17.03	0.6	52.38	34.12	无	2	2	2	0	1.43	84.16	1.19	58.5	57.5	52	58.8
2	李明廷	2	52	10.79	6.7	有	2	160	68	26.56	118	88	45.3	11.6	12.8	54.6	95.2	5.88	1.02	3.74	1.21	10.79	49.8	4.4	401.6	2.51	1.44	107.34	13.04	6.2534	6.7	#NULL!	16.63	17.65	0.51	49.82	25.61	无	2	1	2	0	2.07	131.6	2.51	49.5	48	39	50
2	王素英	2	66	30.7	10.1	有	3	168	0	#NULL!	185	102	43.1	14.5	16.5	20.5	113.4	6.58	1.42	3.99	1.52	30.7	61.2	3.9	305.4	2.5	1.31	90.91	10.91	14.8861	10.1	#NULL!	15.16	14.4	0.37	35.49	43.09	无	2	1	2	0	1.32	103.7	0.916	56.5	56	45	50.2
2	邱玉生	1	56	6.39	8.6	有	3	183	82	24.49	112	78	35.2	41.8	48.7	199.7	73.7	5.72	2.54	0.91	3.94	6.39	68.1	4.2	302.6	2.16	1.17	101.43	#NULL!	#NULL!	8.6	#NULL!	#NULL!	#NULL!	#NULL!	#NULL!	#NULL!	无	1	2	2	0	2.04	95.75	1.73	57.5	53.5	46	59.1
2	安晓莉	2	40	6.67	8.8	无	3	156	64	25	135	88	42.4	23.4	20.9	47.2	89.6	3.91	1.35	0.92	2.6	6.67	64.8	4.5	476.1	2.26	1.28	102.84	#NULL!	#NULL!	8.8	#NULL!	14.81	12.49	0.25	30.16	61.04	无	1	1	2	0	1.37	91.95	2.49	57.1	61.65	46.35	67.9
2	柳明长	1	57	15.57	13.1	无	3	169	72	25.21	113	57	35.6	8.2	10.3	24.3	64.9	4.52	1.36	0.98	3.21	15.57	76.4	4	193.3	2.15	1.22	96.08	7.46	5.16232	13.1	#NULL!	12.29	15.11	0.38	42.19	32.77	无	1	1	2	0	1.49	78.55	1.32	52.4	51.5	43.4	58.3
2	刘亚东	2	28	7.73	7.4	有	3	160	66	25.78	126	83	40.4	25	17.2	17.5	68.3	3.34	1.38	0.9	3.18	7.73	49	4.6	344.9	2.23	1.33	127.71	18.37	6.31112	7.4	#NULL!	#NULL!	#NULL!	#NULL!	#NULL!	#NULL!	无	1	1	2	0	1.76	99.92	1.89	50.15	56.05	44.05	57.2
2	石军	1	47	14.76	10.2	有	3	175	82	27.08	120	80	42	24.4	16.4	38.3	68.9	4.3	1.46	3.12	0.91	14.76	74.1	4.3	216.7	2.17	1.05	104.36	16.96	#NULL!	10.2	28.31	23.45	14.86	#NULL!	#NULL!	26.89	无	1	1	1	0	1.71	106.8	1.08	54.85	53.3	41	55.6
2	史灵先	2	64	10.69	7.7	有	3	148	60.5	27.62	176	97	41.7	11	17.8	18.6	103	8.71	8.09	4.81	1.02	10.69	97.2	12.91	354.2	2.46	1.15	53.25	#NULL!	#NULL!	7.7	#NULL!	#NULL!	#NULL!	#NULL!	#NULL!	#NULL!	有 非增值性	2	1	2	0	0.976	80	5.68	57.5	55.5	43.5	62.2
2	雷兰勤	2	68	8.35	8.1	有	3	166	75	27.22	113	78	43.7	20.8	23	62.3	125.3	6.28	2.49	4.51	1.17	8.35	73.2	4.2	223.7	2.34	1.26	72.91	22.76	8.44649	8.1	#NULL!	10.52	20.82	0.4	46.95	36.62	无	1	2	2	0	1.46	74.33	4.61	47.95	55.05	47.9	57.9
2	李占元	1	68	10.43	9.3	有	3	172	60	20.28	157	96	#NULL!	0	#NULL!		#NULL!	0	2.01	#NULL!	#NULL!	10.43	#NULL!	0	#NULL!	0	#NULL!	#NULL!	4.43	2.05355	9.3	#NULL!	13.31	25.88	0.95	88.71	35.53	有	2	1	2	0	1.53	119.2	1.11	51.7	48.9	37.75	47.25
2	穆红政	1	41	6.59	8.2	有	3	172	85	28.73	162	102	37.2	44.7	30.3	32.4	44.9	4.36	2.41	2.83	0.71	6.59	78	5.4	241.3	2.17	1.02	106.56	#NULL!	#NULL!	8.2	#NULL!	#NULL!	#NULL!	#NULL!	#NULL!	#NULL!	有	2	1	2	0	1.39	78.58	3.68	46.45	46.2	43.6	54.3
2	李大领	1	64	6.11	7	有	3	173	93	31.07	122	82	40	12.3	17.1	27.3	35.3	5.3	0.73	3.51	1.22	6.11	69.32	5.47	327.1	2.33	1.21	95.19	105.4	28.622	7	#NULL!	22.4	14.42	0.37	61.89	53.35	无	1	1	2	0	1.6	97.4	2.05	56.4	47.75	46.8	#NULL!
2	梁成栓	1	61	6.2	5.6	有	4	175	95	31.02	144	79	42.6	16.2	37.8	164.2	79.3	2.57	1.12	1.31	1.08	6.2	59.8	2.5	460	2.32	1	103.28	#NULL!	#NULL!	5.6	#NULL!	12.98	13.05	0.27	33.23	54.14	无	1	2	2	0	1.69	88.45	4.11	52.8	54.05	37.65	49.7
2	刘秀珍	2	74	7.35	8	有	4	155	64	26.64	134	84	41.4	11.1	15.7	17.5	76.1	3.36	1.36	2.13	0.95	7.35	61.1	6.1	275.9	2.35	1.17	85.99	17.29	5.64807	8	#NULL!	15.28	22.78	1.04	83.37	61.36	非增值期	2	2	2	0	1.64	79.98	2.72	59.6	54.05	47	53.3
2	周吉阳	1	38	7.56	9.8	有	4	180	90	27.78	172	100	43.9	15.9	14.9	17.5	71.3	5.57	4.19	3.76	0.82	7.56	130	6.9	330.5	2.23	1.21	59.66	#NULL!	#NULL!	9.8	#NULL!	#NULL!	#NULL!	#NULL!	#NULL!	#NULL!	有	1	1	2	0	1.39	105.2	0.964	48.35	55.05	40.45	55.05
2	韩金花	2	55	3.71	9.4	有	4	156	51	20.96	129	85	30.8	27.1	66.3	163.4	361.8	5.23	1.21	3.44	1.24	3.71	52.9	4.86	197.8	2.19	1.52	103.03	#NULL!	#NULL!	9.4	53.44	15.4	15.3	0.42	40.2	13.83	无	2	1	2	0	1.26	105.8	0.707	46.4	48.35	39.95	52.3
2	董新民	1	64	14.53	9.8	有	5	176	95	30.67	121	76	42.5	38.2	24.1	48.6	76.2	4.04	2.81	0.88	2.62	14.53	77.5	5.5	466.1	2.38	1.29	90.91	19.97	12.8962	9.8	#NULL!	28.58	8.77	0.15	30.44	25.75	糖网病？	2	1	2	2	2.13	91.82	1.77	56	53	43.45	53.8
2	岳文峰	1	48	7.56	7.9	有	5	185	105	30.68	133	100	38.5	40.3	38.6	155.8	82.2	4.8	2.67	2.99	0.87	7.56	57.8	2.7	348.8	2.25	1.03	114.75	10.01	3.36336	7.9	#NULL!	20.02	10.62	0.67	32	45.36	无	2	1	1	1	1.34	109.4	1.48	54.25	53.4	37.85	53.2
2	宋玉梅	2	67	12.58	7.5	有	5	160	68	26.56	161	105	37.1	11.9	11.3	18.4	74.8	3.49	0.63	1.04	2.11	12.58	166.1	12.6	322.7	2.29	1.29	27.26	#NULL!	#NULL!	7.5	#NULL!	#NULL!	#NULL!	#NULL!	#NULL!	#NULL!	有（现无）	2	1	2	0	1.13	83.2	4.38	61.35	49.3	45.95	55
2	贾文海	1	52	10.97	8.84177	有	5	177	92	29.37	136	91	37.4	18	14.7	34.8	95.5	5.39	1.92	3.75	0.83	10.97	62.6	5.12	425.8	2.26	1.35	108.01	6.03	2.93996	8.8	#NULL!	15.89	14.1	0.17	37.56	41.58	无	1	1	2	0	#NULL!	0	#NULL!	52.15	50.35	39.95	44.95
2	孟秀荣	2	51	16.07	10.2	有	5	176	80	25.83	130	90	44.2	11.7	10.1	14	70.9	5.1	1.93	3.59	0.98	16.07	51.8	6	204.9	2.2	1.09	106.73	3.58	2.55692	10.2	#NULL!	13.83	11.88	#NULL!	#NULL!	35.14	有	1	1	2	0	1.4	86.94	1.6	52.95	50.3	38.15	58.35
2	王林	1	60	9.63	7.5	有	5	172	72	24.34	156	78	#NULL!	0	#NULL!		#NULL!	4.38	0.87	2.64	1.28	9.63	78	4.8	326.2	0	#NULL!	93.27	#NULL!	#NULL!	7.5	#NULL!	6.11	9.13	0.22	58.21	27.26	增殖期	1	2	2	1	1.55	103.5	5.05	47.45	53.15	39.65	43.6
2	王瑞雪	1	67	5.63	7.7	有	6	172	75	25.35	133	88	44.6	12	22.6	18.8	55.9	4.6	0.81	2.92	1.23	5.63	94.5	5.5	282.9	2.31	0.81	71.51	#NULL!	#NULL!	7.7	#NULL!	17.14	11.12	0.18	19.98	58.63	无	2	1	2	2	1.17	91.43	2.74	54.5	58.6	46.05	54.55
2	史冬菊	2	66	9.06389	8.84177	有	6	150	60	26.67	122	81	#NULL!	0	#NULL!		#NULL!	0	#NULL!	#NULL!	#NULL!	9.06	#NULL!	0	#NULL!	0	#NULL!	#NULL!	#NULL!	#NULL!	8.8	#NULL!	22.7	16.3	0.64	74.88	27.12	无	1	1	2	0	#NULL!	0	#NULL!	61.3	53	43.15	55.55
2	李风芹	2	76	9.78	8.9	有	6	155	70	29.14	117	75	44.3	15.3	19.7	20	88.6	5.43	6.09	3.47	0.91	9.78	79.9	9.3	355	2.43	0.74	62	13.71	5.95928	8.9	#NULL!	12	15.9	0.31	34.88	49.44	无	2	2	2	1	1.42	101.5	2.32	62.75	56.45	46.6	47.6
2	夏秀会	2	62	9.06389	11.5	有	6	153	69	25.2	138	86	#NULL!	0	#NULL!		#NULL!	0	#NULL!	#NULL!	#NULL!	9.06	57	3.19	#NULL!	2.24	#NULL!	#NULL!	3.34	#NULL!	11.5	37.63	16.25	7.42	0.5	21.58	18.6	有	2	1	2	0	#NULL!	0	#NULL!	56.35	51.3	43.3	57.15
2	周跃琴	2	80	12.92	7.7	有	6	163	77	28.98	163	87	43.6	20.5	21.8	15.5	70.4	5.04	1.39	3.4	0.96	12.92	88.4	9.1	344.6	2.62	1.37	52.6	28.81	16.5433	7.7	#NULL!	14.05	13.6	0.2	35.83	18.7	无	1	2	2	0	1.73	100.9	1.94	55	48.5	47.5	51.15
2	郑斌	1	37	5.91	9.1	有	6	174	53	17.51	134	91	40.1	12.4	41.6	343.9	95.1	3.89	0.6	2.29	1.17	5.91	51.6	4.5	321.7	2.33	1.27	129.91	#NULL!	#NULL!	9.1	#NULL!	#NULL!	#NULL!	#NULL!	#NULL!	#NULL!	无	2	1	2	0	1.4	79.62	2.37	50.3	50.5	39.3	54.65
2	李保恒	1	55	6.25	8.7	有	7	101	178	31.88	133	84	39.82	3.1	7.4	15.9	80.4	5.49	1.77	3.51	1.25	6.25	75.9	5.79	397.12	2.34	1.49	97.69	14.24	3.95556	8.7	#NULL!	18.31	14.73	0.24	29.96	39.46	无	1	1	1	0	1.3	74.86	0.452	56.75	57.15	42.8	62.2
2	张志香	2	66	16.33	15	有	7	158	47.5	19.03	87	63	31.7	7.2	11.7	17.4	42.6	9	2.23	5.84	1.42	16.33	48.3	3.8	299.2	2.03	1.13	98.27	#NULL!	#NULL!	15	#NULL!	11.52	7.43	0.35	33.14	20.14	无	2	1	2	0	0.675	66.55	2.59	48.45	54.45	40.65	52.15
2	芦洪梅	2	32	8.29	12.1	有	7	165	68	24.98	123	82	38.66	19.9	21.3	21.6	63.1	5.6	5.73	3.21	0.94	8.29	45.9	2.68	389.8	2.25	1.17	126.89	2.07	0.76268	12.1	32.6	#NULL!	#NULL!	#NULL!	#NULL!	#NULL!	有	2	1	2	0	1.3	78.92	1.14	44.65	50.85	38.05	55.65
2	田立新	1	49	9.45	10.1	有	7	170	78	26.99	142	101	43.1	11.9	14.2	16.5	111.4	4.6	0.76	3.2	0.95	9.45	71.9	11.76	265.6	2.34	1.21	104.17	14.2	5.964	10.1	24.78	18.75	26.33	0.21	92.38	37.47	无	1	2	2	0	1.69	106.4	0.936	50.5	48.5	40	54.6
2	姚武华	1	56	9.13	8.7	有	8	#NULL!	75	24.49	135	96	43.1	28.5	17.6	22.1	93.4	4.77	1.99	3.33	0.85	9.13	65.5	4.9	247.7	2.28	1.15	103.06	7.35	2.98247	8.7	#NULL!	13.84	11.45	0.41	45.25	48.77	无	2	2	2	0	1.43	103.8	1.2	54.8	53.1	42.8	54.2
2	丁国造	1	67	10.5	10.2	无	8	170	80	27.68	143	77	46.3	21.3	18.3	30.6	111.2	5.14	1.69	3.73	0.99	10.5	83.3	6.5	315.9	2.35	1.05	83.37	14.29	6.66867	10.2	#NULL!	32.31	8.45	0.18	27.12	30.83	无	2	1	2	0	2.37	100.1	2.37	53.95	54.15	45.65	62.8
2	刘彦霞	2	34	11.81	8.84177	有	8	160	65	25.39	116	79	37.39	43.8	34.8	99.4	89.5	12.55	16.64	0.97	2.2	11.81	52.9	4.82	183.8	2.26	0.96	119.41	6.23	3.27006	8.8	#NULL!	13.32	5.68	#NULL!	17.4	22.84	无	1	1	1	0	0.827	63.3	1.78	56	56.7	47.05	58.6
2	耿本府	1	74	6.57	6.8	有	8	170	76	26.3	107	70	39.2	16.1	15.4	17.7	31.6	3.99	1.4	2.85	0.83	6.57	84.1	4.3	324	2.33	1.36	78.41	9.83	2.87036	6.8	#NULL!	11.46	10.24	0.22	32.14	31.37	无	2	2	2	0	1.24	86.57	1.34	53.8	54.7	42.4	52.85
2	李香瑞	2	65	11.59	11	有	8	165	62	22.77	141	66	40.7	13.5	14.5	17.1	77.2	7.68	2.43	5.25	1.06	11.59	46.2	3.2	148.9	2.32	1.08	100.42	2.88	1.48352	11	#NULL!	8.96	8.3	0.36	39.87	64.77	无	1	2	2	0	1.32	77.12	2.82	52.2	52.95	38.5	54.9
2	李进志	1	57	8.12	8.1	有	8	176	92	29.7	112	82	41.8	27.3	18.4	36.3	56.9	5.58	1.26	3.66	1.17	8.12	100.2	7.8	455.1	2.4	1.28	71.5	11.99	4.32706	8.1	#NULL!	#NULL!	#NULL!	#NULL!	#NULL!	#NULL!		2	1	2	0	1.38	103.9	1.51	46.35	48.75	40	57.05
2	李丰	1	48	13.65	9.9	有	8	160	69	26.95	140	86	42.2	20.6	26.9	28.8	64.5	6.5	1.87	1.13	4.42	13.65	77.2	4.7	330.7	2.39	1.18	101.9	#NULL!	#NULL!	9.9	#NULL!	13.66	9.88	0.11	24.39	22.81	有	1	1	2	0	1.76	92.84	2.32	46.95	48.1	45.25	46.4
2	刘宝玉	1	38	14.34	9.7	有	9	171	90	30.78	146	102	44.4	52	29.3	40.8	121.6	4.13	2.9	2.71	0.77	14.34	67.1	5.52	291.3	2.23	1.13	115.8	#NULL!	#NULL!	9.7	#NULL!	8.02	13.32	0.54	44.98	63.4	有	2	2	1	0	1.99	97.9	4.28	55.7	53.7	39	55.5
2	刘秀琴	2	69	7.46	10.8	有	9	158	55	22.03	140	67	40.5	21.9	21	13.4	96.1	3.56	1.05	2.31	1.15	7.46	72.5	5.5	321.4	2.29	1.38	73.24	#NULL!	#NULL!	10.8	37.42	19.37	18.68	0.43	41.31	51.67	有	2	2	2	0	1.56	96.81	1.78	54.65	48.65	44.5	58.7
2	严军	1	42	3.07	8.5	有	9	180	75	23.15	111	73	43.2	13.9	14.7	24.8	102.8	4.77	2.62	3.09	0.99	3.07	63.65	6.38	213.01	2.31	1.23	115.06	#NULL!	#NULL!	8.5	#NULL!	19.56	12.9	0.49	46.11	41.77	无	1	1	2	0	1.17	92.59	0.876	47.25	56.5	36.45	50.65
2	李同瑞	1	53	6.28	8.4	有	9	176	65	20.98	127	84	29.6	16.1	21.6	24.1	91.7	4.67	1.33	1.12	3.35	6.28	84.8	6.3	244.8	2.14	1.06	0	1.12	0.312604	8.4	20.76	15.31	14.39	0.33	52.06	30.9	有	2	1	2	0	1.38	81.38	2.53	46	51.5	38.5	50
2	王存生	1	62	8.15	9.7	有	9	178	55	17.36	104	59	36.7	23.9	25.5	13.1	102.3	4.38	1.06	1.17	3.14	8.15	53.3	6.4	234.9	2.26	1.04	107.51	1.69	0.612156	9.7	34.21	15.12	14.24	0.35	69.24	44.48	无	1	2	2	0	1.63	106.5	4.6	40.6	45.15	31.25	42.4
2	胡树军	1	73	7.41	7.6	有	10	170	73	25.26	124	73	31.5	87.6	65.5	70.3	92.5	3.22	0.78	0.67	2.17	7.41	212.8	12.4	488.5	2.14	0.96	25.7	#NULL!	#NULL!	7.6	#NULL!	14.38	26.86	0.66	69.83	39.89	无	2	1	2	0	1.38	95.09	1.02	51.1	51.75	44.55	57
2	贾彦芳	2	59	7.54	9.6	有	10	158	56	22.43	154	81	41.3	14	19.1	18.5	76.6	3.81	1.45	2.29	1.11	7.54	64.55	5.22	418.7	2.36	1.44	90.42	#NULL!	#NULL!	9.6	#NULL!	21.52	15.51	0.49	39.9	46.24	无	1	1	2	1	1.81	112.3	1.97	64.05	55.85	45.25	58.05
2	李立丹	2	79	7.61	6.7	有	10	155	57	23.73	138	74	43.9	17.9	25.2	27.8	65.7	9.18	1.8	6.37	1.37	7.61	80.2	6.2	526.9	2.39	1.21	60.39	10.11	3.41943	6.7	20.68	15.47	18.62	0.41	49.53	32.78	无	2	2	2	0	1.5	96.43	4.34	58.9	61.8	50.8	55.7
2	王彦蒲	2	64	7.16	7.6	有	10	164	91	33.83	135	88	38.7	40.4	24.9	40	98.8	5.85	1.23	3.98	1.51	7.16	61.6	6.6	255.1	2.22	1.51	92.01	13.3	4.23236	7.6	#NULL!	14.64	25.55	0.71	76.91	34.7	无	2	2	2	0	1.64	104.8	3.43	53.4	57.05	44.85	55.95
2	栗伟	1	56	6.95	7.3	有	10	175	76	24.82	137	83	39.3	15.8	14.7	63.5	74.9	5.58	1.71	1.05	4.08	6.95	101.6	6.7	379.2	2.34	1.18	70.84	8.78	2.71204	7.3	17.56	9.86	21.42	0.39	65.73	62.64	非增殖期	1	1	2	0	1.86	112.8	1.19	58.05	53.8	42.2	54.5
2	张明山	1	69	5.69	12.3	有	10	170	60	20.76	109	72	29.7	8.2	12.6	12.3	133.2	3.61	1.01	2.3	0.71	5.69	75.3	7	171	2.2	1.21	88.83	#NULL!	#NULL!	12.3	#NULL!	10.56	4.69	0.51	31.22	24.55	无	2	1	2	0	1.35	96.01	2.17	56.55	53.95	38.4	59.15
2	贾桂英	2	75	10.89	8.3	有	10	160	70	27.34	120	63	44.5	8.3	15.9	20.6	58.6	6.57	1.86	1.53	4.29	10.89	79.3	6.2	204.4	2.34	1.27	63.01	11.83	5.72572	8.3	26.82	22.8	7.67	0.27	19.12	39.47	非增殖期	2	1	2	0	1.3	98.52	3.1	50.5	47.5	39	54.9
2	姜兴起	1	68	6.26	7.2	有	10	170	90	31.14	155	71	38.1	25.3	20.7	29.3	60.6	4.7	1.76	3.56	0.8	6.26	93.5	7.2	262.7	2.22	1.14	71.95	12.17	3.38596	7.2	#NULL!	22.85	14.32	0.52	47.63	53	有	2	2	1	0	1.03	72.33	1.14	53.55	51.95	40.55	53.7
2	罗习书	2	49	9.22	12.8	有	10	160	75	29.3	148	100	38	23.5	41.5	36.2	86	4.53	6.49	2.62	0.97	9.22	73.4	10.1	399.9	2.32	1.66	83.04	2.18	#NULL!	12.8	#NULL!	16.33	9.95	#NULL!	#NULL!	31.89	有	1	1	2	0	1.53	102	2.14	54.75	46.35	44.15	61.2
2	卜玉祥	2	74	5.98	7.2	有	10	156	60	28.76	180	81	33	37.3	26.2	21.2	87.8	3.67	0.87	2.06	1.15	5.98	171.5	11.4	359.6	2.11	1.64	24.97	#NULL!	#NULL!	7.2	#NULL!	7.55	47.41	1.41	171	38.9	非增殖期	2	1	2	0	1.31	86.58	1.45	56.3	57.05	39.6	47.4
2	刘彩丽	2	66	9.46	9.5	有	10	163	67	25.22	131	75	38.6	15.1	13.7	19.3	82.8	4.25	0.93	2.77	1.07	9.46	68.2	3.6	198	2.3	1.2	80.51	8.21	3.45185	9.5	#NULL!	5.53	11.4	0.4	40.33	27.38	有	1	1	2	0	1.4	90.74	3.86	58.85	48.25	41.75	50.6
2	伊桐生	1	80	5.86	6.4	有	10	160	55	21.48	114	66	37.6	5.2	11.9	11.1	40.2	2.5	0.97	1.36	0.9	5.86	75.4	5.1	501.9	2.25	1	63.34	#NULL!	#NULL!	6.4	17.93	10.7	21.27	0.86	58.96	29.23	无	2	2	2	1	1.12	114	1.55	43.2	41.3	36.7	50.15
2	武成梅	2	57	11.49	10.4	有	10	158	75	30.04	173	96	32	8.9	12.5	11.6	60	4.06	0.79	2.72	0.75	11.49	70.3	3.6	133.8	2.23	1.31	82.66	3.31	1.69031	10.4	#NULL!	11.96	11.37	0.31	32.07	26.48	有	1	1	2	0	1.41	103.2	4.32	46.4	55.2	37	48.55
2	贾云改	2	66	7.91	8.9	有	10	158	58	23.23	123	76	40.7	9.4	13	11.8	93.6	4.32	1.14	2.86	1.02	7.91	179.5	14.1	338.4	2.46	1.21	25	6.81	2.39409	8.9	38.08	17.02	30.84	0.9	84.54	26.1	无	2	1	2	0	1.03	77.63	2.17	48	45.35	38.9	46.15
2	任德忠	1	55	8.07	12.6	有	10	167	60	21.51	153	89	39.2	13.1	19.8	23.4	69.6	4.4	0.97	2.92	0.99	8.07	67.18	5.97	293.84	2.33	1.35	102.72	#NULL!	#NULL!	12.6	#NULL!	12.06	11.25	0.33	39.13	27.09	有	2	1	2	1	1.62	102.2	2.05	49.35	52.5	#NULL!	42.8
2	徐承红	1	64	7.02	10.3	无	10	170	60	20.76	112	66	37.3	21.8	22.8	118.3	124.2	3.77	1.38	2.33	0.95	7.02	130.5	19.3	630.1	2.26	1.34	49.45	#NULL!	#NULL!	10.3	#NULL!	6.61	16.67	0.36	81.24	84.53	非增值期	2	1	2	2	1.32	82.62	1.98	42.25	46.15	35.6	#NULL!
2	董龙宝	1	57	4.61	6.5	有	11	181	79	24.11	126	77	39.8	15.6	16.4	12.1	100.7	3.33	0.53	2.31	0.86	4.61	58.9	4.3	271	2.17	1.33	106.92	#NULL!	#NULL!	6.5	#NULL!	13.7	26.88	0.95	108.3	69.54	无	2	2	2	0	1.83	106.1	0.806	53.05	53.15	40.25	55.9
2	李金需	2	60	7.03	10.7	有	11	156	65	26.71	127	65	43.1	18.5	19.9	30.5	95.8	6.28	0.98	3.86	1.54	7.03	579	5.6	254.6	2.36	1.29	96.57	5.26	1.64346	10.7	#NULL!	13.17	19.08	0.39	61.14	46.01	非增值期	1	1	2	0	1.32	74.06	3.53	44.55	48.15	43.15	47.2
2	卢新瑞	2	72	10.83	10.9	有	12	158	60	24.03	165	84	39.9	10	15	18.7	57.2	3.89	1.14	1.19	2.34	10.83	62.3	3.8	147.8	2.24	1.11	86.14	5.73	2.75804	10.9	#NULL!	15	16.13	0.41	42.07	41.32	非增殖期	2	1	2	1	1.42	88.04	2.47	52.2	50.4	44.2	54.9
2	张雪芬	2	63	8.31	8.2	有	12	164	75	27.89	131	81	44.8	18.9	22.3	17.1	69.3	7.5	1.19	5.79	1.36	8.31	95.3	6.7	391.2	2.49	1.56	54.92	6.8	2.51147	8.2	#NULL!	11.65	18.84	0.32	58.71	51.91	无	1	1	2	0	1.3	98.27	7.16	58.5	54.5	46.5	57.9
2	胡乃丽	2	55	6.69	9.1	有	12	169	74	25.91	136	80	40.1	13.2	15	14.9	68	4.45	1.37	2.82	0.88	6.69	43.8	5	444.2	2.26	1.37	109.67	8.45	2.51247	9.1	25.18	25.36	14.32	0.35	40.25	49.27	有	1	1	2	0	1.39	96.67	2.48	55.45	52.75	39.95	60.6
2	万方	2	35	8.15	9.7	有	12	165	55	20.2	124	82	37.3	9.4	18.7	48.7	46.7	6.43	11.22	2.88	0.25	8.15	53.1	2.8	262	2.04	1.08	118.43	9.81	3.5534	9.7	#NULL!	6.34	5.61	0.15	19.35	56.29	有	1	2	2	0	1.31	89.98	4.02	48.2	54.05	37.2	40.9
2	温文法	1	62	4.63	6.1	有	12	170	64	22.15	96	58	39.3	4.4	19.2	13.8	61.9	3.65	2.01	0.86	2.23	4.63	81.8	4.9	308.1	2.26	1.23	88.22	3.34	0.687298	6.1	#NULL!	24.4	14.23	0.65	40.6	32.25	无	2	2	2	1	1.39	102	2.49	48.45	45.7	36.6	40.5
2	陈三顺	1	77	5.52	7.4	有	13	165	71	26.08	140	70	41.4	17.1	24.9	20.2	65.6	4.58	1.43	1.35	2.66	5.52	67.2	4.6	207.3	2.49	1.27	87.98	#NULL!	#NULL!	7.4	#NULL!	12.13	18.03	0.61	49.78	41.82	无	2	2	2	1	1.72	99.1	3.3	54.5	49.7	43.2	56.8
2	李满红	1	67	8.75	8.5	有	13	173	80	26.73	131	83	40.8	13.7	14.3	24	78.7	3.98	2.7	2.51	0.88	8.75	71.88	5.64	295.01	2.19	1.17	91.82	3.9	1.51667	8.5	#NULL!	22.65	12.88	0.21	33.74	24.34	非增值性	2	1	2	0	1.54	86.67	2.84	52.35	51.5	41.45	43.4
2	冯志新	1	52	9.88	9.1	有	13	173	70	23.39	126	82	37.1	63.7	97.7	1193.3	26.8	5.16	1.32	1.17	3.7	9.88	55.4	2.9	270.8	2.2	0.77	113.55	3.96	1.73888	9.1	24.27	12.76	8.58	0.43	97.99	27.73	非增殖期	2	1	2	0	1.07	83.92	1.58	40.3	42.6	36.6	43.3
2	阎上游	1	59	6.11	7.4	有	14	178	107	33.77	129	74	41.2	15	17.7	32.7	66.2	4.03	8.02	0.83	2.2	6.11	#NULL!	3.9	92.68	2.47	1.38	1.5	#NULL!	#NULL!	7.4	#NULL!	20.36	9.23	0.11	27.89	22.49	无	1	1	1	1	1.5	92.68	1.5	59.05	55.15	46.35	58
2	闫向上	1	54	12.15	8.9	有	14	174	109	36	158	96	44.75	52.6	39.1	71.7	80.1	6.36	3.4	4.19	1.33	12.15	69.4	5.78	307.6	2.45	1.34	102.07	19.77	10.6758	8.9	24.5	20.14	9.91	0.18	32.05	20.61	无	1	2	1	0	1.16	68.1	1.91	56.2	54.75	46.05	61.95
2	陆凤英	2	68	7.01	10.6	有	15	162	81	30.86	129	69	38.3	12.1	14.1	18.2	60.2	5.2	3.25	0.88	3.58	7.01	61.3	5.5	283	2.28	1.35	89.59	11.7	3.6452	10.6	24.58	22.64	16.29	0.23	46.7	24.17	无	1	1	1	0	1.53	91.48	1.76	56	52.5	45	52.15
2	耿文胜	1	69	7.52	8.7	有	15	174	90	29.73	155	97	42	23.2	21.3	30.4	68.2	2.96	1.36	1.74	0.8	7.52	77.1	6.4	254	2.26	1.49	87.97	#NULL!	#NULL!	8.7	#NULL!	18.63	11.36	0.29	41.71	31.71	无	1	2	1	0	1.83	88.68	1.8	52.8	56.9	42.05	55.2
2	赵聪明	1	69	10.98	10.3	有	15	178	92	29.04	155	87	38.3	11.1	12.5	14.4	71.6	4.05	1.32	0.94	3.03	10.98	77.1	6.1	230.4	2.26	1.08	87.96	#NULL!	#NULL!	10.3	#NULL!	#NULL!	#NULL!	#NULL!	#NULL!	#NULL!	非增殖期	1	1	2	1	#NULL!	0	#NULL!	51.65	51.2	37.35	47.5
2	涂桂英	2	61	7.73	7.7	有	15	150	60	26.67	163	92	44.59	20.1	16.3	21.4	64.4	5.38	1.06	3.29	1.56	7.73	59.2	5.61	197.5	2.33	1.32	95.19	10.45	3.59016	7.7	22.68	14.38	10.37	0.22	39.59	51.33	无	1	2	2	0	1.38	93.89	3.47	65.4	55.5	47.4	55.7
2	倪广义	1	71	9.37	7.6	有	15	167	78	27.64	152	78	37.7	14.1	20.5	35.5	81.7	2.73	1.08	1.6	0.84	9.37	94.4	7.04	335.7	2.24	0.97	69.68	#NULL!	#NULL!	7.6	#NULL!	20.61	14.26	0.3	28.7	51	无	1	2	2	0	1.57	78.06	5.74	59.65	53.25	41.05	56.7
2	周年锁	1	61	7.87	7.5	有	15	174	82	27.08	130	71	38.54	16.8	17.4	36.9	69	4.55	1.13	2.94	0.8	7.87	75.3	5.17	230.3	2.31	1.37	93.97	#NULL!	#NULL!	7.5	#NULL!	25.36	7.55	0.22	41.31	23	有	1	1	2	0	1.41	102.2	1.25	52.4	51.45	38.4	49.15
2	刘占京	1	66	11.63	8.5	有	15	170	67	23.18	146	89	40.5	28.5	20.4	33	108	6.05	1.18	4.07	1	11.63	70.8	8.1	227	2.26	1.04	93.05	#NULL!	#NULL!	8.5	#NULL!	8.94	8.13	0.24	28.92	52.06	无	2	1	2	0	1.44	98.76	2.25	58.8	57.05	40.45	57.8
2	申胜芹	2	67	10.86	9.6	有	15	160	68	26.56	167	103	38.2	4.6	12.8	13.8	87.9	3.88	3.03	0.81	2.47	10.86	79.6	5.3	448.3	2.28	1.08	#NULL!	#NULL!	#NULL!	9.6	#NULL!	10.72	17.35	0.74	41.57	50.62	非增殖期	1	2	2	0	1.22	106.4	1.08	53.5	49	40	54.5
2	高梅庭	2	70	9.11	10.3	有	15	160	70	27.34	142	80	37.8	36.4	29.5	25.9	90.5	3.87	1.97	2.73	0.83	9.11	62.8	4.1	357.6	2.1	0.97	86.52	14.23	#NULL!	10.3	25.52	12.38	22.66	#NULL!	#NULL!	59.75	无	2	1	2	1	1.29	88.28	3.16	58.65	51.4	43.15	56.2
2	赵运其	1	79	8.19	8	有	15	175	85	27.76	135	78	39.1	19.9	11	28.2	69	4.52	1.52	3.11	0.69	8.19	103	7.3	293.1	2.29	1.37	58.44	#NULL!	#NULL!	8	#NULL!	20.13	11.57	0.22	43.73	34.04	无	1	2	2	0	1.3	99.97	1.85	49	53	44	51.05
2	马国才	1	78	5.97	7.9	有	15	#NULL!	0	#NULL!	146	74	37.7	19.4	19.1	13.3	87.9	2.62	0.71	1.69	0.78	5.97	112.5	9	298.6	2.24	1.01	53.61	4.48	1.18869	7.9	40.73	6.54	26.49	0.69	81.53	56.01	有	2	1	2	0	1.3	63.1	1.84	49	43	#NULL!	40.9
2	汤五群	2	74	9.91	10.3	无	16	153	48	20.5	128	80	38.3	10.9	15.1	18.9	60.8	4.44	0.87	0.15	2	9.91	51.3	4.81	256.2	2.41	1.12	91.1	#NULL!	#NULL!	10.3	#NULL!	13.91	8.43	0.29	30.3	67.27	有	2	1	2	1	0.816	42.94	4.91	53.15	50.9	46.2	53.75
2	高伟	1	38	7.37	7.5	有	16	170	80	27.68	120	83	45.3	20.1	19.3	41.9	85	5.28	1.37	3.27	1.26	7.37	74.9	5.9	350.8	2.38	1.07	110.68	7.09	2.32237	7.5	18.94	12.32	15.99	0.45	72.74	63.17	非增殖期	1	2	2	0	2	115.5	2.63	53.1	53.45	46.15	51.8
2	张文革	1	52	19.06	11.4	有	16	175	76	24.82	157	103	42.7	21.6	18.9	36.6	112.8	6.13	1.62	3.78	1.32	19.06	73.4	5.4	303.2	2.31	1	101.15	11.07	9.37752	11.4	#NULL!	11.67	8.71	0.34	27.22	56.02	非增值期	1	1	2	0	2.02	103.5	0.987	52.75	49.15	43.45	53.25
2	高生元	1	68	4.91	7.6	有	16	163	67	25.22	#NULL!	0	39.2	24.6	22	16.5	56.4	2.4	0.92	1.62	0.71	4.91	93.2	7.3	297.2	2.19	1.31	72.27	9.47	2.06656	7.6	43.67	16.96	14.73	0.55	31.24	35.42	无	1	2	2	1	1.5	100.5	1.81	54.5	50.35	40	55.25
2	袁朝辉	1	49	14.96	12.4	有	16	181	90	27.47	120	86	37.93	13.4	12	16.8	65.4	5.22	1.8	3.46	1.02	14.96	70.2	7.26	370.68	2.15	1.34	105.22	5.54	#NULL!	12.4	#NULL!	15.97	9.48	0.34	34.84	32.62	有	1	1	2	0	1.21	77.12	1.87	51.15	55.05	39.85	54.9
2	李双所	1	59	8.3	7.6	有	18	175	74	24.16	139	75	41.8	17.7	16.8	13.2	99	2.75	1.87	1.9	0.75	8.3	78.5	4.2	340.8	2.29	0.93	93.67	2.85	1.05133	7.6	#NULL!	#NULL!	#NULL!	#NULL!	#NULL!	#NULL!	增殖期	2	1	2	0	1.55	69.27	2.02	53	53.05	39.25	50.2
2	郝福珍	2	66	14.17	9.9	有	18	157	45	25.56	106	63	39.8	37.8	34.2	10	96.9	6.28	1.54	3.7	1.68	14.17	64.4	6.4	209.5	2.48	0.94	86.29	#NULL!	#NULL!	9.9	#NULL!	9.43	12.13	0.36	36.19	71.14	无	2	2	2	0	1.01	89.43	2.12	54.5	54.5	41	47.55
2	吴焕之	1	71	6.73	11	有	18	168	64	22.68	96	45	28.1	8.2	12.8	27.6	75.3	5.53	0.9	3.53	1.14	6.73	121.3	10.9	361.7	2.01	1.12	51.43	#NULL!	#NULL!	11	#NULL!	3.83	11.84	0.4	47.09	36.55	有	2	1	2	0	1.08	106.6	0.736	44.6	43	34.5	#NULL!
2	王淑敏	2	66	27.06	12	有	19	155	93	38.71	147	86	36.6	21.6	20	26.7	81.8	5.44	1.24	1.25	3.63	27.06	128	12.1	563.7	2.34	1.34	37.62	28.71	34.5286	12	40.11	15.28	12.1	0.33	28.92	53.43	无	2	1	1	1	1.37	92.62	1.86	57	56.5	46	52.4
2	顾成学	1	67	16.85	9.9	无	20	170	64	22.15	105	55	#NULL!	0	#NULL!		#NULL!	0	#NULL!	#NULL!	#NULL!	16.85	#NULL!	0	#NULL!	0	#NULL!	#NULL!	13.29	9.95273	9.9	#NULL!	30.16	6.34	0.11	16.8	28.43	有	2	1	2	0	1.09	85.92	1.96	47.2	46.65	38.2	52.15
2	常文德	1	74	6.71	7.2	有	20	178	78	24.62	170	74	34.1	17.9	18.6	24.7	99.2	4.16	0.56	2.78	0.89	6.71	129.6	13	541.8	2.26	1.22	46.5	5.43	1.61935	7.2	21.76	30.49	13.29	0.17	0.17	23.84	无	2	2	2	0	1.48	90.46	11.48	52.65	50.2	40.4	48.65
2	王振英	2	80	21.22	16	有	20	160	49	19.14	122	71	34.5	17.1	19.6	19.2	97.2	5.23	1.52	1.09	3.8	21.22	81.4	7.1	199	2.42	1.08	58.97	#NULL!	#NULL!	16	#NULL!	#NULL!	#NULL!	#NULL!	#NULL!	#NULL!	非增殖期	2	1	2	0	1.45	106.8	3.66	45.95	49.3	39.7	0
2	陈秀兰	2	69	14.64	8.2	有	20	162	67	25.53	160	78	40.4	24.9	35.8	42.9	88.7	5.48	5.61	0.69	3.07	14.64	123.6	9.1	296.1	2.47	1.33	38.43	28.73	18.6937	8.2	#NULL!	10.62	13.76	0.25	40.52	28.88	有	2	1	1	1	1.57	153	0.553	54.1	53.2	43.35	57.75
2	赵桂更	2	79	7.97	7.2	有	20	158	48	19.23	145	67	38.9	8.6	18.9	15.3	73	6.78	0.65	2.06	4.13	7.97	65	4.5	319.5	2.32	1.23	77.91	#NULL!	#NULL!	7.2	24.16	12.42	26.26	0.52	63.65	68.55	无	1	2	2	2	1.07	75.89	2.97	52.15	57.35	50.15	56.55
2	闫玉卓	2	58	4.59	7.4	有	20	158	67	26.84	140	83	43.2	68.9	61.2	27.6	51.4	5.51	1.24	3.51	1.66	4.59	66	6.1	337.3	2.29	1.45	88.71	#NULL!	#NULL!	7.4	#NULL!	28.24	17.77	0.54	50	32.03	无	2	1	2	0	1.87	79.53	3.02	64.65	64.7	51.55	63.5
2	刘仕忠	1	72	9.79	9	有	20	170	74	25.61	126	68	40.2	11	20.6	17	66.3	4.77	2.11	3.09	0.88	9.79	73.8	5.2	257.1	2.19	1.04	87.72	4.81	2.09288	9	27.13	19.8	14.7	0.36	46.64	40.37	有	2	1	2	0	0.931	66.35	4.62	52.6	52.65	37.65	48.25
2	魏国振	1	78	7.85	8.8	有	20	172	65	21.97	150	83	37.5	17.4	27.3	33.7	112.8	3.13	0.55	1.95	0.92	7.85	58.4	2.9	206.2	2.08	1.38	92.57	2.05	0.715222	8.8	31.17	19.23	15.79	0.51	62.44	36.75	无	2	2	2	1	1.43	113.4	1.43	50.75	51	46.15	50.85
2	李建民	1	55	3.39	8.2	有	20	168	70	24.8	138	83	38.2	11.8	139	15.5	66.4	4.65	1.3	3.31	0.95	3.39	93.7	7.63	327.7	2.24	1.34	78.63	#NULL!	#NULL!	8.2	23.16	12.64	12.26	0.65	36.08	103.1	未查	2	1	2	0	1.33	72.05	0.707	53.95	58.4	38.05	52.95
2	吴义文	1	62	7.87	6.1	有	20	180	75	23.15	166	91	44.7	12.6	19.9	14.3	105.6	3.5	2.53	2.16	0.92	7.87	85.9	6.4	310	2.24	0.93	83.16	#NULL!	#NULL!	6.1	#NULL!	12.03	14.57	0.3	33.14	71.77	有	2	1	2	0	1.69	79.52	2.5	59.25	53.9	43.5	50.8
2	刘国际	1	59	5.27	8.4	有	20	70	70	26.67	#NULL!	79	42.16	11.5	16	19.3	111.2	6.25	1.25	4.63	0.97	5.27	226	13.81	404	2.26	1.58	26.37	#NULL!	#NULL!	8.4	23.08	8.18	31.53	0.25	84.92	127.3	有	2	1	2	2	1.35	74.38	4.86	52.5	52	47	51.55
2	王金华	2	71	10.09	8.8	有	20	162	70	26.67	155	81	41.7	8.6	12.2	12.1	75.6	4.78	4.47	0.95	3.37	10.09	68.1	6.5	322.5	2.34	1.2	77.93	24.78	11.1125	8.8	24.42	12.34	18.04	0.46	37.29	32.03	无	1	1	2	0	1.39	74.95	3.16	50.5	48.95	40.3	58.75
2	沈志英	2	68	8.85	10.8	有	20	159	77	30.46	130	72	44.2	14.4	19.2	19.4	85.7	4.75	1.75	3.22	1.1	8.85	82.2	6.8	427.8	2.4	1.2	63.37	98.44	38.7197	10.8	32.14	14.97	11.52	0.16	33.57	35.12	有	1	1	2	1	1.39	92.99	8.17	52	51.95	40.05	51.6
2	张友生	1	73	5.23	10	有	20	168	62	21.97	118	65	41.8	70.2	36.9	53.2	95.4	4.26	1.4	2.82	1.12	5.23	71.2	4.4	321.7	2.31	1.37	88.38	#NULL!	#NULL!	10	#NULL!	17.8	7.87	0.3	21.45	35.67	无	2	1	2	0	1.31	82.03	1.95	48.55	53.4	35.65	44.35
2	付玉伶	2	55	4.33	11.6	有	20	170	70	24.22	98	63	37.39	33.6	21.1	18.5	97.7	4.68	1.92	3.14	0.97	4.33	70.2	4.79	284.33	2.25	1.68	84.02	4.06	0.781324	11.6	#NULL!	11.06	20.86	0.41	69.18	28.38	有	1	1	2	1	0.795	83.69	2.26	53	55	41.5	56.35
2	张殿宝	1	69	17.4	10.1	有	20	163	68	25.59	107	55	40.4	13.1	12.1	10.3	99.6	4.5	0.93	0.9	3.33	17.4	68.1	6.8	173.4	1.28	0.84	92.58	#NULL!	#NULL!	10.1	#NULL!	14.72	12.36	0.43	28.66	25.95	有	2	1	2	0	1.57	100.7	1.48	53.5	47.5	36.5	54.35
2	成保银	1	54	7	10	有	20	172	78	23.37	116	65	31.4	17.2	16.8	22.2	60	3.82	0.71	2.69	0.84	7	89	4.2	166	2.14	1.18	84.25	4.11	1.27867	10	#NULL!	16.64	7.41	0.19	27.4	12.31	有	2	1	2	0	1.39	99.63	1	53.5	55.5	35.5	50
2	孙素果	2	63	2.93	9.6	有	20	155	0	#NULL!	178	85	37.8	9.1	13.9	11.8	95.2	6.33	0.9	3.98	1.24	2.93	81.5	6	238.9	2.28	1.22	66.32	#NULL!	#NULL!	9.6	#NULL!	9.01	27.25	0.78	75.27	58.93	无	2	1	2	0	1.18	64.39	1.03	48.45	52.7	33.05	#NULL!
2	赵世亮	1	46	18.96	11.4	有	20	175	80	26.12	121	71	44.2	10.1	11.5	13.5	112.1	4.8	2.96	3.05	0.88	18.96	89.5	8.4	409.1	2.33	0.95	88.54	12.07	10.171	11.4	#NULL!	17.99	17.39	0.27	32.63	30.5	非增值期	1	1	2	0	1.32	106.3	1.15	46.5	48.5	42	53
2	盖冰卡	1	62	17.59	10.8	有	20	170	75	25.95	118	78	48.9	20.8	18	31.6	92.1	6.65	2.12	4.89	0.96	17.59	79.3	7.2	324.2	2.49	1.36	91.32	#NULL!	#NULL!	10.8	#NULL!	15.86	7.49	0.27	24.81	43.13	有	1	1	2	1	1.42	116.3	1.12	45.7	43.4	38.2	41
2	刘圣分	2	78	15.01	11.2	有	21	163	63	23.71	119	68	38.8	8	11.8	11.8	51.6	3.93	0.92	2.64	0.89	15.01	74.5	6.1	179.6	2.15	1.09	66.57	3.64	2.42828	11.2	40.17	13.72	6.67	0.24	24.45	47.7	有	2	1	2	0	0.964	92.16	0.936	52	54.5	40.25	49.25
2	陈振清	1	52	13.63	8.5	有	22	165	80	29.38	177	99	46.78	11.3	21	183.1	56.9	4.02	1.52	2.46	1.25	13.63	68	5.4	298.2	2.43	0.82	104.38	17.71	10.7283	8.5	24.92	28.06	6.38	0.07	17.66	19.92	无	1	1	1	1	1.57	109.2	1.37	49.4	49.1	36.7	52.15
2	李建蓬	1	49	12.26	9.3	有	22	172	95	32.11	150	83	42	8.7	21.5	32.2	85.4	4.81	1.36	0.98	3.4	12.26	82.2	8.1	318.7	2.28	0.93	96.08	5.59	3.04593	9.3	5.67	23.46	8.96	0.27	25.44	52.07	非增殖期	1	1	2	0	1.85	93.57	3.56	46.5	46.1	38.9	#NULL!
2	张兰芝	2	65	10.93	8.3	有	23	160	70	27.34	155	74	37.3	37.9	33.2	112.4	195.2	3.39	1.58	1.99	0.99	10.93	71.5	6.17	309.99	2.17	1.06	76.6	#NULL!	#NULL!	8.3	#NULL!	12.28	13.18	0.35	0.35	40	有	2	1	2	0	2.5	158.3	2.63	55.7	54.45	43.5	51.85
2	陆群山	1	75	10.09	8.6	有	23	#NULL!	80	25.25	166	86	40.1	14.8	13	52.1	53.4	2.37	1.26	1.43	0.65	10.09	82.8	4.5	357.5	2.21	1.29	79.34	60.77	#NULL!	8.6	21.56	33.41	13.71	#NULL!	#NULL!	36.34	无	2	1	2	1	1.36	75.96	1.77	53.45	52.3	36.1	51.55
2	杨志广	1	56	11.36	8.4	有	23	178	80	25.25	143	77	38.6	14.8	16.3	16.3	79.8	3.62	1.06	2.34	0.87	11.36	87.3	6.4	393.2	2.16	0.78	85.04	3.61	1.82265	8.4	#NULL!	15.36	10.99	0.18	37.34	24.74	非增值期	1	2	2	0	1.45	87.75	2.83	45.5	47.75	34.65	53.4
2	刘聚海	1	68	12.66	8.2	有	24	170	95	32.87	189	90	41.3	14.2	19.1	15.4	75.6	6.15	5.72	3.64	0.97	12.66	99.3	6.5	339.9	2.33	0.88	66.9	30.06	16.9138	8.2	#NULL!	22.24	8.73	0.11	20.21	37.1	无	1	1	1	1	1.44	94.38	1.48	52.8	53.2	44.15	49.8
2	孟献文	1	64	5.9	6.7	有	25	170	60	27.68	144	79	42.2	18.9	24.8	14.8	68.6	5.76	1.58	3.76	1.19	5.9	92.7	4.8	365.5	2.41	1.07	74.76	5.49	1.4396	6.7	#NULL!	13.85	15.48	0.42	40.75	57.07	无	1	1	2	0	1.7	84.86	2.53	53.25	58.9	48.4	54.8
2	张连海	1	54	10.41	7.6	有	25	176	80	25.83	121	70	41.43	26.7	22.1	32.3	82.8	4.11	1.69	2.79	0.74	10.41	73.1	6.57	369.26	2.27	1.13	99.91	#NULL!	#NULL!	7.6	#NULL!	16.39	18.68	0.36	44.69	40.79	无	1	1	2	0	1.34	74.72	1.84	44.5	51	38.5	#NULL!
2	袁占强	1	60	13.08	12.2	有	27	172	87	29.41	135	74	#NULL!	0	#NULL!		#NULL!	6.6	2.08	#NULL!	#NULL!	13.08	#NULL!	0	#NULL!	#NULL!	#NULL!	#NULL!	#NULL!	#NULL!	12.2	#NULL!	13.91	5.19	0.21	12.84	38.59	无	1	1	2	0	1.05	0	#NULL!	43.4	49.15	39.95	47.2
2	魏建华	1	65	9.92	11	有	0.6	170	70	24.22	111	87	36.9	17.5	18.4	21	86.9	4.95	1.7	0.83	3.68	9.92	86.5	8.8	417.7	2.21	1	80.7	2.34	1.03168	11	41.68	13.77	5.27	0.4	19.96	32.06	无	1	1	2	0	0.85	87.06	0.335	54.6	55.05	43.9	61.8
2	李春英	2	66	12.01	11.9	有	0.6	150	74	32.89	139	111	30.06	8.7	11.3	17.2	109.7	7.03	1.33	4.21	1.7	12.01	49	4.05	208.9	2.34	1.21	97.81	4.97	2.65288	11.9	29.08	11.9	14.72	0.36	42.11	64.51	无	2	1	2	0	1.29	96.66	2.75	53.6	55.1	43.5	58.3
2	杜永春	1	73	7.17	6.7	有	0.9	175	66	21.55	121	71	35.6	17.3	17.7	47.2	89.6	3.62	0.82	2.56	0.74	7.17	89	6.7	308.1	2.16	1.16	73.73	4.55	1.44993	6.7	#NULL!	18.85	13.74	0.42	38.76	29.23	有	2	2	2	0	1.31	90.36	2.56	52.95	51.95	43.6	47.4
2	郝建民	1	62	10.76	11.4	有	1	173	82	27.4	151	78	38.9	17	20.9	11.6	96.9	3.67	0.5	2.16	1.13	10.76	70.2	6.5	275.9	2.24	1.04	96.04	#NULL!	#NULL!	11.4	#NULL!	#NULL!	#NULL!	#NULL!	#NULL!	#NULL!	无	1	1	2	0	1.44	78.82	1.11	52.85	52.4	43.5	52.6
2	张普	1	48	9.88	8.3	有	1	178	80	25.25	175	101	40	274.6	146.3	242.7	176.2	4.88	0.88	3	1.32	9.88	55.8	4.5	207.4	2.29	0.96	116.45	7.96	3.49532	8.3	24.46	15.83	15.25	0.69	84.81	42.59	无	2	2	2	0	1.95	76.58	2.07	53.9	53.8	44.1	54.5
2	王玉琨	1	50	12.36	13.2	有	1	174	85	28.08	113	82	42.1	57.8	42.3	39.1	86.8	5.65	2.97	3.9	0.99	12.36	108.4	8.5	373.5	2.3	1.38	68.29	#NULL!	#NULL!	13.2	#NULL!	21.7	12.05	0.47	55.59	33.55	无	2	1	1	0	0.757	47.83	7.44	54.65	51.95	43.15	55.6
2	白振宇	1	38	13.37	10	有	1	180	92	28.4	130	95	37.1	32.4	13.5	89.4	78.6	4.55	5.72	2.97	0.75	13.37	88.8	6	580.4	1.94	0.84	94.55	5.8	3.44649	10	#NULL!	6.41	5.28	0.6	25.62	31.45	有	1	1	2	0	0.57	66.62	1.41	53.35	53.5	43.75	48.6
2	朱国华	1	45	6.75	7	有	2	182	95	28.68	136	94	42.84	68.6	28.5	90.8	74.8	3.12	0.95	1.88	0.88	6.75	62.4	6.3	189.4	2.24	1.46	113.58	6.81	2.043	7	18.4	16.91	14.29	0.13	42.28	29.36	有 非增殖期	2	2	1	0	1.97	62.36	2.73	57.75	58.75	48.9	57.6
2	张彦敏	1	60	10.85	8.2	有	3	172	82	27.72	157	108	44.8	14.7	17.4	42	97.6	4.97	1.89	3.2	1.13	10.85	84.5	5.83	270.9	2.45	1.11	86.06	7.46	3.59738	8.2	#NULL!	18.08	13.7	0.48	47.78	28.53	无	1	2	2	1	1.34	84.32	1.4	53.45	57.9	43.9	49.5
2	周立淼	1	67	6.23	7.4	有	3	173	82.5	27.57	143	80	35.7	19.4	17	16.8	70.8	4.69	1.06	2.89	1.32	6.23	71.9	5.34	348.9	2.25	1.45	91.79	5.16	1.42875	7.4	#NULL!	12.25	12.13	0.1	43.46	26.12	无	1	2	2	冠心病 不稳定心绞痛	1.03	62.28	2.32	53.3	52.9	43.6	51.6
2	刘华芳	2	63	7.01	9	有	3	161	65	25.08	101	75	42.3	27	22	33.5	56.7	6.55	1.54	4.63	1.3	7.01	68.7	6.4	218.9	2.36	1.36	81.49	17.27	5.38056	9	30.36	19.68	13.85	0.25	32.45	35.57	无	1	2	2	0	1.41	84.29	10.06	57.6	56.3	43.55	57.15
2	谷小龙	1	32	8.5	9.4	有	4	183	95	28.37	138	85	43.8	306.2	142.8	132.4	80	5.63	3.3	3.85	0.97	8.5	75.3	4.5	347.1	2.28	1.63	115.17	#NULL!	#NULL!	9.4	#NULL!	#NULL!	#NULL!	#NULL!	#NULL!	#NULL!	无	2	1	2	0	1.71	98.13	2.03	58.5	58	43.5	53.5
2	李晓天	1	56	10.63	9.6	有	5	180	100	30.86	146	84	43.9	73.9	44.3	42.2	88.4	6.51	3.18	4.47	0.83	10.63	86.3	4.3	421.4	2.35	1.31	86.25	17.45	8.24416	9.6	#NULL!	10.56	11.16	0.29	40.86	38.99	无	1	2	1	0	1.81	98.56	2.05	53.55	53.1	43.65	56.05
2	薛祥武	1	73	6.15	8.2	有	7	172	73	24.68	141	67	39	17.3	19.9	19.3	86.7	5.04	1.62	1.03	3.24	6.15	74.1	7.7	284.6	2.2	1.2	86.94	#NULL!	#NULL!	8.2	#NULL!	33.08	8.36	0.11	21.81	30.8	无	1	2	2	2	1.51	96.29	2.09	52.35	51.8	44.5	56.15
2	张素芹	2	54	6.44	8.6	有	9	163	82	30.86	118	79	44.5	14.4	16.8	21	136.1	5.17	2.29	1.06	3.46	6.44	70.3	6.9	265.5	2.4	1.34	84.47	#NULL!	#NULL!	8.6	#NULL!	10.33	29.1	0.98	87.63	50.55	非增殖期	1	1	2	1	1.62	99.23	4.3	55.5	56.5	46	57.25
2	李然花	2	63	8.17	8.9	有	10	153	80	34.17	151	77	40.8	14.2	10.7	33.4	110.5	4.92	1.16	2.73	1.66	8.17	67	5.25	299.76	2.34	1.39	84.04	#NULL!	#NULL!	8.9	#NULL!	16.19	17.83	0.5	51.77	46.52	无	2	1	2	1	1.21	90.21	1.56	52.7	53	42.15	64.4
2	王增印	1	66	4.36	6.5	有	10	170	76	26.3	133	83	38.5	14.3	15.8	14.8	66.6	4.11	1.12	2.71	0.88	4.36	73.9	6.77	279.98	2.2	1.12	91.42	7.31	1.41652	6.5	#NULL!	30.5	8.98	0.18	27.88	32.56	无	2	2	1	0	1.68	89.48	1.4	52.5	55.55	46.2	52.5
2	孙伟信	1	43	14.71	10.8	有	10	160	60	35.94	120	82	44.8	10.7	13	20.9	97.8	5.76	1.22	3.72	1.3	14.71	72.9	5.4	209.7	2.34	1.02	108.06	2.99	1.9548	10.8	#NULL!	19.48	12.38	0.42	32.68	50.88	无	2	1	2	0	1.57	79.41	1.3	51.9	56.4	44.5	54.35
2	郭晖	1	47	8.83	9.5	有	10	170	91	31.49	122	81	40.48	14	11.3	28.5	70.6	5.83	2.06	3.97	0.92	8.83	69	5.9	307.4	2.32	1.35	107.47	6.67	2.6176	9.5	#NULL!	19.35	12.59	0.46	36.09	18.94	有 非增值性	2	1	2	0	1.64	91.7	0.505	58	58.35	44.2	57.45
2	于建合	1	56	4.96	8.9	有	10	176	74	23.89	114	73	37.6	15.4	16.7	16.8	100.7	6.01	0.87	3.89	1.65	4.96	63.8	4.8	311.3	2.18	0.85	104.18	0.549	0.121024	8.9	42.79	#NULL!	#NULL!	#NULL!	#NULL!	#NULL!	无	2	1	2	0	1.22	87.91	1.19	53	54.6	44.4	56.6
2	谢巧雪	2	67	4.82	7.1	无	11	160	85	33.2	174	105	37	13.9	23.8	19.5	93.5	5.03	1.19	3.02	1.32	4.82	113.8	9.1	330.2	2.32	1.37	43.08	16.99	3.63964	7.1	#NULL!	12.56	29.92	0.79	85.06	43.48	有	2	2	2	0	1.45	81	2.06	63.15	61.8	46.35	57.2
2	裴志栋	1	54	13.88	9.4	有	11	176	80	25.83	112	76	44.7	15	15.2	49	80.2	5.95	2.21	1.01	4.21	13.88	65.2	5	374.2	2.38	0.85	104.72	12.37	7.63092	9.4	#NULL!	19.2	13.89	0.51	44.61	50.62	无	1	1	2	0	1.83	108.1	2.44	53.6	55.85	48.7	55.15
2	易连祥	1	55	9.9	8.2	无	20	179	90	28.09	144	96	43.7	27.4	25.2	32.6	64.4	4.35	1.75	1.26	2.64	9.9	76.6	4.8	354.5	2.28	1.13	97.32	16.17	7.1148	8.2	18.56	16.29	12.56	0.27	31.99	37.08	无	1	1	1	1	1.36	73.67	1.27	54.2	52.65	44.15	58.75
2	许静庭	1	67	5.21	6.3	有	20	180	76	23.46	127	75	37.9	12.3	16	13	87.9	4.7	1.14	0.9	3.34	5.21	64	4.2	287.4	2.22	1.38	96.31	4.95	1.1462	6.3	#NULL!	27.43	22.14	0.8	72.23	34.37	无	2	2	2	0	1.52	67.38	1.62	57	54.5	43.5	54.55
2	董新平	1	61	11.1	8.3	有	20	173	84	28.07	143	81	44.5	18.2	18.2	18.5	137.3	4.7	1.41	2.97	1.06	11.1	69.4	3.74	278.5	2.29	0.89	97.17	#NULL!	#NULL!	8.3	26.36	15.78	12.25	0.14	38.45	32.84	无	2	1	2		1.47	65.19	1.34	53.4	53.3	43.4	63.35
2	宋建辉	2	55	4.6	7.9	有	20	160	72	28.12	142	65	39.91	16.3	28	46.1	135	3	2.24	1.79	0.78	4.6	248.7	15.31	261.8	2.23	1.52	18.21	#NULL!	#NULL!	7.9	#NULL!	#NULL!	#NULL!	#NULL!	#NULL!	#NULL!	未查	2	1	2	0	1.07	79.12	2.14	56.9	58.2	43.95	61.1
2	常敏	2	74	11.91	11.3	有	20	156	60	24.65	164	98	38.7	11.9	14.2	19.8	71.6	7.98	1.3	5.34	1.42	11.91	67.9	4.38	234.1	2.34	0.93	76.5	2.56	1.35509	11.3	33.81	14.9	14.48	0.17	37.15	64.59	无	2	1	2	0	1.56	119.4	1.04	58.55	55.8	42.95	58.95
2	王惠荣	2	65	3.92	8.5	有	27	164	70	26.03	127	71	39.2	17.4	23.7	11	81.5	4.84	0.84	2.96	1.05	3.92	60.2	7.1	233.7	2.18	1.25	92.05	#NULL!	#NULL!	8.5	#NULL!	21.19	13.17	0.45	48.18	53.71	有	2	1	2	1	1.41	110	3.29	59.6	52.55	45.25	51.45
2	郭惠英	2	73	5.88	8.2	有	27	157	57	23.12	176	91	39.5	10.3	13.6	13.8	79.2	5.1	1.07	3.26	1.06	5.88	63.4	3.7	277.9	2.21	1.23	83.68	108.6	28.3808	8.2	19.79	23.72	21.55	0.78	65.59	53.93	无	1	1	2	1	1.14	77.82	2.67	54.35	56	45.45	53.45
[truncated: 34 more columns]

## Sheet: 1+2
分组	姓名	性别	年龄2	新空腹血糖	新糖化	神经病变有无	病程2	身高	体重	BMI	收缩压	舒张压	白蛋白	谷丙丙氨酸	谷草天冬氨酸	r谷氨酰	碱性磷酸酶	总胆固醇	甘油三酯	低密度	高密度	旧FBG	肌酐	尿素氮	尿酸	血钙	血磷	肾小球滤过率	空腹胰岛素	HOMAIR	糖化血红蛋白_1	糖化白蛋白	维生素D3	骨钙素	B胶原特殊序列	总I型胶原氨基酸延长肽	甲状旁腺素	视网膜病变有无	有无二甲双胍	有无用胰岛素	有无GLP1	冠心病0无1有冠心病无心梗2有过心梗的	总T3	总T4	TSH	尺神经运动	正中神经运动	腓总神经运动	尺神经感觉
1	代国清	1	54	9.91	8.1	无	0.015	160	72	28.12	154	117	45.7	17.3	17.9	100.4	118.8	6.45	1.17	4.47	1.31	9.91	80	7.3	399.4	2.39	1.12	95.85	5.34	2.35197	8.1	#NULL!	20.57	10.68	0.16	25.38	46.42	无	1	2	2	0	2.47	127	1.53	59.1	59	52.15	50.95
1	司晓鹏	1	33	11.3	9.6	无	0.02	170	88	30.45	102	75	#NULL!	#NULL!	#NULL!		#NULL!	5.88	2.09	#NULL!	#NULL!	11.3	#NULL!	#NULL!	#NULL!	#NULL!	#NULL!	#NULL!	#NULL!	#NULL!	9.6	25.13	12.53	15.53	0.55	70.45	49.49	无	1	1	1	0	1.8	85.38	1.39	52.5	57.5	47.5	62.5
1	王艳茏	2	46	6.44	6.9	无	0.03	166	50	18.14	106	74	35.5	16.7	17.4	31.1	62.7	3.99	0.52	1.31	2.47	6.44	62.7	4.2	214.6	2.17	1.55	102.61	#NULL!	#NULL!	6.9	#NULL!	#NULL!	#NULL!	#NULL!	#NULL!	#NULL!	无	2	1	2	0	1.02	104.2	1.5	65.3	63.05	48.4	79.45
1	杨华勤	2	52	7.81	7.8	无	0.04	173	86	28.73	133	97	43.2	74.9	55	30.1	110.9	4.56	1.94	0.98	3.08	7.81	56.1	6.1	223.2	2.51	1.22	103.22	24.63	8.54935	7.8	17.3	18.67	16.55	0.64	69.96	67.84	无	1	2	2	0	1.87	115.1	0.989	58.1	56.7	48.7	57.1
1	张玉苗	1	33	10.46	8.8	无	0.04	178	68	21.46	123	101	47.3	22.1	18	24.5	81.5	5.13	2.52	3.3	1.07	10.46	74	4.07	303.1	2.33	1.11	115.21	6.01	2.79398	8.8	#NULL!	24.03	12.79	0.19	35.06	30.95	无	1	1	2	0	1.51	94.55	2.76	62	58.5	46.5	66.9
1	刘伟	1	33	9.89	8.7	无	0.07	176	97	31.31	149	96	44.8	29.3	21.9	115.9	121.4	4.33	3.66	2.89	0.86	9.89	76.3	5.3	326.3	2.33	1.38	113.8	#NULL!	#NULL!	8.7	#NULL!	#NULL!	#NULL!	#NULL!	#NULL!	#NULL!	无	1	1	1	0	1.92	96.55	2.15	54.1	53.35	48.3	68.4
1	齐宝凤	2	55	17.72	13.6	无	0.1	160	60	23.44	135	91	#NULL!	#NULL!	#NULL!		133.7	6.31	5.28	#NULL!	#NULL!	17.72	#NULL!	#NULL!	#NULL!	#NULL!	#NULL!	#NULL!	#NULL!	#NULL!	13.6	#NULL!	#NULL!	#NULL!	#NULL!	#NULL!	#NULL!	无	1	1	2	0	1.01	84.92	2.01	65	58.4	50.15	58.35
1	武艳涛	1	37	8.1	10.2	无	0.1	169	64	22.4	121	72	38	27	39.8	24.9	77	3.53	1.38	2.17	0.88	8.1	68.9	3.5	349.9	2.28	1.53	115.36	2.52	0.9072	10.2	#NULL!	12.33	17.1	0.89	108.3	37.24	无	2	1	2	0	1.39	109.1	12.69	55.65	59.65	44.55	51.65
1	商段果	2	62	3.96	7.5	无	0.1	163	65	24.46	148	75	40.8	54.3	58.7	69	110.4	3.7	1.79	1.11	2.17	3.96	65	4.1	262.5	2.24	1.4	87.79	5.41	0.95216	7.5	#NULL!	35.5	20.01	0.7	55.59	45.98	无	1	2	2	0	2.41	161.1	6.07	63	58.5	47	60.1
1	彭海云	1	52	8.24	10.6	无	0.1	172	80	27	145	97	41	9.6	20.4	21.6	94.1	4.65	1.56	0.76	3.26	8.24	80.4	8.4	314.3	2.18	1.19	96.63	8.43	3.08725	10.6	27.45	18.07	11.94	0.37	41.27	40.45	无	1	2	2	0	1.7	94.55	0.837	58.5	57	44	61.75
1	张二菊	2	50	8.5	8.1	无	0.2	162	60	22.86	155	81	43.8	16.3	19.5	30.8	70.4	4.79	1.49	3.21	1.06	8.5	58.43	6.57	257.4	2.35	1.14	92.31	#NULL!	#NULL!	8.1	#NULL!	22.83	12.53	0.56	51.38	56.28	无	1	1	2	2	1.33	71.16	4.29	62	63	48.5	56
1	张云山	1	56	9.06389	5.6	无	0.2	168	62	21.97	94	73	#NULL!	#NULL!	#NULL!		#NULL!	#NULL!	#NULL!	#NULL!	#NULL!	9.06	#NULL!	#NULL!	#NULL!	#NULL!	#NULL!	#NULL!	#NULL!	#NULL!	5.6	#NULL!	#NULL!	#NULL!	#NULL!	#NULL!	#NULL!	无	1	2	2	0	#NULL!	#NULL!	#NULL!	55.8	54.55	48.75	56.1
1	赵森虎	1	46	6.1	13.7	有	0.2	170	64	22.15	123	70	39.92	18.3	15.5	13.5	99.2	4.61	0.61	3.07	1.01	6.1	62.5	3.9	254.82	2.3	1.32	112.72	4.47	1.21187	13.7	#NULL!	10.43	15.39	0.92	36.73	45.71	无	1	1	2	0	1.23	91.05	1.85	57	60	51	56.95
1	郝芳宾	2	40	20.12	12.9	2月	0.2	53	20.7	20.7	126	84	41.7	25.1	24.2	21.9	90.2	5.81	2.09	4.11	0.83	20.12	61.3	5	170	2.34	0.99	109.06	3.92	3.5054	12.9	0	13.89	9.04	0.23	26.07	33	有	2	1	2	0	1.31	87.82	1.6	54.65	54.45	43.9	53.25
1	臧少卫	2	49	9.06389	11.12	无	0.3	162	64	24.39	127	86	#NULL!	#NULL!	#NULL!		#NULL!	#NULL!	#NULL!	#NULL!	#NULL!	9.06	#NULL!	#NULL!	#NULL!	#NULL!	#NULL!	#NULL!	5.61	#NULL!	11.12	#NULL!	16.54	10.84	0.4	42.42	31.53	无	1	2	2	0	1.75	115.8	1.09	58.5	62	47.5	59.2
1	李明	1	62	4.84	9.1	有	0.4	183	87	25.98	143	82	38	21.5	19.5	14.2	85.8	2.09	1.1	1.28	0.53	4.84	69.1	3.8	249.7	2.09	1.68	96.66	#NULL!	#NULL!	9.1	#NULL!	18.59	22.13	#NULL!	#NULL!	43.57	无	1	1	2	0	1.79	113.1	0.201	67.25	62.3	#NULL!	65.9
1	牛景雁	2	38	4.95	6.8	无	0.5	165	67	24.61	108	83	40.6	10.2	12.9	8.7	38.9	4.2	0.8	2.69	0.97	4.95	55.6	5.6	280.1	2.25	1.35	114.22	6.66	1.4652	6.8	#NULL!	23.23	14.48	0.41	35.25	39.56	无	1	1	2	0	1.28	69.48	3.71	54.1	55.55	48.9	58
1	徐运华	2	64	5.69	8.84177	有	0.5	160	69	26.95	154	76	44.1	14.2	17.8	19	104.6	2.72	1.04	1.56	0.81	5.69	58	6	212.7	2.35	1.14	93.85	#NULL!	#NULL!	8.85	#NULL!	#NULL!	#NULL!	#NULL!	#NULL!	#NULL!	有	1	2	2	0	1.47	97.16	6.03	56.75	52.45	45	52
1	边江	1	44	8.2	5.2	无	0.6	172	75	25.35	107	71	39.5	45	21.4	34.7	70.1	5.4	2.1	3.56	1.16	8.2	77.41	5.59	292.01	2.28	1.38	104.69	9.77	3.56062	5.2	#NULL!	14.82	13.25	0.47	41.08	33.18	无	2	2	2	0	1.57	56.97	2.47	57.25	56.75	45.25	57.9
1	裴慈恩	2	37	6.72	7.5	无	0.6	158	59	23.63	114	85	48.9	15.8	18	23.4	71.6	5.79	1.85	3.94	1.07	6.72	70.3	4.2	343.4	2.43	1.12	95.23	6.46	1.92939	7.5	#NULL!	#NULL!	#NULL!	#NULL!	#NULL!	#NULL!	无	2	2	2	0	1.34	117.5	1.53	58.25	62.3	48.7	57.6
1	齐恒建	1	56	9.06389	6.4	无	0.6	168	87	32.74	136	101	46.1	12.6	14.1	21.4	94.7	5.35	2.65	3.9	0.78	9.06	89.4	7.4	408	#NULL!	#NULL!	62.31	11.2	#NULL!	6.4	#NULL!	11.53	8.19	0.45	42.97	62.75	无	2	2	2	0	1.55	112.3	1.64	63.5	58	48	62.2
1	王凤霞	2	55	9.06389	14.2	有	0.6	163	70.5	26.53	154	101	#NULL!	#NULL!	#NULL!		#NULL!	#NULL!	#NULL!	#NULL!	#NULL!	9.06	#NULL!	#NULL!	#NULL!	#NULL!	#NULL!	#NULL!	1.92	#NULL!	14.2	#NULL!	14.22	13.59	0.51	53.83	39.35	无	1	1	2	0	1.46	81.51	2.38	55.45	53.3	46.6	60.65
1	赵风岐	1	62	7.82	5.2	有	0.6	170	62	21.45	120	59	37.7	23	18.5	13.2	64.6	7.78	0.9	1.41	5.45	7.82	64.1	4.5	165.6	2.12	0.91	99.69	2	0.695111	5.2	51.31	#NULL!	#NULL!	#NULL!	#NULL!	#NULL!	无	1	1	2	0	1.1	66.54	9.24	52.95	47.05	43.2	52.5
1	朱卫东	1	51	5.11	5.6	有	0.6	170	90	31.34	128	75	41.1	20.3	19.7	29.5	68.4	5.28	1.76	1.17	3.54	5.11	66.4	5.4	504.5	2.31	1.44	106.15	11.84	2.689	5.6	13.86	28.9	20.14	0.38	52.58	45.13	无	1	2	2	1	1.52	80.17	2.57	54.65	55.9	48.05	65.5
1	倪立新	1	51	7.36	7.9	无	1	172	77	26.03	124	77	43.4	18.8	15.1	40.8	73.5	4.88	5.14	2.85	0.81	7.36	82.1	6	339.4	2.31	1.2	94.88	#NULL!	#NULL!	7.9	#NULL!	9.31	12.39	0.28	28.02	38.61	无	1	2	2	0	1.47	75.14	1.33	59.85	59.1	44.25	64.05
1	倪卫江	1	43	6.57	8.1	无	1	170	94	32.53	146	90	43.9	9.5	12	25.6	81.6	6.32	2.3	4.44	0.8	6.57	83.1	6.4	459.6	2.29	1.5	98.91	6.17	1.80164	8.1	#NULL!	#NULL!	#NULL!	#NULL!	#NULL!	#NULL!	无	1	2	2	0	1.39	75.66	2.55	54.2	53.5	47	65.1
1	王彦民	1	56	6.14	5.8	无	1	170	55	19.03	115	71	44.8	23.3	23.8	46.8	110.2	4.09	0.69	2.15	1.58	6.14	82.6	5.01	277.7	2.4	1.13	90.99	2.98	0.813209	5.8	18.98	28.01	9.7	0.14	50.05	19.54	无	2	2	2	0	1.73	109.7	2.59	59.55	59.05	46.25	61.25
1	罗士秀	2	71	4.68	6.7	无	1	155	70	29.14	137	82	36.5	21.1	22.1	22.6	73.9	7.22	2	4.72	1.44	4.68	64	4.1	256.8	2.23	1.13	84.05	#NULL!	#NULL!	6.7	#NULL!	8.64	25.53	0.6	69.04	62.45	无	2	1	2	0	1.72	89.49	1.01	52.15	54.9	45	64.55
1	甄献花	2	50	11.87	13	有	1	160	64	25	114	86	38.9	35.6	24.7	71	93	6.76	2.51	4.57	1.2	11.87	49.34	4.07	277.97	2.47	1.73	109.19	#NULL!	#NULL!	13	#NULL!	14.15	9.7	0.35	40.72	19.13	无	1	1	2	0	1.29	106.8	1.31	53.35	54.7	45	61.1
1	耿敖孩	1	55	7.11	11.8	有	1	175	70	22.86	149	93	43.4	33.4	25	50.8	138.9	5.36	1.12	3.43	1.03	7.11	71.4	4.8	245.8	2.35	1.07	100.18	#NULL!	#NULL!	11.8	#NULL!	15.54	15.33	0.7	71.78	33.96	无	2	1	2	0	1.92	127.5	2.11	65.5	62.5	45.5	53.55
1	常宏	1	39	5.25	5.8	有	1	175	70	22.86	107	72	40.2	12.5	13	12.3	49	4.26	1.45	0.91	3.17	5.25	69.8	6	265.8	2.22	1.45	113.17	4.31	1.00567	5.8	14.37	#NULL!	#NULL!	#NULL!	#NULL!	#NULL!	无	1	2	2	0	1.5	81.73	4.75	54.9	55.75	43.4	52.45
1	赫志花	2	68	9.55	9.1	无	2	155	72	29.97	123	88	40.02	30.9	23	24.8	87.2	6.57	1.71	4.27	1.58	9.55	82.1	3.84	188.15	2.26	1.16	63.46	6.86	2.91169	9.1	#NULL!	25.91	18.23	0.62	44.25	24.14	无	1	2	2	1	0.898	83.55	2.78	52.65	54.25	48.3	59.35
1	王洋	1	27	8.17	10.9	无	2	183	90	26.87	139	93	40.6	12.8	12.3	29.5	40.9	3.15	0.76	2.09	0.81	8.17	63.43	5.1	274.83	2.35	1.38	128.03	9.2	3.34062	10.9	#NULL!	13.45	13.15	0.46	25.82	37.54	无	1	2	2	0	1.19	84.81	1.35	61	60.5	49.5	59
1	张守龙	1	42	8.55	8	无	2	175	95	31.02	136	90	44.7	36.4	29	29.3	99.3	5.34	3.26	3.33	0.99	8.55	66.2	7.6	452.7	2.28	1.41	113.22	22.84	8.6792	8	#NULL!	22.97	16.26	0.5	74.7	45.5	无	1	2	2	0	1.48	74.5	2.63	53.55	55.5	44.35	60.45
1	张兆	1	44	5.09	6.2	无	2	173	70	23.39	137	97	42.3	18.3	20.7	82.1	75.7	5.03	3.47	2.86	1.09	5.09	88.9	4.8	510.4	2.31	1.18	90.52	#NULL!	#NULL!	6.2	#NULL!	14.68	17.19	0.68	49.16	60.26	无	1	2	2	0	1.5	82.78	1.59	63.35	61.4	50.7	65.85
1	邵晨	1	40	12.86	9.4	无	2	170	69	23.88	129	69	42.6	19	17	24	45.4	4.09	2.43	0.97	2.77	12.86	62.8	5.3	283	2.47	1.16	117.34	8.61	4.92109	9.4	24.02	17.96	11.68	0.24	19.38	34.4	非增殖期	1	2	1	0	1.54	118.9	0.963	52.45	53.1	43.95	59.35
1	王建霞	2	50	5.35	5.7	无	2	162	55	20.96	103	61	40.8	12.9	16	13.5	84.2	5.87	4.3	1.02	3.67	5.35	54.9	5.4	523.42	2.43	1.12	105.42	9.15	2.17567	5.7	15.07	19.37	36.19	0.73	85.03	47.57	无	2	2	2	0	1.12	66.67	3.27	58.65	57.15	49.55	62.45
1	刘克敏	1	42	8.66	7.7	无	2	186	90	26.01	131	87	45.9	31.5	24.6	71.1	55.2	5.77	3.11	1.17	3.77	8.66	86.5	7.2	504.4	2.39	0.89	94.89	18.15	6.98573	7.7	22.31	21.19	9.87	0.18	17.55	49.13	无	1	2	2	0	1.47	93.45	2.26	60.9	60.65	48.9	56.5
1	刘志宏	1	49	6.49	6.5	无	2	178	87	27.46	177	98	43.9	25.5	21.8	112	94.4	5.07	2.29	1.17	3.4	6.49	65.7	6.4	361.9	2.34	0.88	108.12	14.84	4.28052	6.5	16.28	16.31	12.09	0.48	32.11	61.42	无	1	2	2	0	1.4	85.89	1.38	63	60.65	46.75	59.6
1	吴力强	1	35	10.1	8.4	无	2	170	66	22.84	125	75	44.8	35.9	31.7	50.1	108.1	9.08	16.25	3.68	0.63	10.1	79.1	5.2	306.3	2.28	1.11	110.53	7.29	3.2724	8.4	#NULL!	15.34	13.42	0.85	56.42	26.49	无	2	1	2	0	1.34	91	2.67	67.25	63.1	45	65.4
1	张险峰	1	48	7.76	7	有	2	180	75	23.15	121	86	44.5	15.7	18.8	25.6	61.2	5.81	1.77	3.85	1.35	7.76	70.1	6.3	337	2.37	1.15	106.05	11.45	3.94898	7	20.95	16.65	14.56	0.41	29.16	46.47	无	1	2	2	0	1.53	94.92	0.598	55.25	54.35	46.4	60.45
1	赵国栋	1	64	4.44	6.2	有	2	160	72	28.12	108	80	43	23.6	22.4	20.1	62.9	2.43	1.42	0.67	1.5	4.44	95.7	7.2	347.7	2.2	1.18	71.95	10.99	2.16869	6.2	17.13	15.11	12.84	0.49	55.11	59.76	无	2	2	2	0	1.72	86.7	2.96	55.6	52.95	47.25	58.15
1	张少楠	2	26	7.42	9.14	有	2	158	75	30.04	123	91	41.9	51.7	40.3	30.6	72.6	3.44	0.81	1.87	1.22	7.42	51.7	4.6	263.6	2.34	1.33	127.27	40.49	13.3527	9.14	#NULL!	10.68	16.46	0.74	66.69	48.07	无	1	2	1	0	2.06	101.8	2.92	59.8	58.35	52.45	67.1
1	杜亮波	1	41	14.95	8.6	有	2	170	85	29.41	135	97	45.1	12.1	12.7	23	82.3	4.13	4.39	2.86	0.7	14.95	82.7	4.9	498	2.37	1	100.85	19.86	13.1959	8.6	#NULL!	15.9	14.96	0.29	39.07	45.66	无	1	1	1	0	1.6	99.48	3.86	53.7	54.4	43.55	53.7
1	曹彦芳	2	63	5.63	7.5	2年	2	63	16.91	16.91	170	93	36.5	9.6	14.5	12.1	92.7	5.08	1.28	3.12	1.2	5.63	50.6	3.7	242.8	2.2	1.1	98.84	7.09	1.7741	7.5	17.92	16.95	11.59	0.4	42.35	50.17	无	1	2	2	0	1.21	76.4	0.8	59.9	54.05	52.9	62.95
1	王延民	1	58	7.22	8	无	3	174	88	29.07	154	92	41.72	35.9	42.3	60	82.8	4.32	3.45	2.5	1.05	7.22	67.9	5.36	354.56	2.26	1.46	100.13	#NULL!	#NULL!	8	#NULL!	19.48	10	0.3	36.6	43.18	无	1	2	2	1	1.42	77.96	1.07	50.85	59	44.8	57.15
1	烟硕	1	31	7.04	8.84177	无	3	180	101	31.17	170	113	43.5	32.9	21.5	130.3	62.1	4.82	3.8	3.3	0.74	7.04	76.7	4.4	358.2	2.25	1.4	115.11	#NULL!	#NULL!	8.8	#NULL!	9.56	14.49	0.51	33.33	49.28	非增殖期	1	1	1	0	#NULL!	#NULL!	#NULL!	54.1	54.15	46.2	63.15
1	朱风科	1	53	8.23	10.4	无	3	172	82	27.72	119	82	38.7	87.9	49.6	76.2	69.4	3.7	1.24	0.75	2.38	8.23	81.7	5.1	270.6	2.26	1.54	94.11	#NULL!	#NULL!	10.4	#NULL!	11.87	11.92	0.27	34.73	21.16	无	1	1	2	1	1.25	94.42	2.72	55.9	55.35	51.05	58.35
1	王彩芬	2	69	9.33	8.5	无	3	168	70	26.35	159	85	41.9	22.1	20.1	32.6	124.3	3.55	1.26	1.02	2.24	9.33	55.7	4.4	182.6	2.32	1.23	91.81	10.03	4.15911	8.5	24.61	22.82	25.57	0.94	69.16	49.14	无	1	1	2	0	1.36	87.19	2.17	55.5	56	55.5	55.75
1	朱会彬	1	55	7.61	6.6	无	3	#NULL!	#NULL!	#NULL!	128	78	39	16.6	21	44.7	68	7.27	3.96	4.94	1.13	7.61	88.2	5.3	322.6	2.14	1.06	84.6	4.67	1.5795	6.6	#NULL!	11.63	9.64	0.41	25.93	89.4	无	1	2	2	？	#NULL!	10.18	57.32	58.5	62.5	47	56.7
1	马京学	1	43	8.51	8.6	无	3	170	93	29.41	133	102	44	22	14.2	39.2	59.4	4.8	2	3.03	0.95	8.51	74.9	6.75	479.5	2.44	1.4	106.89	#NULL!	#NULL!	8.6	17.94	15.83	9.41	0.47	34.71	48.44	无	1	2	1	0	1.95	100.9	4.21	56.85	56.55	51.7	60.3
1	王敏	1	79	7.64	6.8	有	3	170	60	20.76	130	66	39.3	18.8	22.1	13.6	56.6	5.25	0.61	3.07	1.42	7.64	65.4	3.7	203.6	2.26	0.96	87.74	#NULL!	#NULL!	6.8	#NULL!	11.46	15.62	0.42	36.08	53.18	无	2	2	2	0	1.14	67.11	1.3	55	55	45	54.3
1	祖利锋	1	37	17.27	13.3	有	3	173	63	21.05	104	78	44.4	16.7	14.1	16.6	117.4	6.4	0.73	4.25	1.29	17.27	69.2	4.4	208.4	2.45	1.39	115.15	3.28	2.51758	13.3	#NULL!	23.91	15.41	0.58	51.22	48.43	无	1	1	2	0	1.66	126.7	0.934	55.5	58	46.5	59.65
1	杜文谦	1	51	5.43	5.5	有	3	172	60	20.28	122	77	41.5	10.2	16.4	20.8	67.3	4.4	0.65	1.35	2.55	5.43	80.9	3.5	328.7	2.37	0.87	96.63	7	1.68933	5.5	#NULL!	22.29	15.39	0.95	33.05	70.4	无	2	1	2	0	1.33	83.25	2.6	62	61.5	48	63.15
1	崔贺来	1	70	6.49	7.3	有	3	175	78	25.47	123	62	39.8	19.8	20.5	22.2	39.9	3.48	0.86	1.22	1.98	6.49	84.9	5.2	395.6	2.3	1.23	79.73	9.1	2.62484	7.3	22.19	7.05	12.22	0.15	26.51	53.76	无	2	2	2	2	1.59	76.46	3.89	55.5	56.5	46.5	52.1
1	刘涵	2	44	10.45	8.7	有	3	166	70	25.4	126	80	37.6	22.8	18.4	24.7	53.8	4.95	2.25	3.28	0.88	10.45	57.1	3.9	154.2	2.27	1.13	108.56	#NULL!	#NULL!	8.7	25.92	13.88	10.85	0.35	46.93	33.7	无	1	2	1	0	1.44	81.76	1.35	52	52.75	45.25	55.5
1	张彦琴	1	62	7.45	7.1	有	3	171	76	25.99	141	71	44.2	17	17.6	22.7	134.3	5.17	1.01	3.21	1.35	7.45	64	7.77	242.3	2.37	1.09	89.42	10.57	3.49984	7.1	16.66	19.61	22.66	0.54	51.67	40.52	有	1	2	2	0	1.57	72.56	0.217	62.1	58.95	48.9	65.25
1	黄雪南	2	47	5.39	6.6	无	4	162	60	22.86	149	94	40.28	31.3	18.7	17.8	68.9	3.1	1.54	2.01	0.84	5.39	56.9	3.73	273.25	2.19	1.22	106.41	#NULL!	#NULL!	6.6	#NULL!	34.91	9.79	0.17	24.52	35.91	无	1	1	2	0	1.54	103.2	0.685	52.7	64.35	55	54.9
1	李世亮	1	63	7.28	8.1	无	4	170	75	25.95	118	71	42.9	13.7	20.8	14.9	56.9	6.2	0.82	3.81	1.63	7.28	72.5	6	246.5	2.27	0.94	94.11	#NULL!	#NULL!	8.1	#NULL!	#NULL!	#NULL!	#NULL!	#NULL!	#NULL!	无	2	1	2	0	1.63	102	1.01	55.7	58.4	43.9	58
1	兰晓辉	2	41	3.63	5.6	无	4	158	74	29.64	116	83	39.9	14.6	17.5	19	75.2	4.05	1.68	2.37	1.32	3.63	69.6	5.7	223.2	2.34	1.42	93.72	36.64	5.91125	5.6	14.09	13.61	17.17	0.45	55.98	44.85	无	1	2	1	0	1.75	94.81	1.2	59.5	61.4	51.9	63.85
1	苗龙兴	1	61	4.79	6.4	无	4	180	94	29.01	137	88	36.9	32.6	22.8	42.6	68.5	4.67	1.27	2.96	1.05	4.79	79.2	5	401.6	2.21	1.22	92.03	13.53	2.88039	6.4	#NULL!	17.58	16.66	0.33	38.07	36.87	无	2	2	2	0	1.48	109.9	0.807	53.7	53.85	44.55	59.2
1	王占久	1	59	6.32	6.5	无	4	175	80	26.12	146	89	38.9	13.8	15.7	35.9	60	3.97	1.04	2.56	0.95	6.32	134.6	9.6	333.6	2.16	1.24	49.32	7.33	#NULL!	6.5	19.13	23.86	14.35	0.5	53.31	50.2	无	2	2	2		1.41	71.78	0.786	55.2	58.75	45.8	59.4
1	陈晓宁	2	45	9.07	8	无	4	161	62	23.92	119	71	42.23	9	11.2	15.1	86.4	5.05	1.15	3.25	1.14	9.07	60.8	4.47	224.6	2.4	1.25	105.59	10.3	4.15204	8	#NULL!	12.18	12.04	0.49	32.08	39.94	无	1	2	2	0	1.54	88.51	4.92	54.95	58.35	47.25	65.45
1	王健	1	55	7.9	8.3	有	4	172	80	27.04	146	94	46.31	24.5	25.7	36	34.1	6.18	1.9	4.2	1.26	7.9	81.5	5.4	316.8	2.36	1.02	93.08	#NULL!	#NULL!	8.3	#NULL!	24.74	11.2	0.03	31.6	58.42	有 非增值性	1	2	2	0	1.9	107.3	3.46	54	57.2	45.15	54.7
1	田虹	2	58	7.68	6.9	无	5	162	52	19.81	125	88	44.9	16.8	14.9	18.1	83.8	6.79	1.62	4.63	1.32	7.68	47.6	4.4	254.2	2.28	1.35	104.45	#NULL!	#NULL!	6.9	#NULL!	25.03	18.71	0.49	49.35	38.98	无	2	2	2	0	0.958	60.13	1.93	59.75	58.25	51.85	54.95
1	张春芳	2	60	6.44	6.6	无	5	160	52	20.31	117	80	42.1	27.2	23	19.6	63.7	4.33	0.8	2.9	0.91	6.44	70.6	4	262.1	2.24	1.17	80.57	#NULL!	#NULL!	6.6	#NULL!	16.31	15.9	0.51	64.4	49.53	无	2	2	2	0	1.2	98.08	1.87	57.05	60.3	48.4	64.6
1	宋双印	1	47	9.48	8.4	无	5	160	70	27.34	112	88	43.6	12.5	14.4	16	99.9	3.9	0.99	2.52	1.05	9.48	77.5	3.9	191.6	2.35	0.99	102.46	6.29	2.65019	8.4	24.73	14.97	15.96	0.48	46.8	54.62	无	1	2	2	0	1.49	80.87	2.49	68.5	58.5	50	61.05
1	赵俊喜	2	61	8.2	12.2	无	5	160	55	21.48	144	80	38.5	10.8	15.4	15.6	95.3	4.98	1.45	2.99	1.24	8.2	53.5	5.7	276.3	2.25	1.39	98.42	0.992	0.361529	12.2	#NULL!	11.95	13.52	0.36	38.96	27.25	有	2	1	2	0	1.2	100.6	0.776	57.9	54.55	48.7	47.3
1	韩淑珍	2	69	7.31	7.5	无	5	176	80	26.91	142	74	35.6	23.1	20.1	21.6	73.4	3.42	0.96	1.27	1.84	7.31	58.4	5.8	365.8	2.13	1.35	90.4	8.35	2.71282	7.5	#NULL!	19.81	18.78	0.6	64.71	51.39	无	1	2	2	2	1.16	63.27	1.36	55.65	55.1	48.1	65.15
1	白金海	1	52	5.04	8.9	无	5	168	73	25.86	184	109	40.5	84	117.1	312.9	51.7	7.21	1.82	5.05	1.11	5.04	70.6	5.83	202.7	2.33	1.7	102.78	3.73	0.83552	8.9	#NULL!	13.69	7.55	0.12	30.63	27.47	无	1	2	1	1	1.14	70.24	3.57	53.85	54.25	44.7	52.65
1	袁庆生	1	60	4.49	6.6	无	5	172	74	25.01	103	69	43	9.6	17.1	6.2	54.2	6.48	1.26	4.44	1.3	4.49	111.6	6.3	416.4	2.44	1.2	61.45	3.3	0.658533	6.6	#NULL!	15.73	13.26	0.52	35.53	47.58	无	2	2	2	0	1.11	93.86	0.991	52.2	53.35	44.2	53.25
1	习立新	1	40	7.87	7.2	无	5	179	102	31.83	138	98	43.8	35.3	22	29.9	91.2	4.11	2.4	2.73	0.9	7.87	77.5	4.63	356	2.36	0.97	107.61	19.83	6.93609	7.2	20.93	23.38	11.37	0.05	38.3	35.19	无	1	2	1	0	1.41	94.13	2.16	56.95	59.45	45.6	54.25
1	刘冲	1	34	7.98	7.4	有	5	180	100	30.86	133	98	47	49.8	28.1	43.7	93.8	3.9	1.72	3.01	0.77	7.98	80.7	5.1	261.4	2.35	1.04	109.2	19.3	6.84507	7.4	#NULL!	10.13	16.4	0.39	56.82	54.71	无	1	2	1	0	2.3	111.6	1.63	55.7	53.45	49.05	50.65
1	张建辉	1	47	7.97	7.3	无	6	169	82	28.71	130	92	47.83	12.9	17.8	26.5	25.5	5.04	1.15	3.21	1.37	7.97	73.9	6.34	327.78	2.33	1.5	104.48	#NULL!	#NULL!	7.3	#NULL!	34.7	11.1	0.29	34.81	17.28	无	1	2	1	0	1.58	97.71	1.92	58.35	58.2	48.3	59
1	张胜	1	50	12.48	7.8	无	6	165	60	22.04	100	72	46.5	26.1	17.7	31.6	89.7	3.84	1.91	2.4	1.01	12.48	77.8	5.4	192.3	2.39	0.98	110.17	#NULL!	#NULL!	7.8	#NULL!	18.17	6.87	0.27	26.96	36.7	有	2	1	2	0	1.35	106.4	0.408	54.15	56.55	47.85	53.95
1	解崇玉	1	63	12.45	9.6	无	6	153	46	19.65	99	65	40.6	9.3	14.9	13	84.3	5.59	1.41	4.05	1.08	12.45	63	5.8	227.6	2.32	1.06	90.46	21.86	12.0959	9.6	#NULL!	28.38	16.72	0.4	33.92	29.22	无	2	2	2	0	1.13	89.32	2.1	58.9	57.05	47.85	60.4
1	王嘉婕	2	28	15.06	11.8	无	6	162	68	25.91	120	83	40.3	10.4	12.3	25.9	51.7	4.61	4.64	2.9	0.85	15.06	56.3	2.5	344	2.19	0.85	122.03	5.29	3.54077	11.8	#NULL!	#NULL!	#NULL!	#NULL!	#NULL!	#NULL!	无	2	1	2	0	1	82.23	4	54.3	54.2	45.1	57.3
1	付拴云	1	63	10.01	11.9	无	6	170	70	24.22	125	74	37.7	29.8	20.7	14	131.6	2.22	0.62	0.78	1.26	10.01	62.8	5.3	283	2.24	1.03	99.83	2.94	1.30797	11.9	49.89	23.39	8.64	0.35	32.47	28.96	无	1	1	2	0	1.06	81.21	1.01	54.95	55.3	46.1	51.85
1	李殿京	1	55	8.3	6	无	6	165	70	25.71	125	84	45.27	25.3	18.7	30.6	67.8	4.34	2.21	2.64	1.05	8.3	71.6	6.43	311	2.35	1.07	100.06	26.42	9.74604	6	14.06	20.56	11.28	0.46	32.97	45.86	无	1	2	2	0	1.89	98.51	1.13	58	58	49	58.35
1	李维英	2	71	6.65	6.5	无	6	160	74	28.91	121	84	40	14.4	29.3	12.9	53.5	5.61	1.37	3.59	1.18	6.65	63.6	5.1	315.9	2.22	0.93	84.55	#NULL!	#NULL!	6.5	19.49	22.38	11.37	0.27	41.03	41.12	无	1	2	2	0	1.41	61.85	3.91	57.85	53.4	48.45	55.25
1	解方淼	1	49	15.61	10	有	6	170	64	22.15	144	102	40.6	15.7	11.9	27.5	80.5	4.4	0.96	3.03	0.87	15.61	65.97	7.25	182.89	2.27	0.98	107.94	#NULL!	#NULL!	10	#NULL!	14.19	6.94	0.52	18.74	39.28	无	1	1	2	0	0.895	67.09	2.81	55.15	55.95	46.1	52.2
1	王增辰	1	54	4.76	11	有	6	164	69	25.65	115	70	42.2	16.5	18	16.9	79.4	4.15	1.19	2.47	1.16	4.76	79.7	7.9	232.2	2.27	1.44	96.42	0.865	0.182996	11	#NULL!	14.1	11.87	0.48	45.14	37.42	无	1	1	2	0	1.36	4.1	0.921	54.45	51.55	46.1	49.9
1	陈国英	1	70	8.89	8.2	有	6	160	65	25.39	143	75	40.5	13.3	17.8	14.4	77.7	3.27	1.4	1.32	1.78	8.89	73.8	5.1	316	2.28	1.34	71.18	#NULL!	#NULL!	8.2	#NULL!	19.5	13.9	0.16	35.85	59.8	无	1	2	2	0	1.2	72.49	4.32	62	58	54.5	64.25
1	刘树清	1	31	11.48	8.6	有	6	184	92.5	27.32	154	98	42.48	34.4	23.7	68.6	83.6	5.08	4.04	3.26	0.93	11.48	67.4	4.52	369.8	2.29	1.11	121.41	10.69	5.45428	8.6	#NULL!	12.35	14.04	0.18	59.45	49.73	无	1	1	1	0	1.25	78.27	1.81	57.6	58.95	45.75	62.45
1	侯文花	2	51	10.24	8.4	无	7	158	69	27.64	112	80	45.2	23.6	15.9	30.7	93.1	5.4	3.25	3.34	1.04	10.24	61.1	4.9	364.8	2.39	1.23	101.07	#NULL!	#NULL!	8.4	#NULL!	#NULL!	#NULL!	#NULL!	#NULL!	#NULL!	无	1	1	2	0	1.58	83.9	2.6	58.2	55.5	52.95	60.4
1	杨云	1	51	6.82	7	无	7	168	52	18.42	123	79	46.9	7.6	20.5	16.8	49.8	6.13	0.74	1.37	4.16	6.82	83.7	5.8	411.2	2.32	1.24	92.69	3.97	1.20335	7	#NULL!	25.61	12.44	0.26	27.91	36.1	无	2	2	2	0	1.34	90.58	3.56	60.6	57.65	47.7	59.15
1	赵勇军	1	45	9.34	6.5	无	7	178	86	27.14	137	91	44.4	32.7	21.3	32.1	64.9	4.92	3.86	3.29	0.84	9.34	98.1	6.07	304	2.33	1.02	79.78	#NULL!	#NULL!	6.5	18.56	18.34	15.9	0.07	46.54	21.19	无	1	2	2	0	1.5	82.94	2.05	57.45	58.5	43.3	59.95
1	高铁柱	1	40	7.68	8.7	无	7	174	86	28.41	117	71	40.8	158.4	107.6	90.8	65.5	5.51	3.44	3.82	0.82	7.68	63.8	4.6	357.3	2.21	1.2	116.58	7.57	2.58389	8.7	36.16	14.67	7.83	0.21	26.59	39.08	有	2	2	1	0	1.2	85.16	7.23	57.15	56.75	46.4	61.55
1	秦朋	1	34	11.88	9.4	无	7	180	91	28.09	119	77	46.5	77.1	44.9	35.3	113.1	3.38	3.99	2.23	0.59	11.88	66	4.9	267	2.24	0.82	119.91	14.94	#NULL!	9.4	31.55	24.27	10.52	#NULL!	#NULL!	28.77	无	1	1	1	0	1.56	119.7	1.2	57.7	59.85	46.7	59.75
1	董梅立	1	55	6.54	6.1	有	7	#NULL!	#NULL!	24.62	119	83	47.5	14.8	15.4	14.7	86.6	4.08	0.67	2.72	0.99	6.54	82	4.8	396	2.59	1.26	92.35	#NULL!	#NULL!	6.1	#NULL!	14.92	13.19	0.43	38.61	31.24	无	1	2	2	0	1.64	91.78	0.922	57	57	47	62.55
1	赵利山	1	33	8.74	10.6	有	7	180	95	29.32	136	82	40.2	43.7	30.5	32.7	76.2	4.77	2.26	3.07	0.8	8.74	66.4	3.8	403.1	2.15	1.27	120.46	6.91	2.68415	10.6	#NULL!	14.98	6.85	0.28	21.15	27.65	非增殖期	2	1	2	0	1.5	86.31	2.16	56.85	55.9	44.75	55.85
1	王立东	1	50	7.53	9.8	有	7	172	80	27.04	131	81	41.7	24	22.8	38.9	39.1	3.65	1.13	2.18	1.25	7.53	110.7	5.3	259.6	2.23	0.94	66.58	6.44	2.15525	9.8	#NULL!	13.49	10.5	0.24	29.4	49.56	有	1	1	2	0	1.44	76.42	1.71	52.35	51.3	43.55	59.05
1	叶梅	2	41	14.38	11.7	有	7	158	61	24.44	119	76	40.1	10.2	13.6	8.7	79.7	4.76	0.85	2.81	1.35	14.38	62.1	5.2	239.4	2.25	1.09	107.54	3.96	2.53088	11.7	#NULL!	20.69	8.87	0.15	37.11	43.64	有	1	1	2	0	1.16	90.32	4.25	61.4	56.1	48	51.9
1	谷亮	1	42	10.83	10.1	有	7	169	80	28.01	124	90	37.76	20.8	16.1	33	65.5	4.48	2.4	2.94	0.93	10.83	62.7	5.55	362.5	2.22	0.96	115.78	10.21	4.91441	10.1	#NULL!	21.42	8.28	0.22	21.01	20.13	有	1	1	2	0	1.66	91.61	0.761	62	57	46.5	62.1
1	马亚光	1	39	14.65	10.7	无	8	165	75	27.55	105	67	45.2	18.4	18.1	23.9	68	5.14	3.57	3.75	0.92	14.65	78.5	5.9	320	2.25	1.19	107.8	4.95	3.223	10.7	#NULL!	13.01	10.37	0.31	34.79	50.14	无	1	1	2	0	1.46	91.49	3.47	62.5	54.5	51	63.6
1	刘建国	1	70	5.77	6.3	无	8	165	70	25.71	169	83	43.1	35.5	38.9	38.1	69.4	5.9	1.41	1.53	3.71	5.77	85.6	5.4	467.6	2.32	1.04	78.94	12.33	3.16196	6.3	15.96	16.98	10	0.13	32.22	32.76	无	1	2	2	0	1.59	72.06	4.79	58.05	53.4	47.2	60.3
1	张壮军	1	46	6.98	7.3	有	8	170	85	29.14	106	73	43.5	24.5	21.4	25	72.1	4.37	2.85	2.85	0.89	6.98	80.8	3.5	232.7	2.26	1.29	100.25	89.68	27.8207	7.3	#NULL!	9.62	15.91	0.35	57.19	43.37	无	1	1	2	0	2.39	154.9	2.72	55.6	53.35	48.15	63.45
1	王兵海	1	56	12.88	10.4	有	8	165	80	29.38	161	89	45.2	15.4	10.6	22.1	113	5.67	13.01	2.95	0.58	12.88	75.2	5	251	2.29	1.34	97.38	5.87	3.36025	10.4	#NULL!	#NULL!	#NULL!	#NULL!	#NULL!	#NULL!	无	1	1	1	0	1.5	103.3	2.65	56.5	56.5	43.5	53.95
1	韩杰	1	50	7.62	7.9	有	8	178	98	30.39	146	103	40.7	16.6	16.9	36.7	73.6	5.28	2.74	3.66	0.97	7.62	83.8	4.5	396.3	2.24	0.93	93.28	25.29	8.56488	7.9	#NULL!	5.42	11.46	0.32	33.71	26.98	有	2	1	1	1	1.85	103.8	1.11	54.75	54.5	44.65	60.15
1	苗祥	1	32	10.46	7.9	无	9	182	100	30.49	137	72	42.9	39.2	27.1	81.5	82.5	5.26	7.92	2.97	0.94	10.46	66.4	4.7	569.8	2.41	1.43	121.3	#NULL!	#NULL!	7.9	#NULL!	16.86	6.61	0.18	24.77	25.05	无	1	1	1	0	1.52	93.2	2.62	58.35	56.3	44.05	58.35
1	段任江	1	55	7.6	6	有	9	173	95	31.74	147	84	40.7	16.4	22.4	19.4	50.1	4.59	0.61	2.92	1.28	7.6	75.07	6.58	356.47	2.22	0.9	98.13	#NULL!	#NULL!	6	#NULL!	19.85	11.35	0.29	30.22	46.51	无	2	2	2	0	1.47	88.53	1.71	62.4	57.35	45.85	53.4
1	李志亮	1	47	7.4	5.9	有	9	172	84	28.39	120	76	47.1	52.2	31.2	25.1	55.3	4.23	1.78	2.76	0.82	7.4	71.3	5.7	359.1	2.29	1.31	106.03	#NULL!	#NULL!	5.9	#NULL!	13.41	13.05	0.43	37.57	36.99	无	1	1	2	0	3.27	145.8	#NULL!	60	56.5	49.5	58.55
1	李桂茹	2	52	6.67	6.8	有	9	160	112	43.75	133	88	39.3	32.3	24.8	21.6	80.4	5.85	1.25	4.22	1.1	6.67	54.8	5.2	407.7	2.27	0.98	104.02	#NULL!	#NULL!	6.8	13.92	14.7	8.6	0.24	27.72	56.28	无	1	1	2	1	1.67	78.96	2.6	55.5	50	54.5	61.85
1	王金兰	2	54	13.32	10.8	有	9	155	66	27.47	130	66	41.9	16.2	19	33.9	69.4	5.49	0.92	1.49	3.76	13.32	49	4.2	243.2	2.33	0.93	106.39	8.71	5.15632	10.8	32.07	18.27	7.71	0.19	28.03	34.15	无	2	1	2	0	0.964	89.19	0.405	52.9	53.55	48.1	61.6
1	张丽叶	2	52	17.49	10.8	无	10	159	71	28	28.08	158	40	19.8	17.7	18.4	88.1	4.84	0.79	3.25	1.03	17.49	66.2	5.03	188.37	2.22	1.11	92.12	4.06	3.15597	10.8	#NULL!	21.3	12.96	0.25	44.1	56.7	无	1	1	1	0	1.23	91.14	2.52	54.8	52.65	46.15	66.35
1	郝连绪	1	52	15.75	9	无	10	170	80	27.68	127	87	43.49	16.8	14	37.5	106	5.22	1.76	3.6	1	15.75	84.6	6.35	240.9	2.21	1.01	90.86	2.14	1.498	9	#NULL!	15.26	17.28	0.22	53.2	39.61	有 非增值性	1	1	2	0	1.78	92.2	1.06	61.85	57.65	45	57
1	王济川	1	64	11.29	7.1	无	10	170	75	25.95	136	86	45.6	17.7	17.5	28.1	68.9	3.87	2.47	2.53	0.73	11.29	77.8	5.1	270.2	2.31	0.95	90.78	17.65	8.85638	7.1	36.57	25.24	16.05	0.37	29.55	58.66	无	2	1	2	0	1.57	100.3	1.95	54.35	51.85	43.9	55.85
1	孙俊兰	2	58	8.81	7.8	无	10	160	60	23.4	148	94	43.5	28.1	21.6	23.6	54.4	3.57	1.53	2.66	0.9	8.81	61.1	10.2	335	2.35	1.09	96.21	23.31	9.12716	7.8	30.02	18.83	10.95	0.18	22.61	47.94	无	2	1	2	0	1.63	103.5	1.13	53.8	54.3	43.9	57.4
1	王军	1	56	5.24	6.2	无	10	165	58	21.3	126	79	42.2	11.7	16.1	14.4	71.4	3.88	1.19	2.44	1.05	5.24	74.6	5.4	302.4	2.28	1.11	97.7	6.82	1.5883	6.2	16.35	21.95	23.41	0.73	67.15	40.87	无	2	2	2	0	1.79	113.7	2	56	63	53	50
1	杨艳勇	1	40	10.77	9.3	有	10	170	66	22.84	131	96	43.7	28.4	22.4	41.2	92	6.01	3.17	3.87	1.2	10.77	75.56	7.92	366.23	2.4	1.48	108.75	8.92	4.26971	9.3	#NULL!	25.77	11.61	0.73	39.61	31.64	无	1	1	2	0	0.972	81.64	2.12	61.1	59.3	45.6	52.15
1	孟亚明	1	37	7.65	10.4	有	10	162	69	26.29	123	93	39.3	47.1	31.6	48.9	82.9	4.51	3.53	3.09	0.96	7.65	80.7	4.6	284.9	2.24	1.28	106.84	4.92	1.6728	10.4	28.67	16.48	14.59	0.32	57.89	26.15	无	1	1	2	0	1.6	89.14	0.437	54.95	57.75	45.45	57.7
1	霍建森	1	46	9.67	7.6	有	10	169	94	32.91	123	86	47.5	25.5	21.1	46.1	64.3	6	4.78	4.13	0.95	9.67	68.5	4.4	468.9	2.61	1.53	108.52	17.86	7.67583	7.6	#NULL!	8.88	10.02	0.21	22.92	48.68	有	1	2	2	0	1	63.68	3.06	52.9	53.55	52.15	57.75
1	王军	2	71	7.38	7.1	有	10	165	100	36.73	148	82	38.04	16.8	18	20.9	81.8	3.64	1.46	2.28	0.89	7.38	78.9	5.53	355.6	2.19	1.22	65.2	#NULL!	#NULL!	7.1	#NULL!	17.59	12.6	0.16	60.94	48.61	无	1	1	2	1	1.33	78.99	3.06	53.5	55.5	46	57.75
1	郭彦平	2	59	4.55	6.4	有	10	164	60	26.03	87	53	45.3	27	32.2	37.1	59.3	4.68	2.07	2.99	1.18	4.55	76.5	7.9	338.4	2.42	1.25	73.63	#NULL!	#NULL!	6.4	#NULL!	20.51	18.17	0.54	39.9	39.48	无	1	1	2	0	1.54	99.31	6.37	54.95	57.3	46.55	61.85
1	许立群	1	54	8.05	8.2	有	10	180	86	26.54	135	81	40.8	33.9	25.4	43	86.1	3.87	1.68	2.65	0.9	8.05	77.5	3.6	427.5	2.28	1.17	97.52	7.46	2.66902	8.2	34.32	16.73	24.56	0.58	70.09	55.87	无	1	1	1	0	1.54	101.2	0.686	56	56.5	45	53.1
1	岳素君	2	56	14.8	10.5	有	11	166	82	29.76	139	86	41.6	31.6	23.9	17.9	94.5	4.52	1.69	2.59	1.37	14.8	65	5	408.4	2.46	1.27	91.57	16.87	11.0967	10.5	#NULL!	15.29	19.57	0.35	58.16	36.93	无	1	1	1	0	1.75	14.08	1.06	59.2	54.35	49.95	61
1	王润增	1	45	5.24	6.5	无	12	176	80	25.83	126	70	42.2	55.7	32.9	34.9	60.9	5.04	1.24	3.3	1.07	5.24	69.4	4.9	437.2	2.33	1.39	108.73	8.99	2.09367	6.5	36.51	20.54	13.31	0.27	33.98	34.99	无	1	2	2	0	#NULL!	#NULL!	#NULL!	57.35	55.2	46.2	59.65
1	冯克勤	1	51	7.44	5.7	有	12	178	89	28.09	157	91	48.7	19.2	17.6	77.3	59.1	4.25	1.84	2.47	1.26	7.44	65	5.51	355.6	2.36	1.12	107.09	#NULL!	#NULL!	5.7	12.77	18.01	8.59	0.32	29.89	77.97	无	1	1	2	1	1.46	78.82	2.39	55.35	57	45.35	63.4
1	苗树华	2	66	7.75	8.9	有	12	160	51	19.92	181	82	37.6	12.5	14.9	13.6	89.1	3.65	0.59	2.27	1.18	7.75	52.6	4.1	238.2	2.25	1.31	95.55	1.17	#NULL!	8.9	25.12	11.23	19.28	#NULL!	#NULL!	42.65	无	2	1	2	0	1.36	73.8	1.02	53.85	58.45	46.75	57.3
1	李春来	1	63	4.29	6.5	无	13	176	71	22.92	133	83	44.8	19.2	18.4	41.8	83.1	3.28	0.76	1.94	1	4.29	66.7	4.6	210.9	2.22	1.28	97.39	#NULL!	#NULL!	6.5	17.91	23.3	10.18	0.36	27.21	45.26	无	2	1	2	0	1.74	99.46	1.61	54.95	58.65	47.35	56.4
1	张克坚	1	56	9.06389	7.8	无	13	173	67	22.39	115	67	#NULL!	#NULL!	#NULL!		#NULL!	#NULL!	#NULL!	#NULL!	#NULL!	9.06	#NULL!	#NULL!	#NULL!	#NULL!	#NULL!	#NULL!	#NULL!	#NULL!	7.8	#NULL!	#NULL!	#NULL!	#NULL!	#NULL!	#NULL!	无	2	2	2	0	1.77	108.5	1.84	56.65	55.55	43.95	59.15
1	刘渝萍	2	65	6.85	8.3	无	13	159	67	26.5	129	70	39.86	23	15.3	20.1	102.1	5.87	4.05	3.82	1.07	6.85	53	4.38	211.5	2.29	1.15	95.99	13.97	4.25309	8.3	20.73	12.99	13.06	0.49	68.46	50.95	有	1	1	2	0	1.7	192.1	0.921	63.8	62.25	46.55	56.75
1	陈继明	1	64	9.06389	7.4	无	13	168	63	22.32	126	70	#NULL!	#NULL!	#NULL!		#NULL!	#NULL!	#NULL!	#NULL!	#NULL!	9.06	#NULL!	#NULL!	#NULL!	#NULL!	#NULL!	#NULL!	4.86	#NULL!	7.4	#NULL!	14.48	12.42	0.5	35.24	46.14	无	2	1	2	0	#NULL!	#NULL!	#NULL!	53.45	57.35	43.35	58.8
1	苗春青	1	55	5.09	6.5	有	13	172	77	26.03	139	70	38.1	20.6	20.3	21.9	69.5	4.56	1.44	2.95	0.9	5.09	71.8	3.4	202	2.06	0.88	99.95	9.04	2.04505	6.5	#NULL!	29.65	12.16	0.5	50.55	65.45	无	2	1	2	0	1.48	71.73	4.12	59.95	55.05	45.3	54.15
1	赵凤银	1	65	5.26	5.9	有	13	174	74	24.44	151	88	43.6	19	19.2	18.1	51.9	2.99	0.62	1.61	1.24	5.26	96.7	6.7	278.1	2.3	1.11	70.58	11.23	2.62532	5.9	15.73	39.58	8.86	0.22	24.52	43.79	无	2	2	2	0	1.32	90.9	0.448	59.8	59.8	48.8	58.75
1	杨爱文	1	48	10.97	7.8	有	13	170	77.5	26.82	140	99	47.9	28.6	20.8	48.9	78.8	4.43	1.84	3.23	0.82	10.97	80.3	7.4	262.7	2.31	1.12	99.54	#NULL!	#NULL!	7.8	#NULL!	15.51	11.83	0.43	33.89	42.73	非增值期	1	1	2	0	2.16	124	3.32	58.2	55	44.85	60.05
1	杜建萍	2	58	11.6	8.5	无	14	166	75	27.22	155	87	42	23.4	19.4	19.1	91.8	6.16	1.31	1.62	4.01	11.6	58.1	6	292.3	2.32	1.05	97.82	#NULL!	#NULL!	8.5	#NULL!	18.25	15.93	0.26	34.96	39.58	非增殖期	1	1	2	0	1.34	83.74	2.01	55.45	57.75	44.75	59.55
1	贺国友	1	54	6.5	8.6	有	14	173	74	24.73	116	71	41	17.4	15.8	22	52.9	2.85	1.27	1.64	0.85	6.5	68.96	3.02	335.97	2.29	1.09	102.33	#NULL!	#NULL!	8.6	#NULL!	#NULL!	#NULL!	#NULL!	#NULL!	#NULL!	有	1	1	2	1	1.8	119.5	3.43	53.65	55.75	45	55.35
1	王玉亮	1	60	3.94	8.6	有	14	190	95	26.32	163	84	42.45	16.3	12.4	19.1	68.1	5.05	1.08	3.34	0.89	3.94	100.9	8.16	280.1	2.28	1.23	69.42	8.71	1.52522	8.6	24.22	19.95	14.52	0.16	40.74	41.48	无	1	2	2	0	1.57	103.8	4.68	61	56.75	43.9	53.3
1	冯克刚	1	52	7.27	6.8	无	15	168	78	27.64	143	80	42.4	16.5	16.2	46.9	54.4	4.98	1.79	2.92	1.24	7.27	72.7	4.8	298	2.2	1.12	101.55	22.09	7.13752	6.8	#NULL!	10.37	14.07	0.5	42.76	45.61	无	1	2	2	0	1.28	58.04	1.15	61.35	357.35	52.1	57.6
1	赵英辉	2	43	5.96	6.4	无	15	163	61	22.96	108	73	39.8	13.1	14.9	17.7	37.3	4.78	0.72	2.79	1.47	5.96	65.9	4.4	342.3	2.27	1.22	98.67	8.88	2.35221	6.4	#NULL!	#NULL!	#NULL!	#NULL!	#NULL!	#NULL!	无	1	2	2	0	1.35	90	0.708	62.9	60.75	50.9	63.35
1	王大俭	2	77	7.95	7	有	15	165	77	28.28	170	90	43.8	22.1	34	50.7	135.7	4.68	0.93	2.95	1.32	7.95	68.3	5.2	268	2.24	1.15	74.42	5.6	1.97867	7	#NULL!	14.85	17.34	0.59	60.22	59.4	非增殖期	1	1	2	0	1.84	118.3	19.73	54.65	56.25	44.15	52.55
1	姜言军	1	58	6.84	6.9	有	15	183	75	22.4	112	72	43.1	24.6	26.3	39.4	66.3	4.4	0.98	2.63	1.2	6.84	79.8	5.1	247.8	2.22	1.08	93.7	16.86	5.12544	6.9	#NULL!	17.5	16.13	0.6	50.04	49.26	无	1	1	2	0	1.89	98.69	0.204	55.35	56.95	47.35	62.4
1	董艳茹	2	61	11.29	10.8	有	15	150	51	22.67	181	89	39.3	28.1	19.6	26.9	111.2	5.68	0.72	2.07	3.18	11.29	65.7	5.7	332.9	2.25	1.34	87.27	6.75	3.387	10.8	#NULL!	17.37	20.73	0.42	49.88	41.27	无	2	1	2	1	1.6	88.52	1.89	60.5	58.5	49.5	57.9
1	杨庆辉	1	56	4.95	6.2	无	16	172	62	20.96	111	77	39.12	9.4	10.4	11.7	70.8	5.38	1	3.77	1.05	4.95	76.3	6.81	332.2	2.2	1.16	96.8	3.33	0.7326	6.2	20.54	14.8	13.35	0.24	27.04	32.86	无	1	2	2	0	1.44	90.27	2.63	64.05	60.7	43.9	57.2
1	陈荣秀	2	70	8.09	6.7	有	16	153	50	21.36	143	65	44.8	17.8	22.6	12.1	83.5	6.02	1.14	3.71	1.78	8.09	68.8	4.4	291.9	2.5	1.4	77.48	#NULL!	#NULL!	6.7	#NULL!	15.15	25.54	0.6	56.78	61.59	无	1	2	2	0	1.36	92.03	3.63	59.4	51.25	46.8	51.7
1	任凤志	1	53	6.75	7.3	有	16	175	71	23.18	172	99	39.1	14.5	18.2	15.3	52.5	3.64	1.89	2.33	0.79	6.75	59.9	4.74	249.1	2.15	1.1	109.2	4.95	1.485	7.3	#NULL!	9.4	0.04	15.99	10.12	0.2	有	1	1	2	0	1.32	71.14	2	60.05	55.6	44.95	55.1
1	董贵玲	2	66	6.1	8.6	有	17	156	60	24.65	155	99	40.69	16.7	12.9	14.3	87.4	6.39	2.01	4.38	1.06	6.1	61.9	4.59	308.28	2.31	1.64	90.57	#NULL!	#NULL!	8.6	#NULL!	12.06	16.7	0.42	55.51	30.8	有	1	2	2	0	1.1	89.51	3.34	54.35	59.2	46	58.6
1	赵英建	1	59	5.39	6.1	有	17	168	59	20.9	135	79	45.5	20.2	19.5	13.6	76.3	3.63	0.7	2.14	1.32	5.39	72	5.1	304.4	2.36	1.17	97.05	2.36	0.565351	6.1	#NULL!	14.18	10.68	0.28	56.78	43.7	非增殖期	2	1	2	0	2.41	82.92	1.36	62.7	58.15	46.95	60.15
1	李丹丹	2	37	6.55	9.4	无	18	160	68	26.56	116	74	42.7	24.8	21.6	31.1	84.5	4.04	1.57	2.57	0.97	6.55	54.1	4.5	231.16	2.25	1.37	116.06	#NULL!	#NULL!	9.4	#NULL!	12.2	13	0.4	47.71	47.83	无	2	1	2	0	1.24	75.97	1.33	56.45	56.85	54.4	65.8
1	李烨	2	50	5.34	7.4	无	18	163	59	22.21	110	73	38.9	11.7	18.1	15.2	72.4	5.1	0.57	3	1.74	5.34	68.4	4.2	139.9	2.05	0.99	89.82	#NULL!	#NULL!	7.4	#NULL!	#NULL!	#NULL!	#NULL!	#NULL!	#NULL!	无	2	1	2	0	1.34	81.7	0.614	60	61.15	48.35	60.3
1	王金凯	1	70	5.95	8.1	有	18	175	82	27.72	147	78	40.2	11.3	18.3	32.732.7	126	4.04	1.2	1.13	2.57	5.95	72	4.6	240.2	2.23	0.79	89.86	#NULL!	#NULL!	8.1	#NULL!	19.5	17.02	0.55	52.31	52.18	无	1	2	2	0	2.15	108.8	1.31	64	57	44.5	55.7
1	马建武	1	51	6.38	8.84177	无	19	174	79	26.09	145	84	43	28.2	30.6	108.7	61.3	6.25	1.73	1.35	4.07	6.38	72.3	4.8	376.7	2.25	1.09	102.5	#NULL!	#NULL!	8.8	#NULL!	27.42	9.04	0.14	19.88	48.95	无	1	2	2	0	1.57	74.26	4.12	67	57.5	49	62.05
1	褚碧章	1	79	8.01	11	有	19	167	75	26.89	152	78	37.4	10.8	14.5	18.5	75.7	2.64	0.54	1.53	0.97	8.01	125.1	9.68	349.3	2.21	1.13	46.19	1.08	0.38448	11	#NULL!	8.6	15.17	0.04	40.06	33.33	有	2	1	2	冠心病 稳定型心绞痛	1.03	89.37	0.349	54.7	60.75	48	56.45
1	鲁国梁	1	66	3.87	10.1	无	20	178	74	23.4	142	77	37.9	9.8	24	12.5	50.8	4.46	0.68	1.21	3.02	3.87	78.2	6.6	337.4	2.41	0.76	89.34	3.66	0.62952	10.1	35.12	26.61	13.09	0.19	19.63	26.05	无	2	1	2	0	1.51	70.46	2.46	53.6	54.95	43.85	52.4
1	何三民	1	66	5.25	7.6	无	20	170	63	21.8	146	77	38.5	11.9	17.1	25.5	63.8	4.93	0.99	0.82	3.77	5.25	71.1	3.9	254.4	2.19	1.01	92.89	4.88	1.13867	7.6	24.77	13.41	10.12	0.3	22.76	47.92	无	2	1	2	0	1.55	94.57	2.97	59.65	52.3	47.6	54.95
1	张旭芳	1	55	10.34	8.9	无	20	170	75	25.95	164	89	48.1	16.8	16.5	31.6	61.2	4.7	3.68	0.85	3.11	10.34	88.7	7.6	421.1	2.46	1.07	84.02	46.63	21.4291	8.9	23.2	14.31	9.29	0.29	26.6	43.2	非增殖期	2	1	2	0	1.46	106.2	1.21	55.25	53.6	51.7	61.8
1	王志庭	1	58	10.17	8.7	无	20	172	80	27.04	131	75	40.8	17.9	17	17.9	67.2	4.72	3.35	3.46	0.75	10.17	85.7	6.7	305.5	2.29	0.97	86.25	11.09	5.01268	8.7	36.13	32.1	15.73	0.32	49.84	59.79	无	2	1	1	0	1.16	61.72	1.89	52.95	53.85	44.2	56.35
1	周忠义	1	59	10.43	8.1	有	20	178	89	28.09	125	72	44.7	33.9	22.9	47.5	69.1	4.9	3.46	3	0.81	10.43	84.7	7.5	337	2.38	1.07	86.38	#NULL!	#NULL!	8.1	#NULL!	#NULL!	#NULL!	#NULL!	#NULL!	#NULL!	有	1	1	2	0	1.78	129.9	2.12	53.55	54.25	43.95	57.9
1	邹世华	1	73	4.89	6.3	有	20	170	73.3	26.26	150	85	43.1	11.9	23.5	163.1	109.1	3.43	0.96	2	1.14	4.89	80.6	5.5	255.3	2.25	1	83.13	12.8	2.78187	6.3	#NULL!	26.63	10.65	0.26	33.51	36.53	无	2	1	2	0	1.49	85.86	1.57	59	54.35	44.25	50.95
1	陈造平	1	67	7.27	8.4	有	20	172	78	26.37	169	82	40.5	17.1	18.1	21	60.9	5.35	0.88	3.42	1.13	7.27	80.4	4.9	356.7	2.42	1.18	86.97	3.38	1.09212	8.4	#NULL!	26.92	9.79	0.28	34.35	24.74	无	1	2	2	0	1.57	76.45	1.11	60	55	44.5	55.4
1	荣军	1	62	12.53	8.9	无	21	170	85	29.41	144	96	42	25.9	19.5	27	97.3	4.02	0.72	1.17	2.4	12.53	74.5	6.4	214	2.36	1.1	93.7	11.07	6.16476	8.9	#NULL!	19.89	16.15	#NULL!	42.59	50.53	有	1	2	1	0	1.88	130.7	1.99	60.45	56.4	47.35	63.75
1	杜艳华	2	60	13.7	12	无	25	165	59	21.67	153	98	37.8	18.8	23.1	24.6	139.8	6.09	1.05	1.27	4.32	13.7	57.5	2.7	217.8	2.43	1.26	96.79	#NULL!	#NULL!	12	#NULL!	16.58	37.57	0.91	122.2	34.99	非增殖期	2	1	2	0	1.09	86.15	2.38	55.6	54.6	46.9	54.5
1	孟战表	1	72	8.31	7.8	有	30	174	73	24.11	135	75	40.5	20.3	16.8	24	119.3	2.95	1.07	0.94	1.84	8.31	84.8	6.7	272.9	2.29	1.19	78.73	15.22	5.62125	7.8	#NULL!	19.95	10.54	0.15	25.92	21.92	有	1	1	2	1	1.63	79.99	1.11	53	54.25	46.55	57
2	张爱民	1	46	12.92	10.8	无	0.01	170	90	31.14	140	94	44.4	48.6	34.3	72.2	85.6	4.98	1.79	0.93	3.61	12.92	70.7	4.8	322.6	2.35	1.23	107.15	#NULL!	#NULL!	10.8	#NULL!	#NULL!	#NULL!	#NULL!	#NULL!	#NULL!	无	1	1	2	0	1.46	67.33	2.41	55	52.95	43.7	62.15
2	赵永海	1	44	18.83	9.5	有	0.01	170	89	30.8	142	83	42.2	17.9	17.4	19	91.3	3.54	1.52	2.41	0.8	18.83	67.5	4.3	314.8	2.22	0.92	110.75	14.16	11.8503	9.5	41.66	18.93	18.83	0.43	50.29	42.68	有	1	1	2	0	1.45	92.98	1.35	44	46.95	39.55	54.6
2	李彦荣	2	45	17.77	10.8	有	0.02	168	70	24.8	134	95	46.3	20	19	43.3	91.8	6.5	3.5	4.26	1.4	17.77	63	3.7	195	2.39	1.13	102.79	14.46	11.4202	10.8	#NULL!	17.46	8.09	0.27	23.69	64.57	无	2	1	2	0	1.38	81.53	2.7	60.1	53	42.65	62.35
2	张栋才	1	73	6.83	9.7	有	0.02	178	71	22.41	124	77	39.4	16.2	49.2	25.2	87.9	4.61	0.65	3.11	1.23	6.83	71.94	6.29	213.77	2.21	1.07	88	10.47	3.17823	9.7	#NULL!	15.8	11.72	0.3	33.24	46.73	无	1	1	2	0	1.34	87.99	3.5	55.55	52.35	37.1	57.7
2	焦彦虎	1	46	13.65	13.4	有	0.02	172	76	25.69	120	76	36.2	10.4	13.2	11	133.2	3.55	1.8	0.56	2.44	13.65	67.2	6.3	438	2.12	0.92	109.41	9.21	5.5874	13.4	31.04	14.96	15.77	0.34	41.97	25.93	非增殖期	2	1	2	1	1.58	82.5	1.45	44.3	46.3	40.7	45.8
2	闫明拴	1	46	12.52	8.84177	有	0.05	#NULL!	80	27.68	106	70	38.2	9.9	11.5	15.6	94.6	5.8	1.63	4.04	0.93	12.52	71.5	5.4	174.8	2.26	1.16	106.63	8.78	4.88558	8.8	#NULL!	31.82	13.47	0.58	35.31	26.46	无	2	1	1	0	1.11	74.9	1.05	54.15	48.9	38.8	56.8
2	张兰利	1	55	5.74	9.7	有	0.09	178	67	24.36	176	121	36.62	21	18	42.1	91.4	4.76	2.31	3.15	1.01	5.74	72.9	5.03	339.79	2.24	1.1	99.32	#NULL!	#NULL!	9.7	#NULL!	20.45	10.64	0.51	35.66	45.08	无	1	2	2	0	1.43	83.87	1.71	59.3	54.65	42.85	59.85
2	刘伟	1	47	12.81	11.2	有	0.1	175	85	27.76	126	85	42.7	26.2	29.6	54.3	89.8	4.76	2.49	3.5	0.81	12.81	93.2	5.9	402.6	2.29	0.89	83.66	15.15	8.6254	11.2	38.26	17.28	14.53	0.51	28.59	80.44	无	1	2	1	0	1.3	91.91	1.44	53.1	52.7	44.05	62.85
2	薛恃峰	1	35	11.25	12.3	有	0.1	170	85	29.41	123	75	38.1	20.6	16.4	30.3	81	5.44	1.75	0.9	3.94	11.25	63.3	3.8	423.6	2.17	1.46	121.14	13.35	6.675	12.3	#NULL!	13.01	15.73	0.6	53.42	43.02	无	1	1	2	0	1.35	68.72	1.8	50.15	53.4	45.9	58.05
2	程远英	2	55	17.3	12.4	有	0.1	157	58	23.53	157	107	45.8	16.7	19.6	34.1	157.5	6.72	2.53	4.19	1.22	17.3	57.3	5.2	217.3	2.41	1.08	100.36	9.65	7.41978	12.4	#NULL!	13.05	14.01	0.43	42.01	46.52	有	1	1	2	0	1.35	88.2	3.18	45.25	45.5	38.15	45.8
2	党晋云	1	66	10.47	13.9	有	0.11	174	84	27.74	162	94	38.2	28.5	29.4	27.2	77	5.45	1.32	1.37	3.81	10.47	77.5	4.4	268.8	2.41	1	89.65	4.2	1.9544	13.9	45.76	16.64	10.37	0.36	35.97	45.07	无	1	1	2	0	1.68	108.2	4.09	47.4	48.9	39	45.95
2	彭建菊	2	56	16.38	13	有	0.2	157	65	26.37	104	65	40.5	32.3	31.2	28.5	72.1	3.96	0.81	2.74	0.97	16.38	64.1	5.6	277.2	2.32	1.23	93.06	5.38	3.91664	13	#NULL!	14.68	10.86	0.3	44.94	30.67	非增值期	1	1	2	0	1.38	82.56	2.94	54.35	53.35	47.25	62.7
2	王贵荣	1	77	12.48	12.5	有	0.2	159	65	25.71	115	63	36.2	14.9	26.9	14.6	48.1	2.46	2.29	1.26	0.67	12.48	92	7.6	286.5	2.29	0.92	68.88	#NULL!	#NULL!	12.5	#NULL!	16.92	6.55	0.12	22.19	20.28	无	2	1	2	0	1.27	79.99	3.61	53.4	54.95	36.85	48.55
2	王建刚	1	60	9.71	14	有	0.2	176	76	25.18	128	73	36.1	25.3	30.1	14.4	81.1	3.6	1.61	2.14	0.8	9.71	101.1	7.1	367	2.29	1.29	69.25	18.51	7.98809	14	#NULL!	#NULL!	#NULL!	#NULL!	#NULL!	#NULL!	无	1	2	2	1	1.06	91.91	2.01	47.85	47.25	41.7	44.75
2	贾超	1	30	8.67	11.8	有	0.3	183	95	28.37	134	91	38.7	29.1	25.2	79.2	96.9	5.35	4.23	3.36	0.96	8.67	60.24	6.52	455.91	2.24	1.72	128.05	#NULL!	#NULL!	11.8	#NULL!	12.78	11.67	0.39	41.92	67.16	无	1	1	1	0	1.77	80.69	2.33	54.25	54.6	42.05	62.95
2	于彦辉	1	48	5.45	6.5	有	0.3	172	108	36.51	125	74	43	20.5	16.5	51.1	117	4.29	1.31	1.01	2.94	5.45	79.8	6	407.4	2.28	1.25	100.52	29.51	7.14798	6.5	12.93	23.3	9.15	0.19	28.96	52.01	无	2	2	1	0	1.3	65.8	1.52	57.35	55.95	46.1	55.75
2	王立明	1	38	5.6	10.5	有	0.4	158	76	30.44	151	106	38.9	43	40.4	56.9	103.7	3.67	1.62	2.33	0.86	5.6	66	4.1	248.4	2.26	1.13	116.59	13.12	3.26542	10.5	#NULL!	22.15	16.26	0.78	52.33	51.88	无	1	1	1	0	#NULL!	0	1.49	56	54	45.5	62
2	王忠阳	1	29	8.1	14.6	有	0.5	175	117	38.2	167	118	42.4	26.2	23.5	25.7	131.5	6.04	2.11	3.88	1.04	8.1	74.7	5.2	402.8	2.42	1.44	118.04	5.21	1.8756	14.6	#NULL!	#NULL!	#NULL!	#NULL!	#NULL!	#NULL!	无	1	2	1	0	1.41	90.26	4.31	50.95	52.1	39.9	55.45
2	王昌法	1	45	10.69	10.1	有	0.6	172	107	36.17	135	95	47.42	33.7	28	38.2	107.1	5.98	2.78	3.75	1.17	10.69	83.4	5.58	493.6	2.47	1.15	97.11	#NULL!	#NULL!	10.1	24.47	25.62	11.44	0.39	33.62	58.07	无	1	2	1	0	1.64	86.02	1.74	61.65	53.65	43.9	63.6
2	姚保然	2	52	16.77	12.4	有	0.6	167	61	21.87	159	81	42.5	18.7	16.6	23.4	99.6	5.97	1.32	1.17	4.15	16.77	58.3	7.2	221.7	2.45	1.21	101.94	3.4	2.53413	12.4	#NULL!	12.69	19.83	0.93	68.54	43.37	无	1	1	2	0	1.3	87.62	1.76	57.65	46.1	43.45	53.65
2	郭三平	1	56	11.33	10.6	有	1	175	95	31.02	138	73	39.9	11.1	12.3	17.9	48.7	4.18	0.7	2.77	1.36	11.33	76.2	6.7	204	2.24	1.18	96.84	8.81	4.43632	10.6	#NULL!	16.58	20.9	0.45	43.21	33.12	无	1	1	2	1	1.76	115.1	1.38	54.15	52.3	41.5	56.1
2	韩军基	1	50	10	8.84177	有	1	178	90	28.41	111	78	41.4	19	17.9	18	93.4	4	6.62	0.54	2.39	10	78	8.2	186.8	2.14	1.14	100.05	#NULL!	#NULL!	8.8	#NULL!	10.09	17.93	0.44	68.94	30.24	无	1	1	2	0	1.3	106.1	0.624	57	56	42	53.35
2	张建菊	2	53	9.13	7.1	有	1	165	73	26.81	146	89	43.6	46.5	31.1	33.5	61.7	5.21	5.35	3.42	0.86	9.13	62.4	6.2	415.6	2.38	1.29	98.25	19.1	7.75036	7.1	35.26	21.4	18.82	0.72	58.74	38.78	无	2	1	2	0	1.26	91.43	3.02	57	55.05	44.7	57.3
2	马振华	1	42	19.94	12.5	有	1	168	65	23.03	96	73	42.6	38.9	30.3	55	91.6	4.66	1.07	3.4	0.95	19.94	81.3	6.2	370.6	2.37	1.21	102.25	3.38	2.99543	12.5	#NULL!	12.76	12.18	0.3	28.26	33.25	无	1	1	2	0	3.61	111.3	0.426	55.3	54.7	39.8	53.55
2	常玉荣	2	58	6.02	7.8	无	1	113	75	27.06	113	75	44.8	37.8	34.6	39.9	129.2	5.58	1.56	3.64	1.29	6.02	74.5	5.29	453.6	2.32	1.17	76.56	#NULL!	#NULL!	7.8	#NULL!	16.12	27.1	0.57	83	62.02	无	1	2	2	0	1.81	102.8	3.06	61.8	63.8	46.4	65.35
2	徐宁	2	56	6.87	7	无	1	166	75	27.22	108	69	41.1	114.2	66.9	75.2	100.5	6.55	1.42	4.46	1.28	6.87	69.4	3.8	322.1	2.32	1.48	84.66	9.77	2.98311	7	#NULL!	10.98	15.21	0.44	40.02	26.55	无	2	2	2	0	1.6	78.22	9.2	64.8	54.6	50.5	59.45
2	张珠峰	1	33	12.95	9.9	有	1	181	100	30.52	147	111	44.6	38.5	37.1	75	136.5	5.39	2.58	3.41	0.99	12.95	81.8	4.38	404.3	2.47	1.04	108.12	#NULL!	#NULL!	9.9	#NULL!	16.66	10.99	0.44	37.6	70.23	无	1	1	1	0	1.73	120.4	2.8	54.2	54.8	39.9	58.7
2	林田雨	1	28	9.06389	8.84177	有	1	183	88	26.28	135	84	#NULL!	0	#NULL!		#NULL!	0	#NULL!	#NULL!	#NULL!	9.06	#NULL!	0	#NULL!	0	#NULL!	#NULL!	4.09	#NULL!	8.8	#NULL!	16.54	9.29	0.38	29.71	29.67	有	1	1	2	0	1.99	94.78	1.37	51	59	41.5	52.3
2	史俊河	1	49	5.64	9.8	有	1	178	80	25.25	135	85	39.9	15.9	13.4	28.3	109.9	4.53	0.96	2.67	1.1	5.64	82.9	8.1	415.2	1.16	0.93	95.1	4.14	1.03776	9.8	#NULL!	10.89	15.58	0.54	31.94	51.45	无	2	1	2	0	1.75	107.1	2.05	51.5	54	43	52.15
2	任建国	1	63	5	9.2	有	1	175	80	26.12	115	63	34.3	20.3	16.6	26.9	62.3	3	0.68	1.73	0.93	5	135.7	9	407.2	2.25	1.25	47.5	3.95	0.877778	9.2	#NULL!	#NULL!	#NULL!	#NULL!	#NULL!	#NULL!	有	2	1	2	0	3.38	82.61	0.364	47.25	45.75	#NULL!	53
2	刘海正	1	57	7.45	5.5	有	2	170	79	27.34	151	89	45.4	34.7	51.7	63.9	56	5.22	1.43	3.15	1.43	7.45	73.8	2.6	314.8	2.33	1.34	97.45	#NULL!	#NULL!	5.5	#NULL!	16.34	16.05	0.54	50.54	37.11	无	2	2	2	0	2.18	99.94	1.49	53.35	57.6	42.3	45.65
2	崔卫江	1	47	8.62	7.5	有	2	181	75	22.9	103	64	43.6	29.5	23.8	74.9	52.4	4.7	2.53	3.22	0.97	8.62	70.8	4.2	393	2.33	1.18	106.33	4.96	#NULL!	7.5	#NULL!	22.38	11.32	#NULL!	#NULL!	42.45	无	1	1	2	0	1.89	102.5	2.55	59.45	58.9	41.55	50.55
2	翁桂岚	2	74	4.56	6.2	有	2	150	47	20.89	124	54	41	10.4	19.2	14.1	51.8	6.37	0.62	1.45	4.28	4.56	67.4	4.6	322.6	2.32	1.3	77.23	#NULL!	#NULL!	6.2	#NULL!	27.66	17.03	0.6	52.38	34.12	无	2	2	2	0	1.43	84.16	1.19	58.5	57.5	52	58.8
2	李明廷	2	52	10.79	6.7	有	2	160	68	26.56	118	88	45.3	11.6	12.8	54.6	95.2	5.88	1.02	3.74	1.21	10.79	49.8	4.4	401.6	2.51	1.44	107.34	13.04	6.2534	6.7	#NULL!	16.63	17.65	0.51	49.82	25.61	无	2	1	2	0	2.07	131.6	2.51	49.5	48	39	50
2	王素英	2	66	30.7	10.1	有	3	168	0	#NULL!	185	102	43.1	14.5	16.5	20.5	113.4	6.58	1.42	3.99	1.52	30.7	61.2	3.9	305.4	2.5	1.31	90.91	10.91	14.8861	10.1	#NULL!	15.16	14.4	0.37	35.49	43.09	无	2	1	2	0	1.32	103.7	0.916	56.5	56	45	50.2
2	邱玉生	1	56	6.39	8.6	有	3	183	82	24.49	112	78	35.2	41.8	48.7	199.7	73.7	5.72	2.54	0.91	3.94	6.39	68.1	4.2	302.6	2.16	1.17	101.43	#NULL!	#NULL!	8.6	#NULL!	#NULL!	#NULL!	#NULL!	#NULL!	#NULL!	无	1	2	2	0	2.04	95.75	1.73	57.5	53.5	46	59.1
2	安晓莉	2	40	6.67	8.8	无	3	156	64	25	135	88	42.4	23.4	20.9	47.2	89.6	3.91	1.35	0.92	2.6	6.67	64.8	4.5	476.1	2.26	1.28	102.84	#NULL!	#NULL!	8.8	#NULL!	14.81	12.49	0.25	30.16	61.04	无	1	1	2	0	1.37	91.95	2.49	57.1	61.65	46.35	67.9
2	柳明长	1	57	15.57	13.1	无	3	169	72	25.21	113	57	35.6	8.2	10.3	24.3	64.9	4.52	1.36	0.98	3.21	15.57	76.4	4	193.3	2.15	1.22	96.08	7.46	5.16232	13.1	#NULL!	12.29	15.11	0.38	42.19	32.77	无	1	1	2	0	1.49	78.55	1.32	52.4	51.5	43.4	58.3
2	刘亚东	2	28	7.73	7.4	有	3	160	66	25.78	126	83	40.4	25	17.2	17.5	68.3	3.34	1.38	0.9	3.18	7.73	49	4.6	344.9	2.23	1.33	127.71	18.37	6.31112	7.4	#NULL!	#NULL!	#NULL!	#NULL!	#NULL!	#NULL!	无	1	1	2	0	1.76	99.92	1.89	50.15	56.05	44.05	57.2
2	石军	1	47	14.76	10.2	有	3	175	82	27.08	120	80	42	24.4	16.4	38.3	68.9	4.3	1.46	3.12	0.91	14.76	74.1	4.3	216.7	2.17	1.05	104.36	16.96	#NULL!	10.2	28.31	23.45	14.86	#NULL!	#NULL!	26.89	无	1	1	1	0	1.71	106.8	1.08	54.85	53.3	41	55.6
2	史灵先	2	64	10.69	7.7	有	3	148	60.5	27.62	176	97	41.7	11	17.8	18.6	103	8.71	8.09	4.81	1.02	10.69	97.2	12.91	354.2	2.46	1.15	53.25	#NULL!	#NULL!	7.7	#NULL!	#NULL!	#NULL!	#NULL!	#NULL!	#NULL!	有 非增值性	2	1	2	0	0.976	80	5.68	57.5	55.5	43.5	62.2
2	雷兰勤	2	68	8.35	8.1	有	3	166	75	27.22	113	78	43.7	20.8	23	62.3	125.3	6.28	2.49	4.51	1.17	8.35	73.2	4.2	223.7	2.34	1.26	72.91	22.76	8.44649	8.1	#NULL!	10.52	20.82	0.4	46.95	36.62	无	1	2	2	0	1.46	74.33	4.61	47.95	55.05	47.9	57.9
2	李占元	1	68	10.43	9.3	有	3	172	60	20.28	157	96	#NULL!	0	#NULL!		#NULL!	0	2.01	#NULL!	#NULL!	10.43	#NULL!	0	#NULL!	0	#NULL!	#NULL!	4.43	2.05355	9.3	#NULL!	13.31	25.88	0.95	88.71	35.53	有	2	1	2	0	1.53	119.2	1.11	51.7	48.9	37.75	47.25
2	穆红政	1	41	6.59	8.2	有	3	172	85	28.73	162	102	37.2	44.7	30.3	32.4	44.9	4.36	2.41	2.83	0.71	6.59	78	5.4	241.3	2.17	1.02	106.56	#NULL!	#NULL!	8.2	#NULL!	#NULL!	#NULL!	#NULL!	#NULL!	#NULL!	有	2	1	2	0	1.39	78.58	3.68	46.45	46.2	43.6	54.3
2	李大领	1	64	6.11	7	有	3	173	93	31.07	122	82	40	12.3	17.1	27.3	35.3	5.3	0.73	3.51	1.22	6.11	69.32	5.47	327.1	2.33	1.21	95.19	105.4	28.622	7	#NULL!	22.4	14.42	0.37	61.89	53.35	无	1	1	2	0	1.6	97.4	2.05	56.4	47.75	46.8	#NULL!
2	梁成栓	1	61	6.2	5.6	有	4	175	95	31.02	144	79	42.6	16.2	37.8	164.2	79.3	2.57	1.12	1.31	1.08	6.2	59.8	2.5	460	2.32	1	103.28	#NULL!	#NULL!	5.6	#NULL!	12.98	13.05	0.27	33.23	54.14	无	1	2	2	0	1.69	88.45	4.11	52.8	54.05	37.65	49.7
2	刘秀珍	2	74	7.35	8	有	4	155	64	26.64	134	84	41.4	11.1	15.7	17.5	76.1	3.36	1.36	2.13	0.95	7.35	61.1	6.1	275.9	2.35	1.17	85.99	17.29	5.64807	8	#NULL!	15.28	22.78	1.04	83.37	61.36	非增值期	2	2	2	0	1.64	79.98	2.72	59.6	54.05	47	53.3
2	周吉阳	1	38	7.56	9.8	有	4	180	90	27.78	172	100	43.9	15.9	14.9	17.5	71.3	5.57	4.19	3.76	0.82	7.56	130	6.9	330.5	2.23	1.21	59.66	#NULL!	#NULL!	9.8	#NULL!	#NULL!	#NULL!	#NULL!	#NULL!	#NULL!	有	1	1	2	0	1.39	105.2	0.964	48.35	55.05	40.45	55.05
2	韩金花	2	55	3.71	9.4	有	4	156	51	20.96	129	85	30.8	27.1	66.3	163.4	361.8	5.23	1.21	3.44	1.24	3.71	52.9	4.86	197.8	2.19	1.52	103.03	#NULL!	#NULL!	9.4	53.44	15.4	15.3	0.42	40.2	13.83	无	2	1	2	0	1.26	105.8	0.707	46.4	48.35	39.95	52.3
2	董新民	1	64	14.53	9.8	有	5	176	95	30.67	121	76	42.5	38.2	24.1	48.6	76.2	4.04	2.81	0.88	2.62	14.53	77.5	5.5	466.1	2.38	1.29	90.91	19.97	12.8962	9.8	#NULL!	28.58	8.77	0.15	30.44	25.75	糖网病？	2	1	2	2	2.13	91.82	1.77	56	53	43.45	53.8
2	岳文峰	1	48	7.56	7.9	有	5	185	105	30.68	133	100	38.5	40.3	38.6	155.8	82.2	4.8	2.67	2.99	0.87	7.56	57.8	2.7	348.8	2.25	1.03	114.75	10.01	3.36336	7.9	#NULL!	20.02	10.62	0.67	32	45.36	无	2	1	1	1	1.34	109.4	1.48	54.25	53.4	37.85	53.2
2	宋玉梅	2	67	12.58	7.5	有	5	160	68	26.56	161	105	37.1	11.9	11.3	18.4	74.8	3.49	0.63	1.04	2.11	12.58	166.1	12.6	322.7	2.29	1.29	27.26	#NULL!	#NULL!	7.5	#NULL!	#NULL!	#NULL!	#NULL!	#NULL!	#NULL!	有（现无）	2	1	2	0	1.13	83.2	4.38	61.35	49.3	45.95	55
2	贾文海	1	52	10.97	8.84177	有	5	177	92	29.37	136	91	37.4	18	14.7	34.8	95.5	5.39	1.92	3.75	0.83	10.97	62.6	5.12	425.8	2.26	1.35	108.01	6.03	2.93996	8.8	#NULL!	15.89	14.1	0.17	37.56	41.58	无	1	1	2	0	#NULL!	0	#NULL!	52.15	50.35	39.95	44.95
2	孟秀荣	2	51	16.07	10.2	有	5	176	80	25.83	130	90	44.2	11.7	10.1	14	70.9	5.1	1.93	3.59	0.98	16.07	51.8	6	204.9	2.2	1.09	106.73	3.58	2.55692	10.2	#NULL!	13.83	11.88	#NULL!	#NULL!	35.14	有	1	1	2	0	1.4	86.94	1.6	52.95	50.3	38.15	58.35
2	王林	1	60	9.63	7.5	有	5	172	72	24.34	156	78	#NULL!	0	#NULL!		#NULL!	4.38	0.87	2.64	1.28	9.63	78	4.8	326.2	0	#NULL!	93.27	#NULL!	#NULL!	7.5	#NULL!	6.11	9.13	0.22	58.21	27.26	增殖期	1	2	2	1	1.55	103.5	5.05	47.45	53.15	39.65	43.6
2	王瑞雪	1	67	5.63	7.7	有	6	172	75	25.35	133	88	44.6	12	22.6	18.8	55.9	4.6	0.81	2.92	1.23	5.63	94.5	5.5	282.9	2.31	0.81	71.51	#NULL!	#NULL!	7.7	#NULL!	17.14	11.12	0.18	19.98	58.63	无	2	1	2	2	1.17	91.43	2.74	54.5	58.6	46.05	54.55
2	史冬菊	2	66	9.06389	8.84177	有	6	150	60	26.67	122	81	#NULL!	0	#NULL!		#NULL!	0	#NULL!	#NULL!	#NULL!	9.06	#NULL!	0	#NULL!	0	#NULL!	#NULL!	#NULL!	#NULL!	8.8	#NULL!	22.7	16.3	0.64	74.88	27.12	无	1	1	2	0	#NULL!	0	#NULL!	61.3	53	43.15	55.55
2	李风芹	2	76	9.78	8.9	有	6	155	70	29.14	117	75	44.3	15.3	19.7	20	88.6	5.43	6.09	3.47	0.91	9.78	79.9	9.3	355	2.43	0.74	62	13.71	5.95928	8.9	#NULL!	12	15.9	0.31	34.88	49.44	无	2	2	2	1	1.42	101.5	2.32	62.75	56.45	46.6	47.6
2	夏秀会	2	62	9.06389	11.5	有	6	153	69	25.2	138	86	#NULL!	0	#NULL!		#NULL!	0	#NULL!	#NULL!	#NULL!	9.06	57	3.19	#NULL!	2.24	#NULL!	#NULL!	3.34	#NULL!	11.5	37.63	16.25	7.42	0.5	21.58	18.6	有	2	1	2	0	#NULL!	0	#NULL!	56.35	51.3	43.3	57.15
2	周跃琴	2	80	12.92	7.7	有	6	163	77	28.98	163	87	43.6	20.5	21.8	15.5	70.4	5.04	1.39	3.4	0.96	12.92	88.4	9.1	344.6	2.62	1.37	52.6	28.81	16.5433	7.7	#NULL!	14.05	13.6	0.2	35.83	18.7	无	1	2	2	0	1.73	100.9	1.94	55	48.5	47.5	51.15
2	郑斌	1	37	5.91	9.1	有	6	174	53	17.51	134	91	40.1	12.4	41.6	343.9	95.1	3.89	0.6	2.29	1.17	5.91	51.6	4.5	321.7	2.33	1.27	129.91	#NULL!	#NULL!	9.1	#NULL!	#NULL!	#NULL!	#NULL!	#NULL!	#NULL!	无	2	1	2	0	1.4	79.62	2.37	50.3	50.5	39.3	54.65
2	李保恒	1	55	6.25	8.7	有	7	101	178	31.88	133	84	39.82	3.1	7.4	15.9	80.4	5.49	1.77	3.51	1.25	6.25	75.9	5.79	397.12	2.34	1.49	97.69	14.24	3.95556	8.7	#NULL!	18.31	14.73	0.24	29.96	39.46	无	1	1	1	0	1.3	74.86	0.452	56.75	57.15	42.8	62.2
2	张志香	2	66	16.33	15	有	7	158	47.5	19.03	87	63	31.7	7.2	11.7	17.4	42.6	9	2.23	5.84	1.42	16.33	48.3	3.8	299.2	2.03	1.13	98.27	#NULL!	#NULL!	15	#NULL!	11.52	7.43	0.35	33.14	20.14	无	2	1	2	0	0.675	66.55	2.59	48.45	54.45	40.65	52.15
2	芦洪梅	2	32	8.29	12.1	有	7	165	68	24.98	123	82	38.66	19.9	21.3	21.6	63.1	5.6	5.73	3.21	0.94	8.29	45.9	2.68	389.8	2.25	1.17	126.89	2.07	0.76268	12.1	32.6	#NULL!	#NULL!	#NULL!	#NULL!	#NULL!	有	2	1	2	0	1.3	78.92	1.14	44.65	50.85	38.05	55.65
2	田立新	1	49	9.45	10.1	有	7	170	78	26.99	142	101	43.1	11.9	14.2	16.5	111.4	4.6	0.76	3.2	0.95	9.45	71.9	11.76	265.6	2.34	1.21	104.17	14.2	5.964	10.1	24.78	18.75	26.33	0.21	92.38	37.47	无	1	2	2	0	1.69	106.4	0.936	50.5	48.5	40	54.6
2	姚武华	1	56	9.13	8.7	有	8	#NULL!	75	24.49	135	96	43.1	28.5	17.6	22.1	93.4	4.77	1.99	3.33	0.85	9.13	65.5	4.9	247.7	2.28	1.15	103.06	7.35	2.98247	8.7	#NULL!	13.84	11.45	0.41	45.25	48.77	无	2	2	2	0	1.43	103.8	1.2	54.8	53.1	42.8	54.2
2	丁国造	1	67	10.5	10.2	无	8	170	80	27.68	143	77	46.3	21.3	18.3	30.6	111.2	5.14	1.69	3.73	0.99	10.5	83.3	6.5	315.9	2.35	1.05	83.37	14.29	6.66867	10.2	#NULL!	32.31	8.45	0.18	27.12	30.83	无	2	1	2	0	2.37	100.1	2.37	53.95	54.15	45.65	62.8
2	刘彦霞	2	34	11.81	8.84177	有	8	160	65	25.39	116	79	37.39	43.8	34.8	99.4	89.5	12.55	16.64	0.97	2.2	11.81	52.9	4.82	183.8	2.26	0.96	119.41	6.23	3.27006	8.8	#NULL!	13.32	5.68	#NULL!	17.4	22.84	无	1	1	1	0	0.827	63.3	1.78	56	56.7	47.05	58.6
2	耿本府	1	74	6.57	6.8	有	8	170	76	26.3	107	70	39.2	16.1	15.4	17.7	31.6	3.99	1.4	2.85	0.83	6.57	84.1	4.3	324	2.33	1.36	78.41	9.83	2.87036	6.8	#NULL!	11.46	10.24	0.22	32.14	31.37	无	2	2	2	0	1.24	86.57	1.34	53.8	54.7	42.4	52.85
2	李香瑞	2	65	11.59	11	有	8	165	62	22.77	141	66	40.7	13.5	14.5	17.1	77.2	7.68	2.43	5.25	1.06	11.59	46.2	3.2	148.9	2.32	1.08	100.42	2.88	1.48352	11	#NULL!	8.96	8.3	0.36	39.87	64.77	无	1	2	2	0	1.32	77.12	2.82	52.2	52.95	38.5	54.9
2	李进志	1	57	8.12	8.1	有	8	176	92	29.7	112	82	41.8	27.3	18.4	36.3	56.9	5.58	1.26	3.66	1.17	8.12	100.2	7.8	455.1	2.4	1.28	71.5	11.99	4.32706	8.1	#NULL!	#NULL!	#NULL!	#NULL!	#NULL!	#NULL!		2	1	2	0	1.38	103.9	1.51	46.35	48.75	40	57.05
2	李丰	1	48	13.65	9.9	有	8	160	69	26.95	140	86	42.2	20.6	26.9	28.8	64.5	6.5	1.87	1.13	4.42	13.65	77.2	4.7	330.7	2.39	1.18	101.9	#NULL!	#NULL!	9.9	#NULL!	13.66	9.88	0.11	24.39	22.81	有	1	1	2	0	1.76	92.84	2.32	46.95	48.1	45.25	46.4
2	刘宝玉	1	38	14.34	9.7	有	9	171	90	30.78	146	102	44.4	52	29.3	40.8	121.6	4.13	2.9	2.71	0.77	14.34	67.1	5.52	291.3	2.23	1.13	115.8	#NULL!	#NULL!	9.7	#NULL!	8.02	13.32	0.54	44.98	63.4	有	2	2	1	0	1.99	97.9	4.28	55.7	53.7	39	55.5
2	刘秀琴	2	69	7.46	10.8	有	9	158	55	22.03	140	67	40.5	21.9	21	13.4	96.1	3.56	1.05	2.31	1.15	7.46	72.5	5.5	321.4	2.29	1.38	73.24	#NULL!	#NULL!	10.8	37.42	19.37	18.68	0.43	41.31	51.67	有	2	2	2	0	1.56	96.81	1.78	54.65	48.65	44.5	58.7
2	严军	1	42	3.07	8.5	有	9	180	75	23.15	111	73	43.2	13.9	14.7	24.8	102.8	4.77	2.62	3.09	0.99	3.07	63.65	6.38	213.01	2.31	1.23	115.06	#NULL!	#NULL!	8.5	#NULL!	19.56	12.9	0.49	46.11	41.77	无	1	1	2	0	1.17	92.59	0.876	47.25	56.5	36.45	50.65
2	李同瑞	1	53	6.28	8.4	有	9	176	65	20.98	127	84	29.6	16.1	21.6	24.1	91.7	4.67	1.33	1.12	3.35	6.28	84.8	6.3	244.8	2.14	1.06	0	1.12	0.312604	8.4	20.76	15.31	14.39	0.33	52.06	30.9	有	2	1	2	0	1.38	81.38	2.53	46	51.5	38.5	50
2	王存生	1	62	8.15	9.7	有	9	178	55	17.36	104	59	36.7	23.9	25.5	13.1	102.3	4.38	1.06	1.17	3.14	8.15	53.3	6.4	234.9	2.26	1.04	107.51	1.69	0.612156	9.7	34.21	15.12	14.24	0.35	69.24	44.48	无	1	2	2	0	1.63	106.5	4.6	40.6	45.15	31.25	42.4
2	胡树军	1	73	7.41	7.6	有	10	170	73	25.26	124	73	31.5	87.6	65.5	70.3	92.5	3.22	0.78	0.67	2.17	7.41	212.8	12.4	488.5	2.14	0.96	25.7	#NULL!	#NULL!	7.6	#NULL!	14.38	26.86	0.66	69.83	39.89	无	2	1	2	0	1.38	95.09	1.02	51.1	51.75	44.55	57
2	贾彦芳	2	59	7.54	9.6	有	10	158	56	22.43	154	81	41.3	14	19.1	18.5	76.6	3.81	1.45	2.29	1.11	7.54	64.55	5.22	418.7	2.36	1.44	90.42	#NULL!	#NULL!	9.6	#NULL!	21.52	15.51	0.49	39.9	46.24	无	1	1	2	1	1.81	112.3	1.97	64.05	55.85	45.25	58.05
2	李立丹	2	79	7.61	6.7	有	10	155	57	23.73	138	74	43.9	17.9	25.2	27.8	65.7	9.18	1.8	6.37	1.37	7.61	80.2	6.2	526.9	2.39	1.21	60.39	10.11	3.41943	6.7	20.68	15.47	18.62	0.41	49.53	32.78	无	2	2	2	0	1.5	96.43	4.34	58.9	61.8	50.8	55.7
2	王彦蒲	2	64	7.16	7.6	有	10	164	91	33.83	135	88	38.7	40.4	24.9	40	98.8	5.85	1.23	3.98	1.51	7.16	61.6	6.6	255.1	2.22	1.51	92.01	13.3	4.23236	7.6	#NULL!	14.64	25.55	0.71	76.91	34.7	无	2	2	2	0	1.64	104.8	3.43	53.4	57.05	44.85	55.95
2	栗伟	1	56	6.95	7.3	有	10	175	76	24.82	137	83	39.3	15.8	14.7	63.5	74.9	5.58	1.71	1.05	4.08	6.95	101.6	6.7	379.2	2.34	1.18	70.84	8.78	2.71204	7.3	17.56	9.86	21.42	0.39	65.73	62.64	非增殖期	1	1	2	0	1.86	112.8	1.19	58.05	53.8	42.2	54.5
2	张明山	1	69	5.69	12.3	有	10	170	60	20.76	109	72	29.7	8.2	12.6	12.3	133.2	3.61	1.01	2.3	0.71	5.69	75.3	7	171	2.2	1.21	88.83	#NULL!	#NULL!	12.3	#NULL!	10.56	4.69	0.51	31.22	24.55	无	2	1	2	0	1.35	96.01	2.17	56.55	53.95	38.4	59.15
2	贾桂英	2	75	10.89	8.3	有	10	160	70	27.34	120	63	44.5	8.3	15.9	20.6	58.6	6.57	1.86	1.53	4.29	10.89	79.3	6.2	204.4	2.34	1.27	63.01	11.83	5.72572	8.3	26.82	22.8	7.67	0.27	19.12	39.47	非增殖期	2	1	2	0	1.3	98.52	3.1	50.5	47.5	39	54.9
2	姜兴起	1	68	6.26	7.2	有	10	170	90	31.14	155	71	38.1	25.3	20.7	29.3	60.6	4.7	1.76	3.56	0.8	6.26	93.5	7.2	262.7	2.22	1.14	71.95	12.17	3.38596	7.2	#NULL!	22.85	14.32	0.52	47.63	53	有	2	2	1	0	1.03	72.33	1.14	53.55	51.95	40.55	53.7
2	罗习书	2	49	9.22	12.8	有	10	160	75	29.3	148	100	38	23.5	41.5	36.2	86	4.53	6.49	2.62	0.97	9.22	73.4	10.1	399.9	2.32	1.66	83.04	2.18	#NULL!	12.8	#NULL!	16.33	9.95	#NULL!	#NULL!	31.89	有	1	1	2	0	1.53	102	2.14	54.75	46.35	44.15	61.2
2	卜玉祥	2	74	5.98	7.2	有	10	156	60	28.76	180	81	33	37.3	26.2	21.2	87.8	3.67	0.87	2.06	1.15	5.98	171.5	11.4	359.6	2.11	1.64	24.97	#NULL!	#NULL!	7.2	#NULL!	7.55	47.41	1.41	171	38.9	非增殖期	2	1	2	0	1.31	86.58	1.45	56.3	57.05	39.6	47.4
2	刘彩丽	2	66	9.46	9.5	有	10	163	67	25.22	131	75	38.6	15.1	13.7	19.3	82.8	4.25	0.93	2.77	1.07	9.46	68.2	3.6	198	2.3	1.2	80.51	8.21	3.45185	9.5	#NULL!	5.53	11.4	0.4	40.33	27.38	有	1	1	2	0	1.4	90.74	3.86	58.85	48.25	41.75	50.6
2	伊桐生	1	80	5.86	6.4	有	10	160	55	21.48	114	66	37.6	5.2	11.9	11.1	40.2	2.5	0.97	1.36	0.9	5.86	75.4	5.1	501.9	2.25	1	63.34	#NULL!	#NULL!	6.4	17.93	10.7	21.27	0.86	58.96	29.23	无	2	2	2	1	1.12	114	1.55	43.2	41.3	36.7	50.15
2	武成梅	2	57	11.49	10.4	有	10	158	75	30.04	173	96	32	8.9	12.5	11.6	60	4.06	0.79	2.72	0.75	11.49	70.3	3.6	133.8	2.23	1.31	82.66	3.31	1.69031	10.4	#NULL!	11.96	11.37	0.31	32.07	26.48	有	1	1	2	0	1.41	103.2	4.32	46.4	55.2	37	48.55
2	贾云改	2	66	7.91	8.9	有	10	158	58	23.23	123	76	40.7	9.4	13	11.8	93.6	4.32	1.14	2.86	1.02	7.91	179.5	14.1	338.4	2.46	1.21	25	6.81	2.39409	8.9	38.08	17.02	30.84	0.9	84.54	26.1	无	2	1	2	0	1.03	77.63	2.17	48	45.35	38.9	46.15
2	任德忠	1	55	8.07	12.6	有	10	167	60	21.51	153	89	39.2	13.1	19.8	23.4	69.6	4.4	0.97	2.92	0.99	8.07	67.18	5.97	293.84	2.33	1.35	102.72	#NULL!	#NULL!	12.6	#NULL!	12.06	11.25	0.33	39.13	27.09	有	2	1	2	1	1.62	102.2	2.05	49.35	52.5	#NULL!	42.8
2	徐承红	1	64	7.02	10.3	无	10	170	60	20.76	112	66	37.3	21.8	22.8	118.3	124.2	3.77	1.38	2.33	0.95	7.02	130.5	19.3	630.1	2.26	1.34	49.45	#NULL!	#NULL!	10.3	#NULL!	6.61	16.67	0.36	81.24	84.53	非增值期	2	1	2	2	1.32	82.62	1.98	42.25	46.15	35.6	#NULL!
2	董龙宝	1	57	4.61	6.5	有	11	181	79	24.11	126	77	39.8	15.6	16.4	12.1	100.7	3.33	0.53	2.31	0.86	4.61	58.9	4.3	271	2.17	1.33	106.92	#NULL!	#NULL!	6.5	#NULL!	13.7	26.88	0.95	108.3	69.54	无	2	2	2	0	1.83	106.1	0.806	53.05	53.15	40.25	55.9
2	李金需	2	60	7.03	10.7	有	11	156	65	26.71	127	65	43.1	18.5	19.9	30.5	95.8	6.28	0.98	3.86	1.54	7.03	579	5.6	254.6	2.36	1.29	96.57	5.26	1.64346	10.7	#NULL!	13.17	19.08	0.39	61.14	46.01	非增值期	1	1	2	0	1.32	74.06	3.53	44.55	48.15	43.15	47.2
2	卢新瑞	2	72	10.83	10.9	有	12	158	60	24.03	165	84	39.9	10	15	18.7	57.2	3.89	1.14	1.19	2.34	10.83	62.3	3.8	147.8	2.24	1.11	86.14	5.73	2.75804	10.9	#NULL!	15	16.13	0.41	42.07	41.32	非增殖期	2	1	2	1	1.42	88.04	2.47	52.2	50.4	44.2	54.9
2	张雪芬	2	63	8.31	8.2	有	12	164	75	27.89	131	81	44.8	18.9	22.3	17.1	69.3	7.5	1.19	5.79	1.36	8.31	95.3	6.7	391.2	2.49	1.56	54.92	6.8	2.51147	8.2	#NULL!	11.65	18.84	0.32	58.71	51.91	无	1	1	2	0	1.3	98.27	7.16	58.5	54.5	46.5	57.9
2	胡乃丽	2	55	6.69	9.1	有	12	169	74	25.91	136	80	40.1	13.2	15	14.9	68	4.45	1.37	2.82	0.88	6.69	43.8	5	444.2	2.26	1.37	109.67	8.45	2.51247	9.1	25.18	25.36	14.32	0.35	40.25	49.27	有	1	1	2	0	1.39	96.67	2.48	55.45	52.75	39.95	60.6
2	万方	2	35	8.15	9.7	有	12	165	55	20.2	124	82	37.3	9.4	18.7	48.7	46.7	6.43	11.22	2.88	0.25	8.15	53.1	2.8	262	2.04	1.08	118.43	9.81	3.5534	9.7	#NULL!	6.34	5.61	0.15	19.35	56.29	有	1	2	2	0	1.31	89.98	4.02	48.2	54.05	37.2	40.9
2	温文法	1	62	4.63	6.1	有	12	170	64	22.15	96	58	39.3	4.4	19.2	13.8	61.9	3.65	2.01	0.86	2.23	4.63	81.8	4.9	308.1	2.26	1.23	88.22	3.34	0.687298	6.1	#NULL!	24.4	14.23	0.65	40.6	32.25	无	2	2	2	1	1.39	102	2.49	48.45	45.7	36.6	40.5
2	陈三顺	1	77	5.52	7.4	有	13	165	71	26.08	140	70	41.4	17.1	24.9	20.2	65.6	4.58	1.43	1.35	2.66	5.52	67.2	4.6	207.3	2.49	1.27	87.98	#NULL!	#NULL!	7.4	#NULL!	12.13	18.03	0.61	49.78	41.82	无	2	2	2	1	1.72	99.1	3.3	54.5	49.7	43.2	56.8
2	李满红	1	67	8.75	8.5	有	13	173	80	26.73	131	83	40.8	13.7	14.3	24	78.7	3.98	2.7	2.51	0.88	8.75	71.88	5.64	295.01	2.19	1.17	91.82	3.9	1.51667	8.5	#NULL!	22.65	12.88	0.21	33.74	24.34	非增值性	2	1	2	0	1.54	86.67	2.84	52.35	51.5	41.45	43.4
2	冯志新	1	52	9.88	9.1	有	13	173	70	23.39	126	82	37.1	63.7	97.7	1193.3	26.8	5.16	1.32	1.17	3.7	9.88	55.4	2.9	270.8	2.2	0.77	113.55	3.96	1.73888	9.1	24.27	12.76	8.58	0.43	97.99	27.73	非增殖期	2	1	2	0	1.07	83.92	1.58	40.3	42.6	36.6	43.3
2	阎上游	1	59	6.11	7.4	有	14	178	107	33.77	129	74	41.2	15	17.7	32.7	66.2	4.03	8.02	0.83	2.2	6.11	#NULL!	3.9	92.68	2.47	1.38	1.5	#NULL!	#NULL!	7.4	#NULL!	20.36	9.23	0.11	27.89	22.49	无	1	1	1	1	1.5	92.68	1.5	59.05	55.15	46.35	58
2	闫向上	1	54	12.15	8.9	有	14	174	109	36	158	96	44.75	52.6	39.1	71.7	80.1	6.36	3.4	4.19	1.33	12.15	69.4	5.78	307.6	2.45	1.34	102.07	19.77	10.6758	8.9	24.5	20.14	9.91	0.18	32.05	20.61	无	1	2	1	0	1.16	68.1	1.91	56.2	54.75	46.05	61.95
2	陆凤英	2	68	7.01	10.6	有	15	162	81	30.86	129	69	38.3	12.1	14.1	18.2	60.2	5.2	3.25	0.88	3.58	7.01	61.3	5.5	283	2.28	1.35	89.59	11.7	3.6452	10.6	24.58	22.64	16.29	0.23	46.7	24.17	无	1	1	1	0	1.53	91.48	1.76	56	52.5	45	52.15
2	耿文胜	1	69	7.52	8.7	有	15	174	90	29.73	155	97	42	23.2	21.3	30.4	68.2	2.96	1.36	1.74	0.8	7.52	77.1	6.4	254	2.26	1.49	87.97	#NULL!	#NULL!	8.7	#NULL!	18.63	11.36	0.29	41.71	31.71	无	1	2	1	0	1.83	88.68	1.8	52.8	56.9	42.05	55.2
2	赵聪明	1	69	10.98	10.3	有	15	178	92	29.04	155	87	38.3	11.1	12.5	14.4	71.6	4.05	1.32	0.94	3.03	10.98	77.1	6.1	230.4	2.26	1.08	87.96	#NULL!	#NULL!	10.3	#NULL!	#NULL!	#NULL!	#NULL!	#NULL!	#NULL!	非增殖期	1	1	2	1	#NULL!	0	#NULL!	51.65	51.2	37.35	47.5
2	涂桂英	2	61	7.73	7.7	有	15	150	60	26.67	163	92	44.59	20.1	16.3	21.4	64.4	5.38	1.06	3.29	1.56	7.73	59.2	5.61	197.5	2.33	1.32	95.19	10.45	3.59016	7.7	22.68	14.38	10.37	0.22	39.59	51.33	无	1	2	2	0	1.38	93.89	3.47	65.4	55.5	47.4	55.7
2	倪广义	1	71	9.37	7.6	有	15	167	78	27.64	152	78	37.7	14.1	20.5	35.5	81.7	2.73	1.08	1.6	0.84	9.37	94.4	7.04	335.7	2.24	0.97	69.68	#NULL!	#NULL!	7.6	#NULL!	20.61	14.26	0.3	28.7	51	无	1	2	2	0	1.57	78.06	5.74	59.65	53.25	41.05	56.7
2	周年锁	1	61	7.87	7.5	有	15	174	82	27.08	130	71	38.54	16.8	17.4	36.9	69	4.55	1.13	2.94	0.8	7.87	75.3	5.17	230.3	2.31	1.37	93.97	#NULL!	#NULL!	7.5	#NULL!	25.36	7.55	0.22	41.31	23	有	1	1	2	0	1.41	102.2	1.25	52.4	51.45	38.4	49.15
2	刘占京	1	66	11.63	8.5	有	15	170	67	23.18	146	89	40.5	28.5	20.4	33	108	6.05	1.18	4.07	1	11.63	70.8	8.1	227	2.26	1.04	93.05	#NULL!	#NULL!	8.5	#NULL!	8.94	8.13	0.24	28.92	52.06	无	2	1	2	0	1.44	98.76	2.25	58.8	57.05	40.45	57.8
2	申胜芹	2	67	10.86	9.6	有	15	160	68	26.56	167	103	38.2	4.6	12.8	13.8	87.9	3.88	3.03	0.81	2.47	10.86	79.6	5.3	448.3	2.28	1.08	#NULL!	#NULL!	#NULL!	9.6	#NULL!	10.72	17.35	0.74	41.57	50.62	非增殖期	1	2	2	0	1.22	106.4	1.08	53.5	49	40	54.5
2	高梅庭	2	70	9.11	10.3	有	15	160	70	27.34	142	80	37.8	36.4	29.5	25.9	90.5	3.87	1.97	2.73	0.83	9.11	62.8	4.1	357.6	2.1	0.97	86.52	14.23	#NULL!	10.3	25.52	12.38	22.66	#NULL!	#NULL!	59.75	无	2	1	2	1	1.29	88.28	3.16	58.65	51.4	43.15	56.2
2	赵运其	1	79	8.19	8	有	15	175	85	27.76	135	78	39.1	19.9	11	28.2	69	4.52	1.52	3.11	0.69	8.19	103	7.3	293.1	2.29	1.37	58.44	#NULL!	#NULL!	8	#NULL!	20.13	11.57	0.22	43.73	34.04	无	1	2	2	0	1.3	99.97	1.85	49	53	44	51.05
2	马国才	1	78	5.97	7.9	有	15	#NULL!	0	#NULL!	146	74	37.7	19.4	19.1	13.3	87.9	2.62	0.71	1.69	0.78	5.97	112.5	9	298.6	2.24	1.01	53.61	4.48	1.18869	7.9	40.73	6.54	26.49	0.69	81.53	56.01	有	2	1	2	0	1.3	63.1	1.84	49	43	#NULL!	40.9
2	汤五群	2	74	9.91	10.3	无	16	153	48	20.5	128	80	38.3	10.9	15.1	18.9	60.8	4.44	0.87	0.15	2	9.91	51.3	4.81	256.2	2.41	1.12	91.1	#NULL!	#NULL!	10.3	#NULL!	13.91	8.43	0.29	30.3	67.27	有	2	1	2	1	0.816	42.94	4.91	53.15	50.9	46.2	53.75
2	高伟	1	38	7.37	7.5	有	16	170	80	27.68	120	83	45.3	20.1	19.3	41.9	85	5.28	1.37	3.27	1.26	7.37	74.9	5.9	350.8	2.38	1.07	110.68	7.09	2.32237	7.5	18.94	12.32	15.99	0.45	72.74	63.17	非增殖期	1	2	2	0	2	115.5	2.63	53.1	53.45	46.15	51.8
2	张文革	1	52	19.06	11.4	有	16	175	76	24.82	157	103	42.7	21.6	18.9	36.6	112.8	6.13	1.62	3.78	1.32	19.06	73.4	5.4	303.2	2.31	1	101.15	11.07	9.37752	11.4	#NULL!	11.67	8.71	0.34	27.22	56.02	非增值期	1	1	2	0	2.02	103.5	0.987	52.75	49.15	43.45	53.25
2	高生元	1	68	4.91	7.6	有	16	163	67	25.22	#NULL!	0	39.2	24.6	22	16.5	56.4	2.4	0.92	1.62	0.71	4.91	93.2	7.3	297.2	2.19	1.31	72.27	9.47	2.06656	7.6	43.67	16.96	14.73	0.55	31.24	35.42	无	1	2	2	1	1.5	100.5	1.81	54.5	50.35	40	55.25
2	袁朝辉	1	49	14.96	12.4	有	16	181	90	27.47	120	86	37.93	13.4	12	16.8	65.4	5.22	1.8	3.46	1.02	14.96	70.2	7.26	370.68	2.15	1.34	105.22	5.54	#NULL!	12.4	#NULL!	15.97	9.48	0.34	34.84	32.62	有	1	1	2	0	1.21	77.12	1.87	51.15	55.05	39.85	54.9
2	李双所	1	59	8.3	7.6	有	18	175	74	24.16	139	75	41.8	17.7	16.8	13.2	99	2.75	1.87	1.9	0.75	8.3	78.5	4.2	340.8	2.29	0.93	93.67	2.85	1.05133	7.6	#NULL!	#NULL!	#NULL!	#NULL!	#NULL!	#NULL!	增殖期	2	1	2	0	1.55	69.27	2.02	53	53.05	39.25	50.2
2	郝福珍	2	66	14.17	9.9	有	18	157	45	25.56	106	63	39.8	37.8	34.2	10	96.9	6.28	1.54	3.7	1.68	14.17	64.4	6.4	209.5	2.48	0.94	86.29	#NULL!	#NULL!	9.9	#NULL!	9.43	12.13	0.36	36.19	71.14	无	2	2	2	0	1.01	89.43	2.12	54.5	54.5	41	47.55
2	吴焕之	1	71	6.73	11	有	18	168	64	22.68	96	45	28.1	8.2	12.8	27.6	75.3	5.53	0.9	3.53	1.14	6.73	121.3	10.9	361.7	2.01	1.12	51.43	#NULL!	#NULL!	11	#NULL!	3.83	11.84	0.4	47.09	36.55	有	2	1	2	0	1.08	106.6	0.736	44.6	43	34.5	#NULL!
2	王淑敏	2	66	27.06	12	有	19	155	93	38.71	147	86	36.6	21.6	20	26.7	81.8	5.44	1.24	1.25	3.63	27.06	128	12.1	563.7	2.34	1.34	37.62	28.71	34.5286	12	40.11	15.28	12.1	0.33	28.92	53.43	无	2	1	1	1	1.37	92.62	1.86	57	56.5	46	52.4
2	顾成学	1	67	16.85	9.9	无	20	170	64	22.15	105	55	#NULL!	0	#NULL!		#NULL!	0	#NULL!	#NULL!	#NULL!	16.85	#NULL!	0	#NULL!	0	#NULL!	#NULL!	13.29	9.95273	9.9	#NULL!	30.16	6.34	0.11	16.8	28.43	有	2	1	2	0	1.09	85.92	1.96	47.2	46.65	38.2	52.15
2	常文德	1	74	6.71	7.2	有	20	178	78	24.62	170	74	34.1	17.9	18.6	24.7	99.2	4.16	0.56	2.78	0.89	6.71	129.6	13	541.8	2.26	1.22	46.5	5.43	1.61935	7.2	21.76	30.49	13.29	0.17	0.17	23.84	无	2	2	2	0	1.48	90.46	11.48	52.65	50.2	40.4	48.65
2	王振英	2	80	21.22	16	有	20	160	49	19.14	122	71	34.5	17.1	19.6	19.2	97.2	5.23	1.52	1.09	3.8	21.22	81.4	7.1	199	2.42	1.08	58.97	#NULL!	#NULL!	16	#NULL!	#NULL!	#NULL!	#NULL!	#NULL!	#NULL!	非增殖期	2	1	2	0	1.45	106.8	3.66	45.95	49.3	39.7	0
2	陈秀兰	2	69	14.64	8.2	有	20	162	67	25.53	160	78	40.4	24.9	35.8	42.9	88.7	5.48	5.61	0.69	3.07	14.64	123.6	9.1	296.1	2.47	1.33	38.43	28.73	18.6937	8.2	#NULL!	10.62	13.76	0.25	40.52	28.88	有	2	1	1	1	1.57	153	0.553	54.1	53.2	43.35	57.75
2	赵桂更	2	79	7.97	7.2	有	20	158	48	19.23	145	67	38.9	8.6	18.9	15.3	73	6.78	0.65	2.06	4.13	7.97	65	4.5	319.5	2.32	1.23	77.91	#NULL!	#NULL!	7.2	24.16	12.42	26.26	0.52	63.65	68.55	无	1	2	2	2	1.07	75.89	2.97	52.15	57.35	50.15	56.55
2	闫玉卓	2	58	4.59	7.4	有	20	158	67	26.84	140	83	43.2	68.9	61.2	27.6	51.4	5.51	1.24	3.51	1.66	4.59	66	6.1	337.3	2.29	1.45	88.71	#NULL!	#NULL!	7.4	#NULL!	28.24	17.77	0.54	50	32.03	无	2	1	2	0	1.87	79.53	3.02	64.65	64.7	51.55	63.5
2	刘仕忠	1	72	9.79	9	有	20	170	74	25.61	126	68	40.2	11	20.6	17	66.3	4.77	2.11	3.09	0.88	9.79	73.8	5.2	257.1	2.19	1.04	87.72	4.81	2.09288	9	27.13	19.8	14.7	0.36	46.64	40.37	有	2	1	2	0	0.931	66.35	4.62	52.6	52.65	37.65	48.25
2	魏国振	1	78	7.85	8.8	有	20	172	65	21.97	150	83	37.5	17.4	27.3	33.7	112.8	3.13	0.55	1.95	0.92	7.85	58.4	2.9	206.2	2.08	1.38	92.57	2.05	0.715222	8.8	31.17	19.23	15.79	0.51	62.44	36.75	无	2	2	2	1	1.43	113.4	1.43	50.75	51	46.15	50.85
2	李建民	1	55	3.39	8.2	有	20	168	70	24.8	138	83	38.2	11.8	139	15.5	66.4	4.65	1.3	3.31	0.95	3.39	93.7	7.63	327.7	2.24	1.34	78.63	#NULL!	#NULL!	8.2	23.16	12.64	12.26	0.65	36.08	103.1	未查	2	1	2	0	1.33	72.05	0.707	53.95	58.4	38.05	52.95
2	吴义文	1	62	7.87	6.1	有	20	180	75	23.15	166	91	44.7	12.6	19.9	14.3	105.6	3.5	2.53	2.16	0.92	7.87	85.9	6.4	310	2.24	0.93	83.16	#NULL!	#NULL!	6.1	#NULL!	12.03	14.57	0.3	33.14	71.77	有	2	1	2	0	1.69	79.52	2.5	59.25	53.9	43.5	50.8
2	刘国际	1	59	5.27	8.4	有	20	70	70	26.67	#NULL!	79	42.16	11.5	16	19.3	111.2	6.25	1.25	4.63	0.97	5.27	226	13.81	404	2.26	1.58	26.37	#NULL!	#NULL!	8.4	23.08	8.18	31.53	0.25	84.92	127.3	有	2	1	2	2	1.35	74.38	4.86	52.5	52	47	51.55
2	王金华	2	71	10.09	8.8	有	20	162	70	26.67	155	81	41.7	8.6	12.2	12.1	75.6	4.78	4.47	0.95	3.37	10.09	68.1	6.5	322.5	2.34	1.2	77.93	24.78	11.1125	8.8	24.42	12.34	18.04	0.46	37.29	32.03	无	1	1	2	0	1.39	74.95	3.16	50.5	48.95	40.3	58.75
2	沈志英	2	68	8.85	10.8	有	20	159	77	30.46	130	72	44.2	14.4	19.2	19.4	85.7	4.75	1.75	3.22	1.1	8.85	82.2	6.8	427.8	2.4	1.2	63.37	98.44	38.7197	10.8	32.14	14.97	11.52	0.16	33.57	35.12	有	1	1	2	1	1.39	92.99	8.17	52	51.95	40.05	51.6
2	张友生	1	73	5.23	10	有	20	168	62	21.97	118	65	41.8	70.2	36.9	53.2	95.4	4.26	1.4	2.82	1.12	5.23	71.2	4.4	321.7	2.31	1.37	88.38	#NULL!	#NULL!	10	#NULL!	17.8	7.87	0.3	21.45	35.67	无	2	1	2	0	1.31	82.03	1.95	48.55	53.4	35.65	44.35
2	付玉伶	2	55	4.33	11.6	有	20	170	70	24.22	98	63	37.39	33.6	21.1	18.5	97.7	4.68	1.92	3.14	0.97	4.33	70.2	4.79	284.33	2.25	1.68	84.02	4.06	0.781324	11.6	#NULL!	11.06	20.86	0.41	69.18	28.38	有	1	1	2	1	0.795	83.69	2.26	53	55	41.5	56.35
2	张殿宝	1	69	17.4	10.1	有	20	163	68	25.59	107	55	40.4	13.1	12.1	10.3	99.6	4.5	0.93	0.9	3.33	17.4	68.1	6.8	173.4	1.28	0.84	92.58	#NULL!	#NULL!	10.1	#NULL!	14.72	12.36	0.43	28.66	25.95	有	2	1	2	0	1.57	100.7	1.48	53.5	47.5	36.5	54.35
2	成保银	1	54	7	10	有	20	172	78	23.37	116	65	31.4	17.2	16.8	22.2	60	3.82	0.71	2.69	0.84	7	89	4.2	166	2.14	1.18	84.25	4.11	1.27867	10	#NULL!	16.64	7.41	0.19	27.4	12.31	有	2	1	2	0	1.39	99.63	1	53.5	55.5	35.5	50
2	孙素果	2	63	2.93	9.6	有	20	155	0	#NULL!	178	85	37.8	9.1	13.9	11.8	95.2	6.33	0.9	3.98	1.24	2.93	81.5	6	238.9	2.28	1.22	66.32	#NULL!	#NULL!	9.6	#NULL!	9.01	27.25	0.78	75.27	58.93	无	2	1	2	0	1.18	64.39	1.03	48.45	52.7	33.05	#NULL!
2	赵世亮	1	46	18.96	11.4	有	20	175	80	26.12	121	71	44.2	10.1	11.5	13.5	112.1	4.8	2.96	3.05	0.88	18.96	89.5	8.4	409.1	2.33	0.95	88.54	12.07	10.171	11.4	#NULL!	17.99	17.39	0.27	32.63	30.5	非增值期	1	1	2	0	1.32	106.3	1.15	46.5	48.5	42	53
2	盖冰卡	1	62	17.59	10.8	有	20	170	75	25.95	118	78	48.9	20.8	18	31.6	92.1	6.65	2.12	4.89	0.96	17.59	79.3	7.2	324.2	2.49	1.36	91.32	#NULL!	#NULL!	10.8	#NULL!	15.86	7.49	0.27	24.81	43.13	有	1	1	2	1	1.42	116.3	1.12	45.7	43.4	38.2	41
2	刘圣分	2	78	15.01	11.2	有	21	163	63	23.71	119	68	38.8	8	11.8	11.8	51.6	3.93	0.92	2.64	0.89	15.01	74.5	6.1	179.6	2.15	1.09	66.57	3.64	2.42828	11.2	40.17	13.72	6.67	0.24	24.45	47.7	有	2	1	2	0	0.964	92.16	0.936	52	54.5	40.25	49.25
2	陈振清	1	52	13.63	8.5	有	22	165	80	29.38	177	99	46.78	11.3	21	183.1	56.9	4.02	1.52	2.46	1.25	13.63	68	5.4	298.2	2.43	0.82	104.38	17.71	10.7283	8.5	24.92	28.06	6.38	0.07	17.66	19.92	无	1	1	1	1	1.57	109.2	1.37	49.4	49.1	36.7	52.15
2	李建蓬	1	49	12.26	9.3	有	22	172	95	32.11	150	83	42	8.7	21.5	32.2	85.4	4.81	1.36	0.98	3.4	12.26	82.2	8.1	318.7	2.28	0.93	96.08	5.59	3.04593	9.3	5.67	23.46	8.96	0.27	25.44	52.07	非增殖期	1	1	2	0	1.85	93.57	3.56	46.5	46.1	38.9	#NULL!
2	张兰芝	2	65	10.93	8.3	有	23	160	70	27.34	155	74	37.3	37.9	33.2	112.4	195.2	3.39	1.58	1.99	0.99	10.93	71.5	6.17	309.99	2.17	1.06	76.6	#NULL!	#NULL!	8.3	#NULL!	12.28	13.18	0.35	0.35	40	有	2	1	2	0	2.5	158.3	2.63	55.7	54.45	43.5	51.85
2	陆群山	1	75	10.09	8.6	有	23	#NULL!	80	25.25	166	86	40.1	14.8	13	52.1	53.4	2.37	1.26	1.43	0.65	10.09	82.8	4.5	357.5	2.21	1.29	79.34	60.77	#NULL!	8.6	21.56	33.41	13.71	#NULL!	#NULL!	36.34	无	2	1	2	1	1.36	75.96	1.77	53.45	52.3	36.1	51.55
2	杨志广	1	56	11.36	8.4	有	23	178	80	25.25	143	77	38.6	14.8	16.3	16.3	79.8	3.62	1.06	2.34	0.87	11.36	87.3	6.4	393.2	2.16	0.78	85.04	3.61	1.82265	8.4	#NULL!	15.36	10.99	0.18	37.34	24.74	非增值期	1	2	2	0	1.45	87.75	2.83	45.5	47.75	34.65	53.4
2	刘聚海	1	68	12.66	8.2	有	24	170	95	32.87	189	90	41.3	14.2	19.1	15.4	75.6	6.15	5.72	3.64	0.97	12.66	99.3	6.5	339.9	2.33	0.88	66.9	30.06	16.9138	8.2	#NULL!	22.24	8.73	0.11	20.21	37.1	无	1	1	1	1	1.44	94.38	1.48	52.8	53.2	44.15	49.8
2	孟献文	1	64	5.9	6.7	有	25	170	60	27.68	144	79	42.2	18.9	24.8	14.8	68.6	5.76	1.58	3.76	1.19	5.9	92.7	4.8	365.5	2.41	1.07	74.76	5.49	1.4396	6.7	#NULL!	13.85	15.48	0.42	40.75	57.07	无	1	1	2	0	1.7	84.86	2.53	53.25	58.9	48.4	54.8
2	张连海	1	54	10.41	7.6	有	25	176	80	25.83	121	70	41.43	26.7	22.1	32.3	82.8	4.11	1.69	2.79	0.74	10.41	73.1	6.57	369.26	2.27	1.13	99.91	#NULL!	#NULL!	7.6	#NULL!	16.39	18.68	0.36	44.69	40.79	无	1	1	2	0	1.34	74.72	1.84	44.5	51	38.5	#NULL!
2	袁占强	1	60	13.08	12.2	有	27	172	87	29.41	135	74	#NULL!	0	#NULL!		#NULL!	6.6	2.08	#NULL!	#NULL!	13.08	#NULL!	0	#NULL!	#NULL!	#NULL!	#NULL!	#NULL!	#NULL!	12.2	#NULL!	13.91	5.19	0.21	12.84	38.59	无	1	1	2	0	1.05	0	#NULL!	43.4	49.15	39.95	47.2
2	魏建华	1	65	9.92	11	有	0.6	170	70	24.22	111	87	36.9	17.5	18.4	21	86.9	4.95	1.7	0.83	3.68	9.92	86.5	8.8	417.7	2.21	1	80.7	2.34	1.03168	11	41.68	13.77	5.27	0.4	19.96	32.06	无	1	1	2	0	0.85	87.06	0.335	54.6	55.05	43.9	61.8
2	李春英	2	66	12.01	11.9	有	0.6	150	74	32.89	139	111	30.06	8.7	11.3	17.2	109.7	7.03	1.33	4.21	1.7	12.01	49	4.05	208.9	2.34	1.21	97.81	4.97	2.65288	11.9	29.08	11.9	14.72	0.36	42.11	64.51	无	2	1	2	0	1.29	96.66	2.75	53.6	55.1	43.5	58.3
2	杜永春	1	73	7.17	6.7	有	0.9	175	66	21.55	121	71	35.6	17.3	17.7	47.2	89.6	3.62	0.82	2.56	0.74	7.17	89	6.7	308.1	2.16	1.16	73.73	4.55	1.44993	6.7	#NULL!	18.85	13.74	0.42	38.76	29.23	有	2	2	2	0	1.31	90.36	2.56	52.95	51.95	43.6	47.4
2	郝建民	1	62	10.76	11.4	有	1	173	82	27.4	151	78	38.9	17	20.9	11.6	96.9	3.67	0.5	2.16	1.13	10.76	70.2	6.5	275.9	2.24	1.04	96.04	#NULL!	#NULL!	11.4	#NULL!	#NULL!	#NULL!	#NULL!	#NULL!	#NULL!	无	1	1	2	0	1.44	78.82	1.11	52.85	52.4	43.5	52.6
2	张普	1	48	9.88	8.3	有	1	178	80	25.25	175	101	40	274.6	146.3	242.7	176.2	4.88	0.88	3	1.32	9.88	55.8	4.5	207.4	2.29	0.96	116.45	7.96	3.49532	8.3	24.46	15.83	15.25	0.69	84.81	42.59	无	2	2	2	0	1.95	76.58	2.07	53.9	53.8	44.1	54.5
2	王玉琨	1	50	12.36	13.2	有	1	174	85	28.08	113	82	42.1	57.8	42.3	39.1	86.8	5.65	2.97	3.9	0.99	12.36	108.4	8.5	373.5	2.3	1.38	68.29	#NULL!	#NULL!	13.2	#NULL!	21.7	12.05	0.47	55.59	33.55	无	2	1	1	0	0.757	47.83	7.44	54.65	51.95	43.15	55.6
2	白振宇	1	38	13.37	10	有	1	180	92	28.4	130	95	37.1	32.4	13.5	89.4	78.6	4.55	5.72	2.97	0.75	13.37	88.8	6	580.4	1.94	0.84	94.55	5.8	3.44649	10	#NULL!	6.41	5.28	0.6	25.62	31.45	有	1	1	2	0	0.57	66.62	1.41	53.35	53.5	43.75	48.6
2	朱国华	1	45	6.75	7	有	2	182	95	28.68	136	94	42.84	68.6	28.5	90.8	74.8	3.12	0.95	1.88	0.88	6.75	62.4	6.3	189.4	2.24	1.46	113.58	6.81	2.043	7	18.4	16.91	14.29	0.13	42.28	29.36	有 非增殖期	2	2	1	0	1.97	62.36	2.73	57.75	58.75	48.9	57.6
2	张彦敏	1	60	10.85	8.2	有	3	172	82	27.72	157	108	44.8	14.7	17.4	42	97.6	4.97	1.89	3.2	1.13	10.85	84.5	5.83	270.9	2.45	1.11	86.06	7.46	3.59738	8.2	#NULL!	18.08	13.7	0.48	47.78	28.53	无	1	2	2	1	1.34	84.32	1.4	53.45	57.9	43.9	49.5
2	周立淼	1	67	6.23	7.4	有	3	173	82.5	27.57	143	80	35.7	19.4	17	16.8	70.8	4.69	1.06	2.89	1.32	6.23	71.9	5.34	348.9	2.25	1.45	91.79	5.16	1.42875	7.4	#NULL!	12.25	12.13	0.1	43.46	26.12	无	1	2	2	冠心病 不稳定心绞痛	1.03	62.28	2.32	53.3	52.9	43.6	51.6
2	刘华芳	2	63	7.01	9	有	3	161	65	25.08	101	75	42.3	27	22	33.5	56.7	6.55	1.54	4.63	1.3	7.01	68.7	6.4	218.9	2.36	1.36	81.49	17.27	5.38056	9	30.36	19.68	13.85	0.25	32.45	35.57	无	1	2	2	0	1.41	84.29	10.06	57.6	56.3	43.55	57.15
2	谷小龙	1	32	8.5	9.4	有	4	183	95	28.37	138	85	43.8	306.2	142.8	132.4	80	5.63	3.3	3.85	0.97	8.5	75.3	4.5	347.1	2.28	1.63	115.17	#NULL!	#NULL!	9.4	#NULL!	#NULL!	#NULL!	#NULL!	#NULL!	#NULL!	无	2	1	2	0	1.71	98.13	2.03	58.5	58	43.5	53.5
2	李晓天	1	56	10.63	9.6	有	5	180	100	30.86	146	84	43.9	73.9	44.3	42.2	88.4	6.51	3.18	4.47	0.83	10.63	86.3	4.3	421.4	2.35	1.31	86.25	17.45	8.24416	9.6	#NULL!	10.56	11.16	0.29	40.86	38.99	无	1	2	1	0	1.81	98.56	2.05	53.55	53.1	43.65	56.05
2	薛祥武	1	73	6.15	8.2	有	7	172	73	24.68	141	67	39	17.3	19.9	19.3	86.7	5.04	1.62	1.03	3.24	6.15	74.1	7.7	284.6	2.2	1.2	86.94	#NULL!	#NULL!	8.2	#NULL!	33.08	8.36	0.11	21.81	30.8	无	1	2	2	2	1.51	96.29	2.09	52.35	51.8	44.5	56.15
2	张素芹	2	54	6.44	8.6	有	9	163	82	30.86	118	79	44.5	14.4	16.8	21	136.1	5.17	2.29	1.06	3.46	6.44	70.3	6.9	265.5	2.4	1.34	84.47	#NULL!	#NULL!	8.6	#NULL!	10.33	29.1	0.98	87.63	50.55	非增殖期	1	1	2	1	1.62	99.23	4.3	55.5	56.5	46	57.25
2	李然花	2	63	8.17	8.9	有	10	153	80	34.17	151	77	40.8	14.2	10.7	33.4	110.5	4.92	1.16	2.73	1.66	8.17	67	5.25	299.76	2.34	1.39	84.04	#NULL!	#NULL!	8.9	#NULL!	16.19	17.83	0.5	51.77	46.52	无	2	1	2	1	1.21	90.21	1.56	52.7	53	42.15	64.4
2	王增印	1	66	4.36	6.5	有	10	170	76	26.3	133	83	38.5	14.3	15.8	14.8	66.6	4.11	1.12	2.71	0.88	4.36	73.9	6.77	279.98	2.2	1.12	91.42	7.31	1.41652	6.5	#NULL!	30.5	8.98	0.18	27.88	32.56	无	2	2	1	0	1.68	89.48	1.4	52.5	55.55	46.2	52.5
2	孙伟信	1	43	14.71	10.8	有	10	160	60	35.94	120	82	44.8	10.7	13	20.9	97.8	5.76	1.22	3.72	1.3	14.71	72.9	5.4	209.7	2.34	1.02	108.06	2.99	1.9548	10.8	#NULL!	19.48	12.38	0.42	32.68	50.88	无	2	1	2	0	1.57	79.41	1.3	51.9	56.4	44.5	54.35
2	郭晖	1	47	8.83	9.5	有	10	170	91	31.49	122	81	40.48	14	11.3	28.5	70.6	5.83	2.06	3.97	0.92	8.83	69	5.9	307.4	2.32	1.35	107.47	6.67	2.6176	9.5	#NULL!	19.35	12.59	0.46	36.09	18.94	有 非增值性	2	1	2	0	1.64	91.7	0.505	58	58.35	44.2	57.45
2	于建合	1	56	4.96	8.9	有	10	176	74	23.89	114	73	37.6	15.4	16.7	16.8	100.7	6.01	0.87	3.89	1.65	4.96	63.8	4.8	311.3	2.18	0.85	104.18	0.549	0.121024	8.9	42.79	#NULL!	#NULL!	#NULL!	#NULL!	#NULL!	无	2	1	2	0	1.22	87.91	1.19	53	54.6	44.4	56.6
2	谢巧雪	2	67	4.82	7.1	无	11	160	85	33.2	174	105	37	13.9	23.8	19.5	93.5	5.03	1.19	3.02	1.32	4.82	113.8	9.1	330.2	2.32	1.37	43.08	16.99	3.63964	7.1	#NULL!	12.56	29.92	0.79	85.06	43.48	有	2	2	2	0	1.45	81	2.06	63.15	61.8	46.35	57.2
2	裴志栋	1	54	13.88	9.4	有	11	176	80	25.83	112	76	44.7	15	15.2	49	80.2	5.95	2.21	1.01	4.21	13.88	65.2	5	374.2	2.38	0.85	104.72	12.37	7.63092	9.4	#NULL!	19.2	13.89	0.51	44.61	50.62	无	1	1	2	0	1.83	108.1	2.44	53.6	55.85	48.7	55.15
2	易连祥	1	55	9.9	8.2	无	20	179	90	28.09	144	96	43.7	27.4	25.2	32.6	64.4	4.35	1.75	1.26	2.64	9.9	76.6	4.8	354.5	2.28	1.13	97.32	16.17	7.1148	8.2	18.56	16.29	12.56	0.27	31.99	37.08	无	1	1	1	1	1.36	73.67	1.27	54.2	52.65	44.15	58.75
2	许静庭	1	67	5.21	6.3	有	20	180	76	23.46	127	75	37.9	12.3	16	13	87.9	4.7	1.14	0.9	3.34	5.21	64	4.2	287.4	2.22	1.38	96.31	4.95	1.1462	6.3	#NULL!	27.43	22.14	0.8	72.23	34.37	无	2	2	2	0	1.52	67.38	1.62	57	54.5	43.5	54.55
2	董新平	1	61	11.1	8.3	有	20	173	84	28.07	143	81	44.5	18.2	18.2	18.5	137.3	4.7	1.41	2.97	1.06	11.1	69.4	3.74	278.5	2.29	0.89	97.17	#NULL!	#NULL!	8.3	26.36	15.78	12.25	0.14	38.45	32.84	无	2	1	2		1.47	65.19	1.34	53.4	53.3	43.4	63.35
2	宋建辉	2	55	4.6	7.9	有	20	160	72	28.12	142	65	39.91	16.3	28	46.1	135	3	2.24	1.79	0.78	4.6	248.7	15.31	261.8	2.23	1.52	18.21	#NULL!	#NULL!	7.9	#NULL!	#NULL!	#NULL!	#NULL!	#NULL!	#NULL!	未查	2	1	2	0	1.07	79.12	2.14	56.9	58.2	43.95	61.1
2	常敏	2	74	11.91	11.3	有	20	156	60	24.65	164	98	38.7	11.9	14.2	19.8	71.6	7.98	1.3	5.34	1.42	11.91	67.9	4.38	234.1	2.34	0.93	76.5	2.56	1.35509	11.3	33.81	14.9	14.48	0.17	37.15	64.59	无	2	1	2	0	1.56	119.4	1.04	58.55	55.8	42.95	58.95
2	王惠荣	2	65	3.92	8.5	有	27	164	70	26.03	127	71	39.2	17.4	23.7	11	81.5	4.84	0.84	2.96	1.05	3.92	60.2	7.1	233.7	2.18	1.25	92.05	#NULL!	#NULL!	8.5	#NULL!	21.19	13.17	0.45	48.18	53.71	有	2	1	2	1	1.41	110	3.29	59.6	52.55	45.25	51.45
2	郭惠英	2	73	5.88	8.2	有	27	157	57	23.12	176	91	39.5	10.3	13.6	13.8	79.2	5.1	1.07	3.26	1.06	5.88	63.4	3.7	277.9	2.21	1.23	83.68	108.6	28.3808	8.2	19.79	23.72	21.55	0.78	65.59	53.93	无	1	1	2	1	1.14	77.82	2.67	54.35	56	45.45	53.45
[truncated: 34 more columns]
